# Supplementary material for: Establishment and maintenance of motor neuron identity via temporal modularity in terminal selector function
Source: eLife. 2020 Oct 1;9:e59464. doi: 10.7554/eLife.59464 (PMC7529460; doi:10.7554/eLife.59464)
Supplement: Supplementary file 2. — In total, 1425 genes are classified into 25 protein classes. [file elife-59464-supp2.xlsx]

## Sheet: Transferase
CAEEL|WormBase=WBGene00003048|UniProtKB=Q9U9Y8	176808	Serine/threonine kinase NLK;lit-1;ortholog	MITOGEN-ACTIVATED PROTEIN KINASE (PTHR24055:SF196)	non-receptor serine/threonine protein kinase(PC00167)	Caenorhabditis elegans
CAEEL|WormBase=WBGene00013994|UniProtKB=G5EFV2	172500	Uncharacterized protein;CELE_ZK524.4;ortholog	SNF-RELATED SERINE/THREONINE-PROTEIN KINASE (PTHR24343:SF181)	non-receptor serine/threonine protein kinase(PC00167)	Caenorhabditis elegans
CAEEL|WormBase=WBGene00010427|UniProtKB=G5ED17	186807	Uncharacterized protein;hpo-11;ortholog	NUCLEAR RECEPTOR-BINDING PROTEIN HOMOLOG (PTHR13902:SF67)	non-receptor serine/threonine protein kinase(PC00167)	Caenorhabditis elegans
CAEEL|WormBase=WBGene00001994|UniProtKB=Q8MQ70	180695	Homeodomain-interacting protein kinase 1;hpk-1;ortholog	HOMEODOMAIN INTERACTING PROTEIN KINASE, ISOFORM A (PTHR24058:SF17)	non-receptor serine/threonine protein kinase(PC00167);non-receptor tyrosine protein kinase(PC00168)	Caenorhabditis elegans
CAEEL|WormBase=WBGene00007135|UniProtKB=P46551	175559	Cyclin-dependent kinase 12;cdk-12;ortholog	CYCLIN-DEPENDENT KINASE 13 (PTHR24056:SF233)	non-receptor serine/threonine protein kinase(PC00167);non-receptor tyrosine protein kinase(PC00168)	Caenorhabditis elegans
CAEEL|WormBase=WBGene00004259|UniProtKB=Q18990	174385	CAD protein;pyr-1;ortholog	CAD PROTEIN (PTHR11405:SF5)	cysteine protease(PC00081);ligase(PC00142);metalloprotease(PC00153);transferase(PC00220)	Caenorhabditis elegans
CAEEL|WormBase=WBGene00000466|UniProtKB=Q17607	172814	mRNA-capping enzyme;cel-1;ortholog	MRNA-CAPPING ENZYME (PTHR10367:SF0)	nucleotidyltransferase(PC00174);phosphatase(PC00181)	Caenorhabditis elegans
CAEEL|WormBase=WBGene00000406|UniProtKB=Q9XTR1	181472	Cyclin-dependent kinase 4 homolog;cdk-4;ortholog	CYCLIN-DEPENDENT KINASE 4, ISOFORM A (PTHR24056:SF422)	non-receptor serine/threonine protein kinase(PC00167);non-receptor tyrosine protein kinase(PC00168)	Caenorhabditis elegans
CAEEL|WormBase=WBGene00001043|UniProtKB=G5EDJ6	180356	Auxilin;dnj-25;ortholog	AUXILIN, ISOFORM A (PTHR23172:SF19)	chaperone(PC00072);non-receptor serine/threonine protein kinase(PC00167)	Caenorhabditis elegans
CAEEL|WormBase=WBGene00010991|UniProtKB=Q09595	187536	Putative serine/threonine-protein kinase R03D7.5;R03D7.5;ortholog	SERINE/THREONINE-PROTEIN KINASE R03D7.5-RELATED (PTHR24057:SF18)	non-receptor serine/threonine protein kinase(PC00167)	Caenorhabditis elegans
CAEEL|WormBase=WBGene00021534|UniProtKB=Q65XX9	175863	MeValonate Kinase;mvk-1;ortholog	MEVALONATE KINASE (PTHR43290:SF2)	carbohydrate kinase(PC00065)	Caenorhabditis elegans
CAEEL|WormBase=WBGene00011393|UniProtKB=B5BM47	180364	Uncharacterized protein;CELE_T03D8.6;ortholog	SUBFAMILY NOT NAMED (PTHR11686:SF17)	acyltransferase(PC00042);protease(PC00190)	Caenorhabditis elegans
CAEEL|WormBase=WBGene00020324|UniProtKB=Q22324	180763	Uncharacterized protein;CELE_T07F12.4;ortholog	SUBFAMILY NOT NAMED (PTHR24348:SF45)	non-receptor serine/threonine protein kinase(PC00167)	Caenorhabditis elegans
CAEEL|WormBase=WBGene00021474|UniProtKB=Q6AW06	171797	Histone-lysine N-methyltransferase, H3 lysine-79 specific;dot-1.1;ortholog	HISTONE-LYSINE N-METHYLTRANSFERASE, H3 LYSINE-79 SPECIFIC (PTHR21451:SF0)	methyltransferase(PC00155)	Caenorhabditis elegans
CAEEL|WormBase=WBGene00016957|UniProtKB=Q95QQ4	177576	5-Aminoimidazole-4-carboxamide ribonucleotide formylTransferase/IMP Cyclohydrolase homolog;atic-1;ortholog	BIFUNCTIONAL PURINE BIOSYNTHESIS PROTEIN PURH (PTHR11692:SF0)	hydrolase(PC00121);methyltransferase(PC00155)	Caenorhabditis elegans
CAEEL|WormBase=WBGene00020696|UniProtKB=Q9N5U1	178777	Alpha-1,4 glucan phosphorylase;pygl-1;ortholog	GLYCOGEN PHOSPHORYLASE, MUSCLE FORM (PTHR11468:SF13)	phosphorylase(PC00187)	Caenorhabditis elegans
CAEEL|WormBase=WBGene00000410|UniProtKB=Q9TVL3	173023	Probable cyclin-dependent kinase 9;cdk-9;ortholog	CYCLIN-DEPENDENT KINASE 9 (PTHR24056:SF414)	non-receptor serine/threonine protein kinase(PC00167);non-receptor tyrosine protein kinase(PC00168)	Caenorhabditis elegans
CAEEL|WormBase=WBGene00000959|UniProtKB=H2KYI9	180720	Diacylglycerol kinase;dgk-2;ortholog	DIACYLGLYCEROL KINASE EPSILON (PTHR11255:SF45)	kinase(PC00137)	Caenorhabditis elegans
CAEEL|WormBase=WBGene00020068|UniProtKB=Q21986	175956	N-terminal acetyltransferase B complex subunit NAA25 homolog;cra-1;ortholog	N-ALPHA-ACETYLTRANSFERASE 25, NATB AUXILIARY SUBUNIT (PTHR22767:SF3)	acetyltransferase(PC00038)	Caenorhabditis elegans
CAEEL|WormBase=WBGene00011122|UniProtKB=G5ECS9	178025	Carnitine Palmitoyl Transferase;cpt-2;ortholog	CARNITINE O-PALMITOYLTRANSFERASE 2, MITOCHONDRIAL (PTHR22589:SF16)	acetyltransferase(PC00038);acyltransferase(PC00042)	Caenorhabditis elegans
CAEEL|WormBase=WBGene00019087|UniProtKB=Q21025	173864	Uncharacterized protein;CELE_F59A6.5;ortholog	SUBFAMILY NOT NAMED (PTHR22988:SF39)	non-receptor serine/threonine protein kinase(PC00167)	Caenorhabditis elegans
CAEEL|WormBase=WBGene00016841|UniProtKB=P91182	183676	MAGUK family;magu-3;ortholog	FI17352P1 (PTHR23122:SF69)	cell junction protein(PC00070);nucleotide kinase(PC00172)	Caenorhabditis elegans
CAEEL|WormBase=WBGene00016978|UniProtKB=Q09287	183866	Uncharacterized protein C56G2.3;C56G2.3;ortholog	SUBFAMILY NOT NAMED (PTHR13563:SF12)	DNA methyltransferase(PC00013)	Caenorhabditis elegans
CAEEL|WormBase=WBGene00004182|UniProtKB=K8ESD7	175980	Pim (Mammalian oncogene) Related Kinase;prk-1;ortholog	PIM (MAMMALIAN ONCOGENE) RELATED KINASE (PTHR22984:SF27)	serine/threonine protein kinase receptor(PC00205)	Caenorhabditis elegans
CAEEL|WormBase=WBGene00007175|UniProtKB=Q17499	181682	Uncharacterized protein;B0395.3;ortholog	CARNITINE O-ACETYL-TRANSFERASE, ISOFORM A (PTHR22589:SF103)	acetyltransferase(PC00038);acyltransferase(PC00042)	Caenorhabditis elegans
CAEEL|WormBase=WBGene00009078|UniProtKB=Q9U3I0	184886	RNA Polymerase II (B) subunit;rpb-12;ortholog	DNA-DIRECTED RNA POLYMERASES I, II, AND III SUBUNIT RPABC4 (PTHR12056:SF2)	DNA-directed RNA polymerase(PC00019);nucleotidyltransferase(PC00174)	Caenorhabditis elegans
CAEEL|WormBase=WBGene00021112|UniProtKB=P91529	172081	Probable DNA-directed RNA polymerase III subunit RPC6;W09C3.4;ortholog	DNA-DIRECTED RNA POLYMERASE III SUBUNIT RPC6 (PTHR12780:SF1)	DNA-directed RNA polymerase(PC00019);nucleotidyltransferase(PC00174)	Caenorhabditis elegans
CAEEL|WormBase=WBGene00020090|UniProtKB=O61706	171631	Uncharacterized protein;CELE_R119.5;ortholog	SUBFAMILY NOT NAMED (PTHR11579:SF9)	methyltransferase(PC00155)	Caenorhabditis elegans
CAEEL|WormBase=WBGene00018657|UniProtKB=Q9N5S8	180519	ACyLtransferase-like;acl-4;ortholog	ACYLTRANSFERASE-LIKE (PTHR23063:SF8)	acyltransferase(PC00042);annexin(PC00050);calmodulin(PC00061)	Caenorhabditis elegans
CAEEL|WormBase=WBGene00001794|UniProtKB=Q21217	177897	Probable 4-aminobutyrate aminotransferase, mitochondrial;gta-1;ortholog	4-AMINOBUTYRATE AMINOTRANSFERASE, MITOCHONDRIAL (PTHR43206:SF1)	transaminase(PC00216)	Caenorhabditis elegans
CAEEL|WormBase=WBGene00003150|UniProtKB=Q9XTF3	178250	Dual specificity tyrosine-phosphorylation-regulated kinase mbk-2;mbk-2;ortholog	DUAL SPECIFICITY TYROSINE-PHOSPHORYLATION-REGULATED KINASE 3 HOMOLOG-RELATED (PTHR24058:SF112)	non-receptor serine/threonine protein kinase(PC00167);non-receptor tyrosine protein kinase(PC00168)	Caenorhabditis elegans
CAEEL|WormBase=WBGene00006579|UniProtKB=P34314	176369	Serine/threonine-protein kinase tousled-like 1;tlk-1;ortholog	TOUSLED-LIKE KINASE, ISOFORM G (PTHR22974:SF23)	non-receptor serine/threonine protein kinase(PC00167)	Caenorhabditis elegans
CAEEL|WormBase=WBGene00018238|UniProtKB=Q20220	180614	Uncharacterized protein;CELE_F40F4.7;ortholog	N-ALPHA-ACETYLTRANSFERASE 50 (PTHR42919:SF8)	acetyltransferase(PC00038)	Caenorhabditis elegans
CAEEL|WormBase=WBGene00015326|UniProtKB=G5EEH6	177281	Isovaleryl-CoA dehydrogenase;ivd-1;ortholog	ISOVALERYL-COA DEHYDROGENASE, MITOCHONDRIAL (PTHR43884:SF10)	dehydrogenase(PC00092);oxidase(PC00175);transferase(PC00220)	Caenorhabditis elegans
CAEEL|WormBase=WBGene00000897|UniProtKB=P20792	176829	Cell surface receptor daf-1;daf-1;ortholog	CELL SURFACE RECEPTOR DAF-1 (PTHR23255:SF95)	TGF-beta receptor(PC00035);serine/threonine protein kinase receptor(PC00205)	Caenorhabditis elegans
CAEEL|WormBase=WBGene00010418|UniProtKB=G5EBT9	179482	Uncharacterized protein;CELE_H27A22.1;ortholog	GH11174P (PTHR12283:SF6)	metalloprotease(PC00153);transferase(PC00220)	Caenorhabditis elegans
CAEEL|WormBase=WBGene00002192|UniProtKB=H9G328	178068	Protein KINase;kin-4;ortholog	DROP OUT, ISOFORM A (PTHR24356:SF356)	annexin(PC00050);calmodulin(PC00061);non-receptor serine/threonine protein kinase(PC00167);transfer/carrier protein(PC00219)	Caenorhabditis elegans
CAEEL|WormBase=WBGene00002202|UniProtKB=P42168	175524	Casein kinase I isoform alpha;kin-19;ortholog	CASEIN KINASE I ISOFORM ALPHA (PTHR11909:SF20)	non-receptor serine/threonine protein kinase(PC00167)	Caenorhabditis elegans
CAEEL|WormBase=WBGene00008167|UniProtKB=P34355	176353	Probable peroxisomal acyl-coenzyme A oxidase 1.5;acox-1.5;ortholog	PEROXISOMAL ACYL-COENZYME A OXIDASE 1.5-RELATED (PTHR10909:SF304)	dehydrogenase(PC00092);oxidase(PC00175);transferase(PC00220)	Caenorhabditis elegans
CAEEL|WormBase=WBGene00012017|UniProtKB=O45814	188886	Uncharacterized protein;CELE_T25C8.1;ortholog	SEDOHEPTULOKINASE (PTHR10196:SF67)	carbohydrate kinase(PC00065)	Caenorhabditis elegans
CAEEL|WormBase=WBGene00021882|UniProtKB=Q95XX1	177070	Nicotinate phosphoribosyltransferase;nprt-1;ortholog	NICOTINATE PHOSPHORIBOSYLTRANSFERASE (PTHR11098:SF1)	glycosyltransferase(PC00111)	Caenorhabditis elegans
CAEEL|WormBase=WBGene00009483|UniProtKB=Q09318	181192	Uncharacterized protein F36G3.2;F36G3.2;ortholog	SUBFAMILY NOT NAMED (PTHR47237:SF1)	acetyltransferase(PC00038)	Caenorhabditis elegans
CAEEL|WormBase=WBGene00010681|UniProtKB=Q21360	174398	MAP kinase-activated protein kinase mak-1;mak-1;ortholog	MAP KINASE-ACTIVATED PROTEIN KINASE MAK-1 (PTHR24349:SF109)	non-motor microtubule binding protein(PC00166);non-receptor serine/threonine protein kinase(PC00167)	Caenorhabditis elegans
CAEEL|WormBase=WBGene00000481|UniProtKB=P32756	24105307	Choline O-acetyltransferase;cha-1;ortholog	CHOLINE O-ACETYLTRANSFERASE (PTHR22589:SF14)	acetyltransferase(PC00038);acyltransferase(PC00042)	Caenorhabditis elegans
CAEEL|WormBase=WBGene00004727|UniProtKB=Q2L6W9	180655	Serine/threonine-protein kinase sax-1;sax-1;ortholog	SERINE/THREONINE-PROTEIN KINASE TRICORNER (PTHR24356:SF184)	annexin(PC00050);calmodulin(PC00061);non-receptor serine/threonine protein kinase(PC00167);transfer/carrier protein(PC00219)	Caenorhabditis elegans
CAEEL|WormBase=WBGene00013920|UniProtKB=Q09643	181211	PhosphatidylSerine SYnthase;pssy-1;ortholog	PHOSPHATIDYLSERINE SYNTHASE 1 (PTHR15362:SF15)	transferase(PC00220)	Caenorhabditis elegans
CAEEL|WormBase=WBGene00000514|UniProtKB=Q9GZF3	184864	Choline Kinase B;ckb-4;ortholog	CHOLINE KINASE B (PTHR22603:SF30)	kinase(PC00137)	Caenorhabditis elegans
CAEEL|WormBase=WBGene00004762|UniProtKB=G5ECQ3	175599	Serine/threonine-protein kinase sel-5;sel-5;ortholog	NUMB-ASSOCIATED KINASE, ISOFORM A (PTHR22967:SF57)	non-receptor serine/threonine protein kinase(PC00167)	Caenorhabditis elegans
CAEEL|WormBase=WBGene00021686|UniProtKB=Q9BL15	171697	Uncharacterized protein;CELE_Y48G8AL.5;ortholog	TRNA (CYTOSINE(34)-C(5))-METHYLTRANSFERASE (PTHR22808:SF1)	methyltransferase(PC00155);nucleic acid binding(PC00171)	Caenorhabditis elegans
CAEEL|WormBase=WBGene00014054|UniProtKB=Q23571	174279	Lipoamide acyltransferase component of branched-chain alpha-keto acid dehydrogenase complex, mitochondrial;dbt-1;ortholog	LIPOAMIDE ACYLTRANSFERASE COMPONENT OF BRANCHED-CHAIN ALPHA-KETO ACID DEHYDROGENASE COMPLEX, MITOCHONDRIAL (PTHR43178:SF5)	acetyltransferase(PC00038);acyltransferase(PC00042)	Caenorhabditis elegans
CAEEL|WormBase=WBGene00022719|UniProtKB=Q02332	176226	Probable [pyruvate dehydrogenase (acetyl-transferring)] kinase, mitochondrial;pdhk-2;ortholog	[PYRUVATE DEHYDROGENASE (ACETYL-TRANSFERRING)] KINASE, MITOCHONDRIAL (PTHR11947:SF3)	protein kinase(PC00193)	Caenorhabditis elegans
CAEEL|WormBase=WBGene00000103|UniProtKB=Q9XTG7	181524	Serine/threonine-protein kinase akt-2;akt-2;ortholog	RAC SERINE/THREONINE-PROTEIN KINASE (PTHR24356:SF333)	annexin(PC00050);calmodulin(PC00061);non-receptor serine/threonine protein kinase(PC00167);transfer/carrier protein(PC00219)	Caenorhabditis elegans
CAEEL|WormBase=WBGene00021002|UniProtKB=O16992	178543	Uncharacterized protein;CELE_W03F9.4;ortholog	SUBFAMILY NOT NAMED (PTHR22589:SF104)	acetyltransferase(PC00038);acyltransferase(PC00042)	Caenorhabditis elegans
CAEEL|WormBase=WBGene00012198|UniProtKB=Q9XVH4	175043	Uncharacterized protein;CELE_W02B8.2;ortholog	SUBFAMILY NOT NAMED (PTHR22988:SF39)	non-receptor serine/threonine protein kinase(PC00167)	Caenorhabditis elegans
CAEEL|WormBase=WBGene00020719|UniProtKB=O17003	179228	N-alpha-AcetylTransferase C complex subunit;natc-1;ortholog	N-ALPHA-ACETYLTRANSFERASE 35, NATC AUXILIARY SUBUNIT (PTHR21373:SF0)	acetyltransferase(PC00038)	Caenorhabditis elegans
CAEEL|WormBase=WBGene00000958|UniProtKB=Q17860	180452	Diacylglycerol kinase;dgk-1;ortholog	DIACYLGLYCEROL KINASE THETA (PTHR11255:SF34)	kinase(PC00137)	Caenorhabditis elegans
CAEEL|WormBase=WBGene00012187|UniProtKB=Q9XVH6	175056	Probable DNA-directed RNA polymerase II subunit RPB11;rpb-11;ortholog	DNA-DIRECTED RNA POLYMERASE II SUBUNIT RPB11 (PTHR13946:SF16)	DNA-directed RNA polymerase(PC00019);nucleotidyltransferase(PC00174)	Caenorhabditis elegans
CAEEL|WormBase=WBGene00009793|UniProtKB=G5EGE3	181244	Protein Kinase N (PKN) homolog;pkn-1;ortholog	SERINE/THREONINE-PROTEIN KINASE N (PTHR24356:SF210)	annexin(PC00050);calmodulin(PC00061);non-receptor serine/threonine protein kinase(PC00167);transfer/carrier protein(PC00219)	Caenorhabditis elegans
CAEEL|WormBase=WBGene00004088|UniProtKB=Q9BL73	175344	PIP Kinase;ppk-2;ortholog	PHOSPHATIDYLINOSITOL 5-PHOSPHATE 4-KINASE, ISOFORM A (PTHR23086:SF8)	kinase(PC00137)	Caenorhabditis elegans
CAEEL|WormBase=WBGene00017830|UniProtKB=Q19826	175660	Probable DNA-directed RNA polymerases I, II, and III subunit RPABC3;rpb-8;ortholog	DNA-DIRECTED RNA POLYMERASES I, II, AND III SUBUNIT RPABC3 (PTHR10917:SF0)	DNA-directed RNA polymerase(PC00019);nucleotidyltransferase(PC00174)	Caenorhabditis elegans
CAEEL|WormBase=WBGene00016236|UniProtKB=Q18313	183036	C.Elegans Chromodomain protein;cec-9;ortholog	AUTOPHAGY-RELATED 1, ISOFORM B (PTHR24348:SF22)	non-receptor serine/threonine protein kinase(PC00167)	Caenorhabditis elegans
CAEEL|WormBase=WBGene00017714|UniProtKB=Q19742	184850	Uncharacterized protein;CELE_F22F1.2;ortholog	SUBFAMILY NOT NAMED (PTHR11909:SF118)	non-receptor serine/threonine protein kinase(PC00167)	Caenorhabditis elegans
CAEEL|WormBase=WBGene00021845|UniProtKB=Q9N3C9	171877	RNA Polymerase II (B) subunit;rpb-7;ortholog	DNA-DIRECTED RNA POLYMERASE II SUBUNIT RPB7 (PTHR12709:SF4)	DNA-directed RNA polymerase(PC00019);nucleotidyltransferase(PC00174);transcription factor(PC00218)	Caenorhabditis elegans
CAEEL|WormBase=WBGene00007194|UniProtKB=Q17514	174737	Diphthine synthase;B0491.7;ortholog	DIPHTHINE METHYL ESTER SYNTHASE (PTHR10882:SF0)	methyltransferase(PC00155)	Caenorhabditis elegans
CAEEL|WormBase=WBGene00003149|UniProtKB=Q8WQL7	181578	Dual specificity tyrosine-phosphorylation-regulated kinase mbk-1;mbk-1;ortholog	DUAL SPECIFICITY TYROSINE-PHOSPHORYLATION-REGULATED KINASE 1B (PTHR24058:SF12)	non-receptor serine/threonine protein kinase(PC00167);non-receptor tyrosine protein kinase(PC00168)	Caenorhabditis elegans
CAEEL|WormBase=WBGene00015484|UniProtKB=Q11186	175910	Patanin-like phospholipase domain-containing protein;atgl-1;ortholog	BRUMMER, ISOFORM B-RELATED (PTHR12406:SF41)	acyltransferase(PC00042);phospholipase(PC00186)	Caenorhabditis elegans
CAEEL|WormBase=WBGene00004360|UniProtKB=O01704	178080	Exostosin-1 homolog;rib-1;ortholog	EXOSTOSIN-1 (PTHR11062:SF129)	glycosyltransferase(PC00111)	Caenorhabditis elegans
CAEEL|WormBase=WBGene00002991|UniProtKB=P54936	181400	Protein lin-2;lin-2;ortholog	PERIPHERAL PLASMA MEMBRANE PROTEIN CASK (PTHR23122:SF7)	cell junction protein(PC00070);nucleotide kinase(PC00172);protein kinase(PC00193)	Caenorhabditis elegans
CAEEL|WormBase=WBGene00008806|UniProtKB=Q19468	181252	Lysophospholipid acyltransferase 7;mboa-7;ortholog	LYSOPHOSPHOLIPID ACYLTRANSFERASE 7 (PTHR13906:SF16)	acetyltransferase(PC00038)	Caenorhabditis elegans
CAEEL|WormBase=WBGene00001240|UniProtKB=Q9XVQ9	178532	Elongation of very long chain fatty acids protein;elo-2;ortholog	ELONGATION OF VERY LONG CHAIN FATTY ACIDS PROTEIN (PTHR11157:SF30)	acyltransferase(PC00042)	Caenorhabditis elegans
CAEEL|WormBase=WBGene00011147|UniProtKB=P30646	187700	Uncharacterized sugar kinase R08D7.7;R08D7.7;ortholog	XYLULOSE KINASE (PTHR10196:SF57)	carbohydrate kinase(PC00065)	Caenorhabditis elegans
CAEEL|WormBase=WBGene00007007|UniProtKB=Q965G5	176914	MAP kinase-activated protein kinase mak-2;mak-2;ortholog	MAP KINASE-ACTIVATED PROTEIN KINASE 2 (PTHR24349:SF273)	non-motor microtubule binding protein(PC00166);non-receptor serine/threonine protein kinase(PC00167)	Caenorhabditis elegans
CAEEL|WormBase=WBGene00022501|UniProtKB=Q23083	180770	Uncharacterized protein;CELE_ZC8.6;ortholog	LD24833P (PTHR12865:SF1)	kinase(PC00137)	Caenorhabditis elegans
CAEEL|WormBase=WBGene00012205|UniProtKB=Q23126	174753	tRNA (guanine-N(7)-)-methyltransferase;W02B12.10;ortholog	TRNA (GUANINE-N(7)-)-METHYLTRANSFERASE (PTHR23417:SF16)	methyltransferase(PC00155)	Caenorhabditis elegans
CAEEL|WormBase=WBGene00001154|UniProtKB=O45106	176908	Enoyl-CoA Hydratase;ech-5;ortholog	FI23914P1 (PTHR11941:SF105)	acetyltransferase(PC00038);acyltransferase(PC00042);dehydrogenase(PC00092);epimerase/racemase(PC00096);hydratase(PC00120);ligase(PC00142)	Caenorhabditis elegans
CAEEL|WormBase=WBGene00019246|UniProtKB=Q9N5K2	172412	DNA-directed RNA polymerases I, II, and III subunit RPABC1;rpb-5;ortholog	DNA-DIRECTED RNA POLYMERASES I, II, AND III SUBUNIT RPABC1 (PTHR10535:SF0)	DNA-directed RNA polymerase(PC00019);nucleotidyltransferase(PC00174)	Caenorhabditis elegans
CAEEL|WormBase=WBGene00018519|UniProtKB=Q10454	180986	Probable arginine kinase F46H5.3;F46H5.3;ortholog	ARGININE KINASE F46H5.3-RELATED (PTHR11547:SF37)	amino acid kinase(PC00045)	Caenorhabditis elegans
CAEEL|WormBase=WBGene00000409|UniProtKB=P90866	172677	Cyclin-dependent kinase 8;cdk-8;ortholog	CYCLIN-DEPENDENT KINASE 8 (PTHR24056:SF92)	non-receptor serine/threonine protein kinase(PC00167);non-receptor tyrosine protein kinase(PC00168)	Caenorhabditis elegans
CAEEL|WormBase=WBGene00018076|UniProtKB=Q20077	180443	PhosphoInositide Four Kinase (PI-4 Kinase);pifk-1;ortholog	PHOSPHATIDYLINOSITOL 4-KINASE BETA (PTHR10048:SF22)	kinase(PC00137)	Caenorhabditis elegans
CAEEL|WormBase=WBGene00007330|UniProtKB=Q09450	174548	Probable succinyl-CoA:3-ketoacid coenzyme A transferase, mitochondrial;C05C10.3;ortholog	SUCCINYL-COA:3-KETOACID-COENZYME A TRANSFERASE (PTHR13707:SF23)	transferase(PC00220)	Caenorhabditis elegans
CAEEL|WormBase=WBGene00017818|UniProtKB=O61968	184972	Gluconokinase;CELE_F26D11.1;ortholog	GLUCONOKINASE-RELATED (PTHR43442:SF3)	transferase(PC00220)	Caenorhabditis elegans
CAEEL|WormBase=WBGene00015064|UniProtKB=Q09438	174252	S-methyl-5'-thioadenosine phosphorylase;B0228.7;ortholog	S-METHYL-5'-THIOADENOSINE PHOSPHORYLASE (PTHR42679:SF2)	phosphorylase(PC00187)	Caenorhabditis elegans
CAEEL|WormBase=WBGene00006599|UniProtKB=P34722	176825	Protein kinase C-like 1;tpa-1;ortholog	PROTEIN KINASE C DELTA TYPE HOMOLOG-RELATED (PTHR24356:SF347)	annexin(PC00050);calmodulin(PC00061);non-receptor serine/threonine protein kinase(PC00167);transfer/carrier protein(PC00219)	Caenorhabditis elegans
CAEEL|WormBase=WBGene00007029|UniProtKB=Q9TYU5	179096	Histone acetyltransferase Tip60 homolog;mys-1;ortholog	HISTONE ACETYLTRANSFERASE KAT5 (PTHR10615:SF161)	acetyltransferase(PC00038);chromatin/chromatin-binding protein(PC00077);zinc finger transcription factor(PC00244)	Caenorhabditis elegans
CAEEL|WormBase=WBGene00000900|UniProtKB=P50488	175781	Cell surface receptor daf-4;daf-4;ortholog	SERINE/THREONINE-PROTEIN KINASE RECEPTOR (PTHR23255:SF98)	TGF-beta receptor(PC00035);serine/threonine protein kinase receptor(PC00205)	Caenorhabditis elegans
CAEEL|WormBase=WBGene00022519|UniProtKB=H2L0S7	171672	Uncharacterized protein;CELE_ZC123.4;ortholog	ECDYSONE-INDUCED PROTEIN 63E, ISOFORM N (PTHR24056:SF189)	non-receptor serine/threonine protein kinase(PC00167);non-receptor tyrosine protein kinase(PC00168)	Caenorhabditis elegans
CAEEL|WormBase=WBGene00000408|UniProtKB=G5EFV5	171784	Cyclin-dependent kinase 7;cdk-7;ortholog	CYCLIN-DEPENDENT KINASE 7 (PTHR24056:SF0)	non-receptor serine/threonine protein kinase(PC00167);non-receptor tyrosine protein kinase(PC00168)	Caenorhabditis elegans
CAEEL|WormBase=WBGene00004032|UniProtKB=P34885	179649	Protein kinase C-like 1B;pkc-1;ortholog	PROTEIN KINASE C (PTHR24356:SF240)	annexin(PC00050);calmodulin(PC00061);non-receptor serine/threonine protein kinase(PC00167);transfer/carrier protein(PC00219)	Caenorhabditis elegans
CAEEL|WormBase=WBGene00010408|UniProtKB=Q9NCE1	179540	O-acyltransferase;mboa-2;ortholog	DIACYLGLYCEROL O-ACYLTRANSFERASE 1 (PTHR10408:SF7)	acyltransferase(PC00042)	Caenorhabditis elegans
CAEEL|WormBase=WBGene00018516|UniProtKB=Q20483	180844	GAK Homolog;gakh-1;ortholog	GAK HOMOLOG (PTHR22967:SF93)	non-receptor serine/threonine protein kinase(PC00167)	Caenorhabditis elegans
CAEEL|WormBase=WBGene00004338|UniProtKB=O44175	176946	RFC (DNA replication factor) family;rfc-2;ortholog	REPLICATION FACTOR C SUBUNIT 2 (PTHR11669:SF5)	DNA-directed DNA polymerase(PC00018);nucleotidyltransferase(PC00174)	Caenorhabditis elegans
CAEEL|WormBase=WBGene00004743|UniProtKB=G5EED5	171756	Secretory carrier-associated membrane protein;scm-1;ortholog	SECRETORY CARRIER-ASSOCIATED MEMBRANE PROTEIN (PTHR10687:SF2)	transfer/carrier protein(PC00219);transferase(PC00220)	Caenorhabditis elegans
CAEEL|WormBase=WBGene00001630|UniProtKB=Q95ZJ1	176736	Polypeptide N-acetylgalactosaminyltransferase 5;gly-5;ortholog	POLYPEPTIDE N-ACETYLGALACTOSAMINYLTRANSFERASE 1 (PTHR11675:SF43)	glycosyltransferase(PC00111)	Caenorhabditis elegans
CAEEL|WormBase=WBGene00011304|UniProtKB=Q8I113	174623	MAP kinase-interacting serine/threonine-protein kinase mnk-1;mnk-1;ortholog	LD17393P (PTHR24349:SF317)	non-motor microtubule binding protein(PC00166);non-receptor serine/threonine protein kinase(PC00167)	Caenorhabditis elegans
CAEEL|WormBase=WBGene00044069|UniProtKB=Q21484	176458	Histone AcetylTransferase;hat-1;ortholog	HISTONE ACETYLTRANSFERASE TYPE B CATALYTIC SUBUNIT (PTHR12046:SF0)	acetyltransferase(PC00038)	Caenorhabditis elegans
CAEEL|WormBase=WBGene00017950|UniProtKB=Q8MYQ1	175977	Putative serine/threonine-protein kinase F31E3.2;F31E3.2;ortholog	SERINE/THREONINE-PROTEIN KINASE F31E3.2-RELATED (PTHR24355:SF1)	non-receptor serine/threonine protein kinase(PC00167)	Caenorhabditis elegans
CAEEL|WormBase=WBGene00003401|UniProtKB=P39745	175545	Mitogen-activated protein kinase mpk-1;mpk-1;ortholog	MITOGEN-ACTIVATED PROTEIN KINASE (PTHR24055:SF158)	non-receptor serine/threonine protein kinase(PC00167)	Caenorhabditis elegans
CAEEL|WormBase=WBGene00009176|UniProtKB=P91851	172754	Nicotinamide/nicotinic acid mononucleotide adenylyltransferase 2;nmat-2;ortholog	NICOTINAMIDE/NICOTINIC ACID MONONUCLEOTIDE ADENYLYLTRANSFERASE 2 (PTHR12039:SF0)	nucleotidyltransferase(PC00174)	Caenorhabditis elegans
CAEEL|WormBase=WBGene00004033|UniProtKB=P90980	181166	Protein kinase C-like 2;pkc-2;ortholog	PROTEIN KINASE C, BRAIN ISOZYME-RELATED (PTHR24356:SF331)	annexin(PC00050);calmodulin(PC00061);non-receptor serine/threonine protein kinase(PC00167);transfer/carrier protein(PC00219)	Caenorhabditis elegans
CAEEL|WormBase=WBGene00006483|UniProtKB=H2KZC9	177667	Diacylglycerol kinase;dgk-4;ortholog	DIACYLGLYCEROL KINASE ETA (PTHR11255:SF80)	kinase(PC00137)	Caenorhabditis elegans
CAEEL|WormBase=WBGene00009277|UniProtKB=Q7YX26	3565178	Uncharacterized protein;CELE_F30F8.10;ortholog	N-ALPHA-ACETYLTRANSFERASE 60 (PTHR14744:SF15)	acetyltransferase(PC00038);acyltransferase(PC00042)	Caenorhabditis elegans
CAEEL|WormBase=WBGene00009512|UniProtKB=O17860	174706	Uncharacterized protein;bigr-1;ortholog	ACYL-COA DEHYDROGENASE FAMILY MEMBER 10 (PTHR45741:SF3)	dehydrogenase(PC00092);oxidase(PC00175);transferase(PC00220)	Caenorhabditis elegans
CAEEL|WormBase=WBGene00000407|UniProtKB=G5ECH7	176774	Cyclin-dependent-like kinase 5;cdk-5;ortholog	CYCLIN-DEPENDENT-LIKE KINASE 5 (PTHR24056:SF46)	non-receptor serine/threonine protein kinase(PC00167);non-receptor tyrosine protein kinase(PC00168)	Caenorhabditis elegans
CAEEL|WormBase=WBGene00006786|UniProtKB=Q23023	180311	Serine/threonine-protein kinase unc-51;unc-51;ortholog	AUTOPHAGY-RELATED 1, ISOFORM B (PTHR24348:SF22)	non-receptor serine/threonine protein kinase(PC00167)	Caenorhabditis elegans
CAEEL|WormBase=WBGene00011283|UniProtKB=Q22033	179768	Uncharacterized protein;CELE_R90.1;ortholog	TAU-TUBULIN KINASE HOMOLOG ASATOR (PTHR11909:SF19)	non-receptor serine/threonine protein kinase(PC00167)	Caenorhabditis elegans
CAEEL|WormBase=WBGene00004719|UniProtKB=Q19469	181471	Serine/threonine kinase SAD-1;sad-1;ortholog	SUGAR-FREE FROSTING, ISOFORM A (PTHR24343:SF223)	non-receptor serine/threonine protein kinase(PC00167)	Caenorhabditis elegans
CAEEL|WormBase=WBGene00011932|UniProtKB=Q9XVI6	179884	Serine palmitoyltransferase 3;sptl-3;ortholog	SERINE PALMITOYLTRANSFERASE 3 (PTHR13693:SF54)	transaminase(PC00216)	Caenorhabditis elegans
CAEEL|WormBase=WBGene00015266|UniProtKB=Q965N3	175269	Uncharacterized protein;BE0003N10.1;ortholog	POLYRIBONUCLEOTIDE NUCLEOTIDYLTRANSFERASE 1, MITOCHONDRIAL (PTHR11252:SF0)	esterase(PC00097);exoribonuclease(PC00099);nucleotidyltransferase(PC00174)	Caenorhabditis elegans
CAEEL|WormBase=WBGene00012983|UniProtKB=Q9U296	175079	Malic enzyme;men-1;ortholog	MALIC ENZYME (PTHR23406:SF34)	acyltransferase(PC00042);decarboxylase(PC00089);dehydrogenase(PC00092)	Caenorhabditis elegans
CAEEL|WormBase=WBGene00020631|UniProtKB=O02167	188657	Kinase;CELE_T20F7.3;ortholog	KINASE (PTHR12400:SF41)	kinase(PC00137)	Caenorhabditis elegans
CAEEL|WormBase=WBGene00018409|UniProtKB=P34429	176131	Probable replication factor C subunit 5;F44B9.8;ortholog	REPLICATION FACTOR C SUBUNIT 5 (PTHR11669:SF9)	DNA-directed DNA polymerase(PC00018);nucleotidyltransferase(PC00174)	Caenorhabditis elegans
CAEEL|WormBase=WBGene00006863|UniProtKB=H2KYQ5	180644	Glycogenin-1;gyg-1;ortholog	GLYCOGENIN-1 (PTHR11183:SF123)	glycosyltransferase(PC00111)	Caenorhabditis elegans
CAEEL|WormBase=WBGene00002147|UniProtKB=Q09499	174305	Serine/threonine-protein kinase/endoribonuclease ire-1;ire-1;ortholog	INOSITOL-REQUIRING ENZYME-1 (PTHR13954:SF6)	protein kinase(PC00193)	Caenorhabditis elegans
CAEEL|WormBase=WBGene00000833|UniProtKB=P34575	176437	Probable citrate synthase, mitochondrial;cts-1;ortholog	CITRATE SYNTHASE, MITOCHONDRIAL (PTHR11739:SF8)	lyase(PC00144);transferase(PC00220)	Caenorhabditis elegans
CAEEL|WormBase=WBGene00013024|UniProtKB=G5EC25	179935	Choline/EthanolaminePhosphoTransferase;cept-2;ortholog	BB IN A BOXCAR, ISOFORM C (PTHR10414:SF48)	transferase(PC00220)	Caenorhabditis elegans
CAEEL|WormBase=WBGene00019628|UniProtKB=Q09408	175708	Poly(U) Polymerase;pup-2;ortholog	POLY(U) POLYMERASE (PTHR12271:SF95)	nucleotidyltransferase(PC00174)	Caenorhabditis elegans
CAEEL|WormBase=WBGene00004056|UniProtKB=Q8MXI4	177611	Mitogen-activated protein kinase pmk-2;pmk-2;ortholog	MITOGEN-ACTIVATED PROTEIN KINASE PMK-2 (PTHR24055:SF154)	non-receptor serine/threonine protein kinase(PC00167)	Caenorhabditis elegans
CAEEL|WormBase=WBGene00000226|UniProtKB=Q22258	179352	Serine/threonine-protein kinase ATR;atl-1;ortholog	SERINE/THREONINE-PROTEIN KINASE ATR (PTHR11139:SF69)	non-receptor serine/threonine protein kinase(PC00167);nucleic acid binding(PC00171);nucleotide kinase(PC00172)	Caenorhabditis elegans
CAEEL|WormBase=WBGene00007914|UniProtKB=Q95ZX6	183194	Histone acetyltransferase;mys-4;ortholog	HISTONE ACETYLTRANSFERASE (PTHR10615:SF164)	acetyltransferase(PC00038);chromatin/chromatin-binding protein(PC00077);zinc finger transcription factor(PC00244)	Caenorhabditis elegans
CAEEL|WormBase=WBGene00013917|UniProtKB=Q23357	181247	Cyclin-Dependent Kinase family;cdk-11.2;ortholog	CYCLIN-DEPENDENT KINASE FAMILY (PTHR24056:SF166)	non-receptor serine/threonine protein kinase(PC00167);non-receptor tyrosine protein kinase(PC00168)	Caenorhabditis elegans
CAEEL|WormBase=WBGene00003965|UniProtKB=Q9Y1J3	180475	3-phosphoinositide-dependent protein kinase 1;pdk-1;ortholog	3-PHOSPHOINOSITIDE-DEPENDENT PROTEIN KINASE 1 (PTHR24356:SF309)	annexin(PC00050);calmodulin(PC00061);non-receptor serine/threonine protein kinase(PC00167);transfer/carrier protein(PC00219)	Caenorhabditis elegans
CAEEL|WormBase=WBGene00005026|UniProtKB=Q09363	174517	Galactosylgalactosylxylosylprotein 3-beta-glucuronosyltransferase sqv-8;sqv-8;ortholog	GALACTOSYLGALACTOSYLXYLOSYLPROTEIN 3-BETA-GLUCURONOSYLTRANSFERASE I (PTHR10896:SF55)	glycosyltransferase(PC00111)	Caenorhabditis elegans
CAEEL|WormBase=WBGene00020107|UniProtKB=Q6AHR3	176016	Uncharacterized protein;CELE_R151.2;ortholog	RIBOSE-PHOSPHATE PYROPHOSPHOKINASE 2-RELATED (PTHR10210:SF32)	carbohydrate kinase(PC00065);ligase(PC00142);nucleotide kinase(PC00172)	Caenorhabditis elegans
CAEEL|WormBase=WBGene00004879|UniProtKB=O01510	172418	Serine/threonine-protein kinase smg-1;smg-1;ortholog	SERINE/THREONINE-PROTEIN KINASE SMG1 (PTHR11139:SF71)	non-receptor serine/threonine protein kinase(PC00167);nucleic acid binding(PC00171);nucleotide kinase(PC00172)	Caenorhabditis elegans
CAEEL|WormBase=WBGene00003916|UniProtKB=Q9TW45	179912	Serine/threonine-protein kinase par-1;par-1;ortholog	NON-SPECIFIC SERINE/THREONINE PROTEIN KINASE (PTHR24346:SF30)	non-receptor serine/threonine protein kinase(PC00167)	Caenorhabditis elegans
CAEEL|WormBase=WBGene00000498|UniProtKB=Q9N3Z3	3565921	Serine/threonine-protein kinase chk-1;chk-1;ortholog	SERINE/THREONINE-PROTEIN KINASE CHK1 (PTHR24343:SF331)	non-receptor serine/threonine protein kinase(PC00167)	Caenorhabditis elegans
CAEEL|WormBase=WBGene00013709|UniProtKB=Q8WQ99	172891	Casein kinase I gamma;csnk-1;ortholog	GILGAMESH, ISOFORM L (PTHR11909:SF155)	non-receptor serine/threonine protein kinase(PC00167)	Caenorhabditis elegans
CAEEL|WormBase=WBGene00012907|UniProtKB=Q9U2F2	174912	Carnitine Palmitoyl Transferase;cpt-1;ortholog	CARNITINE PALMITOYLTRANSFERASE I (PTHR22589:SF31)	acetyltransferase(PC00038);acyltransferase(PC00042)	Caenorhabditis elegans
CAEEL|WormBase=WBGene00000510|UniProtKB=Q22942	180703	Choline kinase A2;cka-2;ortholog	CHOLINE KINASE A2 (PTHR22603:SF76)	kinase(PC00137)	Caenorhabditis elegans
CAEEL|WormBase=WBGene00021754|UniProtKB=Q8WTL6	175189	Uncharacterized protein;hpo-29;ortholog	N(ALPHA)-ACETYLTRANSFERASE 15/16, ISOFORM A (PTHR22767:SF2)	acetyltransferase(PC00038)	Caenorhabditis elegans
CAEEL|WormBase=WBGene00003400|UniProtKB=O44997	187322	Death-associated protein kinase dapk-1;dapk-1;ortholog	DEATH-ASSOCIATED PROTEIN KINASE DAPK-1 (PTHR24342:SF14)	non-receptor serine/threonine protein kinase(PC00167)	Caenorhabditis elegans
CAEEL|WormBase=WBGene00006814|UniProtKB=H2KYA5	177514	Uncharacterized protein;unc-82;ortholog	SUBFAMILY NOT NAMED (PTHR24343:SF304)	non-receptor serine/threonine protein kinase(PC00167)	Caenorhabditis elegans
CAEEL|WormBase=WBGene00045419|UniProtKB=K8ERR8	3565873	Histone acetyltransferase;lsy-12;ortholog	HISTONE ACETYLTRANSFERASE KAT7 (PTHR10615:SF102)	acetyltransferase(PC00038);chromatin/chromatin-binding protein(PC00077);zinc finger transcription factor(PC00244)	Caenorhabditis elegans
CAEEL|WormBase=WBGene00021352|UniProtKB=X5LPX5	171770	Phosphocholine CYtidylylTransferase;pcyt-2.1;ortholog	ETHANOLAMINE-PHOSPHATE CYTIDYLYLTRANSFERASE (PTHR45780:SF2)	nucleotidyltransferase(PC00174)	Caenorhabditis elegans
CAEEL|WormBase=WBGene00000763|UniProtKB=O18235	178403	Ubiquinone biosynthesis O-methyltransferase, mitochondrial;coq-3;ortholog	UBIQUINONE BIOSYNTHESIS O-METHYLTRANSFERASE, MITOCHONDRIAL (PTHR43464:SF19)	methyltransferase(PC00155)	Caenorhabditis elegans
CAEEL|WormBase=WBGene00014081|UniProtKB=O62519	191426	Kinase;ipmk-1;ortholog	INOSITOL POLYPHOSPHATE MULTIKINASE (PTHR12400:SF51)	kinase(PC00137)	Caenorhabditis elegans
CAEEL|WormBase=WBGene00021012|UniProtKB=U4PR86	176877	Maternal embryonic leucine zipper kinase;pig-1;ortholog	MATERNAL EMBRYONIC LEUCINE ZIPPER KINASE (PTHR24343:SF121)	non-receptor serine/threonine protein kinase(PC00167)	Caenorhabditis elegans
CAEEL|WormBase=WBGene00003954|UniProtKB=Q27873	178981	Protein-L-isoaspartate O-methyltransferase;pcm-1;ortholog	PROTEIN-L-ISOASPARTATE(D-ASPARTATE) O-METHYLTRANSFERASE (PTHR11579:SF0)	methyltransferase(PC00155)	Caenorhabditis elegans
CAEEL|WormBase=WBGene00002210|UniProtKB=Q21017	180574	Serine/threonine-protein kinase kin-29;kin-29;ortholog	FI24002P1 (PTHR24343:SF299)	non-receptor serine/threonine protein kinase(PC00167)	Caenorhabditis elegans
CAEEL|WormBase=WBGene00003394|UniProtKB=Q22329	180904	Protein-serine O-palmitoleoyltransferase porcupine;mom-1;ortholog	PROTEIN-SERINE O-PALMITOLEOYLTRANSFERASE PORCUPINE (PTHR13906:SF12)	acetyltransferase(PC00038)	Caenorhabditis elegans
CAEEL|WormBase=WBGene00007089|UniProtKB=Q17413	178160	Probable uridine-cytidine kinase;B0001.4;ortholog	URIDINE-CYTIDINE KINASE-RELATED (PTHR10285:SF145)	glycosyltransferase(PC00111);nucleotide kinase(PC00172)	Caenorhabditis elegans
CAEEL|WormBase=WBGene00004980|UniProtKB=Q03563	176328	Serine/threonine-protein kinase spk-1;spk-1;ortholog	SR PROTEIN KINASE, ISOFORM D-RELATED (PTHR24055:SF0)	non-receptor serine/threonine protein kinase(PC00167)	Caenorhabditis elegans
CAEEL|WormBase=WBGene00021703|UniProtKB=Q9N3N3	190055	Carnitine Palmitoyl Transferase;cpt-3;ortholog	CARNITINE PALMITOYL TRANSFERASE (PTHR22589:SF54)	acetyltransferase(PC00038);acyltransferase(PC00042)	Caenorhabditis elegans
CAEEL|WormBase=WBGene00007824|UniProtKB=O45279	178524	DihydroLipoyllysine-residue AcetylTransferase;dlat-2;ortholog	DIHYDROLIPOYLLYSINE-RESIDUE ACETYLTRANSFERASE (PTHR23151:SF81)	acetyltransferase(PC00038);acyltransferase(PC00042)	Caenorhabditis elegans
CAEEL|WormBase=WBGene00008095|UniProtKB=Q93372	183461	Uncharacterized protein;C44H4.6;ortholog	SUBFAMILY NOT NAMED (PTHR24057:SF20)	non-receptor serine/threonine protein kinase(PC00167)	Caenorhabditis elegans
CAEEL|WormBase=WBGene00020142|UniProtKB=Q95ZQ4	181727	5'-AMP-activated protein kinase catalytic subunit alpha-2;aak-2;ortholog	NON-SPECIFIC SERINE/THREONINE PROTEIN KINASE (PTHR24343:SF312)	non-receptor serine/threonine protein kinase(PC00167)	Caenorhabditis elegans
CAEEL|WormBase=WBGene00020185|UniProtKB=P91427	171965	Probable phosphoglycerate kinase;pgk-1;ortholog	PHOSPHOGLYCERATE KINASE (PTHR11406:SF0)	carbohydrate kinase(PC00065)	Caenorhabditis elegans
CAEEL|WormBase=WBGene00017725|UniProtKB=Q94193	184871	Uncharacterized protein;CELE_F22H10.1;ortholog	SUBFAMILY NOT NAMED (PTHR11909:SF171)	non-receptor serine/threonine protein kinase(PC00167)	Caenorhabditis elegans
CAEEL|WormBase=WBGene00008948|UniProtKB=H2L2A8	178181	Uridine kinase;CELE_F19B6.1;ortholog	KRISHAH, ISOFORM B-RELATED (PTHR10285:SF70)	glycosyltransferase(PC00111);nucleotide kinase(PC00172)	Caenorhabditis elegans
CAEEL|WormBase=WBGene00018604|UniProtKB=Q9GPA0	181007	UDP-Glucose Glycoprotein glucosylTransferase;uggt-1;ortholog	UDP-GLUCOSE:GLYCOPROTEIN GLUCOSYLTRANSFERASE (PTHR11226:SF0)	glycosyltransferase(PC00111)	Caenorhabditis elegans
CAEEL|WormBase=WBGene00010984|UniProtKB=Q8MP09	181633	Nematode Kynurenine AminoTransferase;nkat-3;ortholog	NEMATODE KYNURENINE AMINOTRANSFERASE (PTHR43807:SF20)	transaminase(PC00216)	Caenorhabditis elegans
CAEEL|WormBase=WBGene00007150|UniProtKB=P90731	179795	ATP-citrate synthase;acly-2;ortholog	ATP-CITRATE SYNTHASE (PTHR23118:SF0)	ligase(PC00142);lyase(PC00144);transferase(PC00220)	Caenorhabditis elegans
CAEEL|WormBase=WBGene00003961|UniProtKB=Q8I7M8	177615	Cyclin-dependent kinase 17;pct-1;ortholog	CYCLIN-DEPENDENT KINASE 17 (PTHR24056:SF246)	non-receptor serine/threonine protein kinase(PC00167);non-receptor tyrosine protein kinase(PC00168)	Caenorhabditis elegans
CAEEL|WormBase=WBGene00016995|UniProtKB=P53585	180485	Probable ATP-citrate synthase;acly-1;ortholog	ATP-CITRATE SYNTHASE-RELATED (PTHR23118:SF4)	ligase(PC00142);lyase(PC00144);transferase(PC00220)	Caenorhabditis elegans
CAEEL|WormBase=WBGene00010037|UniProtKB=P34442	176323	Probable tyrosine-protein phosphatase F54C8.4;F54C8.4;ortholog	TYROSINE-PROTEIN PHOSPHATASE F54C8.4-RELATED (PTHR10367:SF16)	nucleotidyltransferase(PC00174);phosphatase(PC00181)	Caenorhabditis elegans

## Sheet: Transporter
CAEEL|WormBase=WBGene00008265|UniProtKB=O17697	183736	KCNN (Potassium K ChaNNel, calcium activated)-Like;kcnl-4;ortholog	KCNN (POTASSIUM K CHANNEL, CALCIUM ACTIVATED)-LIKE (PTHR10153:SF36)	voltage-gated potassium channel(PC00242)	Caenorhabditis elegans
CAEEL|WormBase=WBGene00008000|UniProtKB=Q03567	176317	Uncharacterized transporter slc-17.2;C38C10.2;ortholog	SUBFAMILY NOT NAMED (PTHR11662:SF428)	cation transporter(PC00068)	Caenorhabditis elegans
CAEEL|WormBase=WBGene00001512|UniProtKB=O18276	176691	Gamma-aminobutyric acid receptor subunit beta;gab-1;ortholog	GAMMA-AMINOBUTYRIC ACID RECEPTOR SUBUNIT BETA-LIKE (PTHR18945:SF816)	GABA receptor(PC00023);acetylcholine receptor(PC00037)	Caenorhabditis elegans
CAEEL|WormBase=WBGene00017069|UniProtKB=Q19012	183965	Translocase, Inner Mitochondrial Membrane;timm-17b.2;ortholog	AT05822P-RELATED (PTHR10485:SF0)	mitochondrial carrier protein(PC00158);transfer/carrier protein(PC00219)	Caenorhabditis elegans
CAEEL|WormBase=WBGene00010421|UniProtKB=O62286	186798	SLC (SoLute Carrier) homolog;slc-36.4;ortholog	SLC (SOLUTE CARRIER) HOMOLOG (PTHR22950:SF193)	amino acid transporter(PC00046)	Caenorhabditis elegans
CAEEL|WormBase=WBGene00009499|UniProtKB=Q93690	172749	Equilibrative Nucleoside Transporter;ent-6;ortholog	EQUILIBRATIVE NUCLEOSIDE TRANSPORTER 1, ISOFORM A (PTHR10332:SF60)	transporter(PC00227)	Caenorhabditis elegans
CAEEL|WormBase=WBGene00000049|UniProtKB=Q21645	191598	AcetylCholine Receptor;acr-10;ortholog	ACETYLCHOLINE RECEPTOR (PTHR18945:SF555)	GABA receptor(PC00023);acetylcholine receptor(PC00037)	Caenorhabditis elegans
CAEEL|WormBase=WBGene00015181|UniProtKB=Q11073	181158	Uncharacterized protein B0416.5;B0416.5;ortholog	SUBFAMILY NOT NAMED (PTHR10924:SF29)	transporter(PC00227)	Caenorhabditis elegans
CAEEL|WormBase=WBGene00003408|UniProtKB=Q20943	180408	Uncharacterized protein;mrp-2;ortholog	CANALICULAR MULTISPECIFIC ORGANIC ANION TRANSPORTER 2 (PTHR24223:SF350)	ATP-binding cassette (ABC) transporter(PC00003)	Caenorhabditis elegans
CAEEL|WormBase=WBGene00006921|UniProtKB=Q19626	180692	Probable V-type proton ATPase subunit B;vha-12;ortholog	V-TYPE PROTON ATPASE SUBUNIT B (PTHR43389:SF4)	ATP synthase(PC00002);DNA binding protein(PC00009);anion channel(PC00049);hydrolase(PC00121);ligand-gated ion channel(PC00141)	Caenorhabditis elegans
CAEEL|WormBase=WBGene00019346|UniProtKB=X5LQ17	180742	Solute carrier organic anion transporter family member;CELE_K02G10.5;ortholog	SOLUTE CARRIER ORGANIC ANION TRANSPORTER FAMILY MEMBER (PTHR11388:SF85)	protease inhibitor(PC00191);transporter(PC00227)	Caenorhabditis elegans
CAEEL|WormBase=WBGene00007176|UniProtKB=G5EFI1	180280	KCNN (Potassium K ChaNNel, calcium activated)-Like;kcnl-1;ortholog	KCNN (POTASSIUM K CHANNEL, CALCIUM ACTIVATED)-LIKE (PTHR10153:SF34)	voltage-gated potassium channel(PC00242)	Caenorhabditis elegans
CAEEL|WormBase=WBGene00017580|UniProtKB=P54245	181155	Ligand-gated ion channel 4;lgc-4;ortholog	LIGAND-GATED ION CHANNEL 4 (PTHR18945:SF828)	GABA receptor(PC00023);acetylcholine receptor(PC00037)	Caenorhabditis elegans
CAEEL|WormBase=WBGene00003412|UniProtKB=Q19625	180691	Uncharacterized protein;mrp-6;ortholog	LD28489P-RELATED (PTHR24223:SF271)	ATP-binding cassette (ABC) transporter(PC00003)	Caenorhabditis elegans
CAEEL|WormBase=WBGene00003986|UniProtKB=H2L0E6	180766	MonoCarboxylate Transporter family;mct-4;ortholog	MONOCARBOXYLATE TRANSPORTER FAMILY (PTHR11360:SF263)	transporter(PC00227)	Caenorhabditis elegans
CAEEL|WormBase=WBGene00008997|UniProtKB=G5EE87	184752	Ligand-Gated ion Channel;lgc-31;ortholog	NEURONAL ACETYLCHOLINE RECEPTOR SUBUNIT ALPHA-9 (PTHR18945:SF489)	GABA receptor(PC00023);acetylcholine receptor(PC00037)	Caenorhabditis elegans
CAEEL|WormBase=WBGene00006774|UniProtKB=Q23022	172105	Acetylcholine receptor subunit alpha-type unc-38;unc-38;ortholog	ACETYLCHOLINE RECEPTOR SUBUNIT ALPHA-TYPE UNC-38 (PTHR18945:SF806)	GABA receptor(PC00023);acetylcholine receptor(PC00037)	Caenorhabditis elegans
CAEEL|WormBase=WBGene00014119|UniProtKB=B3WFW5	172739	Transmembrane 9 superfamily member;CELE_ZK858.6;ortholog	TRANSMEMBRANE 9 SUPERFAMILY MEMBER 4 (PTHR10766:SF55)	transporter(PC00227)	Caenorhabditis elegans
CAEEL|WormBase=WBGene00000060|UniProtKB=Q9N5U8	185004	AcetylCholine Receptor;acr-21;ortholog	ACETYLCHOLINE RECEPTOR (PTHR18945:SF783)	GABA receptor(PC00023);acetylcholine receptor(PC00037)	Caenorhabditis elegans
CAEEL|WormBase=WBGene00012915|UniProtKB=Q9U2E2	189960	Ligand-Gated ion Channel;lgc-35;ortholog	LIGAND-GATED ION CHANNEL (PTHR18945:SF834)	GABA receptor(PC00023);acetylcholine receptor(PC00037)	Caenorhabditis elegans
CAEEL|WormBase=WBGene00006466|UniProtKB=Q8WQE7	178278	Uncharacterized protein;tag-115;ortholog	GERMINAL-CENTER ASSOCIATED NUCLEAR PROTEIN (PTHR12436:SF3)	ATP synthase(PC00002);hydrolase(PC00121)	Caenorhabditis elegans
CAEEL|EnsemblGenome=WBGene00000051|UniProtKB=G5EDF1	181475	AcetylCholine Receptor;acr-12;ortholog	ACETYLCHOLINE RECEPTOR (PTHR18945:SF495)	GABA receptor(PC00023);acetylcholine receptor(PC00037)	Caenorhabditis elegans
CAEEL|WormBase=WBGene00015487|UniProtKB=Q11189	175912	28S ribosomal protein S17, mitochondrial;mrps-17;ortholog	28S RIBOSOMAL PROTEIN S17, MITOCHONDRIAL (PTHR24088:SF0)	mitochondrial carrier protein(PC00158);transfer/carrier protein(PC00219)	Caenorhabditis elegans
CAEEL|WormBase=WBGene00006748|UniProtKB=Q21974	177494	Degenerin unc-8;unc-8;ortholog	DEGENERIN UNC-8 (PTHR11690:SF242)	ion channel(PC00133)	Caenorhabditis elegans
CAEEL|WormBase=WBGene00003386|UniProtKB=Q9GQ00	179269	Serotonin-gated chloride channel;mod-1;ortholog	SEROTONIN-GATED CHLORIDE CHANNEL (PTHR18945:SF431)	GABA receptor(PC00023);acetylcholine receptor(PC00037)	Caenorhabditis elegans
CAEEL|WormBase=WBGene00009799|UniProtKB=G5EEX8	181193	Ligand-Gated ion Channel;lgc-47;ortholog	LIGAND-GATED ION CHANNEL (PTHR18945:SF564)	GABA receptor(PC00023);acetylcholine receptor(PC00037)	Caenorhabditis elegans
CAEEL|WormBase=WBGene00010275|UniProtKB=Q21005	177799	Acetylcholine-gated chloride channel subunit acc-1;acc-1;ortholog	ACETYLCHOLINE-GATED CHLORIDE CHANNEL SUBUNIT ACC-1 (PTHR18945:SF776)	GABA receptor(PC00023);acetylcholine receptor(PC00037)	Caenorhabditis elegans
CAEEL|WormBase=WBGene00008052|UniProtKB=Q09500	174308	Cystinosin homolog;ctns-1;ortholog	CYSTINOSIN (PTHR13131:SF5)	amino acid transporter(PC00046)	Caenorhabditis elegans
CAEEL|WormBase=WBGene00016258|UniProtKB=Q95YD5	172134	V-type proton ATPase subunit;vha-16;ortholog	V-TYPE PROTON ATPASE SUBUNIT D 1 (PTHR11028:SF0)	ATP synthase(PC00002);hydrolase(PC00121)	Caenorhabditis elegans
CAEEL|WormBase=WBGene00000170|UniProtKB=Q17571	174467	AQuaPorin or aquaglyceroporin related;aqp-2;ortholog	AQUAPORIN OR AQUAGLYCEROPORIN RELATED (PTHR43829:SF10)	transporter(PC00227)	Caenorhabditis elegans
CAEEL|WormBase=WBGene00000232|UniProtKB=Q95Q97	172270	Uncharacterized protein;avr-14;ortholog	SUBFAMILY NOT NAMED (PTHR18945:SF827)	GABA receptor(PC00023);acetylcholine receptor(PC00037)	Caenorhabditis elegans
CAEEL|WormBase=WBGene00010701|UniProtKB=Q93871	181648	Equilibrative Nucleoside Transporter;ent-2;ortholog	EQUILIBRATIVE NUCLEOSIDE TRANSPORTER (PTHR10332:SF23)	transporter(PC00227)	Caenorhabditis elegans
CAEEL|WormBase=WBGene00008857|UniProtKB=Q9XVQ2	173041	Translocase, Inner Mitochondrial Membrane;timm-23;ortholog	MITOCHONDRIAL IMPORT INNER MEMBRANE TRANSLOCASE SUBUNIT TIM23-RELATED (PTHR15371:SF0)	amino acid transporter(PC00046)	Caenorhabditis elegans
CAEEL|WormBase=WBGene00000229|UniProtKB=P46561	175716	ATP synthase subunit beta, mitochondrial;atp-2;ortholog	ATP SYNTHASE SUBUNIT BETA, MITOCHONDRIAL (PTHR15184:SF44)	ATP synthase(PC00002);DNA binding protein(PC00009);anion channel(PC00049);ligand-gated ion channel(PC00141);protease(PC00190)	Caenorhabditis elegans
CAEEL|WormBase=WBGene00017663|UniProtKB=Q19676	174201	Uncharacterized protein;CELE_F21D12.3;ortholog	VACUOLAR AMINO ACID TRANSPORTER 1 (PTHR22950:SF339)	amino acid transporter(PC00046)	Caenorhabditis elegans
CAEEL|WormBase=WBGene00004976|UniProtKB=G5EF09	175446	TRP homologous cation channel protein;spe-41;ortholog	TRP HOMOLOGOUS CATION CHANNEL PROTEIN (PTHR10117:SF50)	ion channel(PC00133)	Caenorhabditis elegans
CAEEL|WormBase=WBGene00003799|UniProtKB=Q9BKT9	171774	Nuclear pore protein;npp-13;ortholog	NUCLEAR PORE COMPLEX PROTEIN NUP93 (PTHR11225:SF4)	transporter(PC00227)	Caenorhabditis elegans
CAEEL|WormBase=WBGene00003787|UniProtKB=Q9U3B9	177836	Nuclear Pore complex Protein;npp-1;ortholog	NUCLEOPORIN P54 (PTHR13000:SF0)	transporter(PC00227)	Caenorhabditis elegans
CAEEL|WormBase=WBGene00013034|UniProtKB=Q9U280	176666	Phospholipid-transporting ATPase tat-1;tat-1;ortholog	PHOSPHOLIPID-TRANSPORTING ATPASE (PTHR24092:SF55)	cation transporter(PC00068);hydrolase(PC00121)	Caenorhabditis elegans
CAEEL|WormBase=WBGene00006919|UniProtKB=P91303	172216	Probable V-type proton ATPase subunit G;vha-10;ortholog	V-TYPE PROTON ATPASE SUBUNIT G (PTHR12713:SF11)	ATP synthase(PC00002);hydrolase(PC00121)	Caenorhabditis elegans
CAEEL|WormBase=WBGene00017119|UniProtKB=O44477	177242	Probable mitochondrial import inner membrane translocase subunit tim-17B.1;timm-17B.1;ortholog	MITOCHONDRIAL IMPORT INNER MEMBRANE TRANSLOCASE SUBUNIT TIM-17B.1-RELATED (PTHR10485:SF12)	mitochondrial carrier protein(PC00158);transfer/carrier protein(PC00219)	Caenorhabditis elegans
CAEEL|WormBase=WBGene00012033|UniProtKB=Q22816	259455	Uncharacterized protein;CELE_T26C5.3;ortholog	ACETYL-COENZYME A TRANSPORTER 1 (PTHR12778:SF9)	transporter(PC00227)	Caenorhabditis elegans
CAEEL|WormBase=WBGene00017642|UniProtKB=Q19643	177589	Uncharacterized protein;CELE_F20D12.2;ortholog	GERMINAL-CENTER ASSOCIATED NUCLEAR PROTEIN (PTHR12436:SF3)	ATP synthase(PC00002);hydrolase(PC00121)	Caenorhabditis elegans
CAEEL|WormBase=WBGene00010813|UniProtKB=G5EED9	175459	PhosphatidylInositol Transfer Protein family;pitp-1;ortholog	PROTEIN RETINAL DEGENERATION B (PTHR10658:SF11)	transfer/carrier protein(PC00219);transporter(PC00227)	Caenorhabditis elegans
CAEEL|WormBase=WBGene00000952|UniProtKB=Q19038	181534	Degenerin del-1;del-1;ortholog	DEGENERIN DEL-1 (PTHR11690:SF185)	ion channel(PC00133)	Caenorhabditis elegans
CAEEL|WormBase=WBGene00006784|UniProtKB=G5ECD3	176472	Ionotropic GABA receptor subunit UNC-49B.3;unc-49;ortholog	IONOTROPIC GABA RECEPTOR SUBUNIT UNC-49B.3 (PTHR18945:SF611)	GABA receptor(PC00023);acetylcholine receptor(PC00037)	Caenorhabditis elegans
CAEEL|WormBase=WBGene00001373|UniProtKB=G5ECJ0	186801	Gamma-aminobutyric acid receptor exp-1;exp-1;ortholog	GAMMA-AMINOBUTYRIC ACID RECEPTOR EXP-1 (PTHR18945:SF523)	GABA receptor(PC00023);acetylcholine receptor(PC00037)	Caenorhabditis elegans
CAEEL|WormBase=WBGene00020507|UniProtKB=Q22494	180534	Probable V-type proton ATPase subunit H 2;vha-15;ortholog	V-TYPE PROTON ATPASE SUBUNIT H (PTHR10698:SF0)	ATP synthase(PC00002);hydrolase(PC00121)	Caenorhabditis elegans
CAEEL|WormBase=WBGene00008551|UniProtKB=Q6BET0	3565335	Ligand-Gated ion Channel;lgc-36;ortholog	LIGAND-GATED ION CHANNEL (PTHR18945:SF830)	GABA receptor(PC00023);acetylcholine receptor(PC00037)	Caenorhabditis elegans
CAEEL|WormBase=WBGene00008252|UniProtKB=Q18771	183708	Uncharacterized protein;C51E3.6;ortholog	SUBFAMILY NOT NAMED (PTHR11119:SF85)	transporter(PC00227)	Caenorhabditis elegans
CAEEL|WormBase=WBGene00004902|UniProtKB=G5EBN9	173493	Sodium- and chloride-dependent betaine transporter;snf-3;ortholog	SODIUM- AND CHLORIDE-DEPENDENT BETAINE TRANSPORTER (PTHR11616:SF20)	cation transporter(PC00068)	Caenorhabditis elegans
CAEEL|WormBase=WBGene00010758|UniProtKB=O45678	175106	Vesicular NUcleotide Transporte;vnut-1;ortholog	SOLUTE CARRIER FAMILY 17 MEMBER 9 (PTHR11662:SF279)	cation transporter(PC00068)	Caenorhabditis elegans
CAEEL|WormBase=WBGene00004060|UniProtKB=F5GUC6	179968	Peroxisomal Membrane Protein related;pmp-3;ortholog	ATP-BINDING CASSETTE SUB-FAMILY D MEMBER 4 (PTHR11384:SF28)	transporter(PC00227)	Caenorhabditis elegans
CAEEL|WormBase=WBGene00016108|UniProtKB=Q18176	182919	Uncharacterized protein;C25G6.3;ortholog	SUBFAMILY NOT NAMED (PTHR24096:SF341)	ligase(PC00142);transporter(PC00227)	Caenorhabditis elegans
CAEEL|WormBase=WBGene00008924|UniProtKB=Q19529	181399	Probable calcium-binding mitochondrial carrier F17E5.2;F17E5.2;ortholog	FI05451P (PTHR24089:SF57)	amino acid transporter(PC00046);calmodulin(PC00061);mitochondrial carrier protein(PC00158);transfer/carrier protein(PC00219)	Caenorhabditis elegans
CAEEL|WormBase=WBGene00013159|UniProtKB=U4PLX3	190214	Uncharacterized protein;CELE_Y53F4B.12;ortholog	CATIONIC AMINO ACID TRANSPORTER-RELATED (PTHR43243:SF17)	amino acid transporter(PC00046)	Caenorhabditis elegans
CAEEL|WormBase=WBGene00017675|UniProtKB=P91269	172109	Uncharacterized protein;CELE_F21F3.6;ortholog	SUBFAMILY NOT NAMED (PTHR12479:SF13)	transporter(PC00227)	Caenorhabditis elegans
CAEEL|WormBase=WBGene00000054|UniProtKB=O16926	191602	AcetylCholine Receptor;acr-15;ortholog	ACETYLCHOLINE RECEPTOR (PTHR18945:SF524)	GABA receptor(PC00023);acetylcholine receptor(PC00037)	Caenorhabditis elegans
CAEEL|WormBase=WBGene00006615|UniProtKB=Q8I6Y9	192056	TRP (Transient receptor potential) channel family;trp-2;ortholog	TRANSIENT RECEPTOR POTENTIAL-GAMMA PROTEIN (PTHR10117:SF54)	ion channel(PC00133)	Caenorhabditis elegans
CAEEL|WormBase=WBGene00022452|UniProtKB=Q9N488	173639	Receptor expression-enhancing protein;CELE_Y110A2AR.1;ortholog	RECEPTOR EXPRESSION-ENHANCING PROTEIN (PTHR12300:SF104)	receptor(PC00197);transporter(PC00227)	Caenorhabditis elegans
CAEEL|Gene_ORFName=CELE_R06A4.4|UniProtKB=A0A131MBF9	175094	IMportin Beta family;imb-2;ortholog	FI21453P1 (PTHR10527:SF3)	transfer/carrier protein(PC00219);transporter(PC00227)	Caenorhabditis elegans
CAEEL|WormBase=WBGene00009632|UniProtKB=Q20332	181328	Protein tweety homolog 1;ttyh-1;ortholog	PROTEIN TWEETY-RELATED (PTHR12424:SF8)	anion channel(PC00049)	Caenorhabditis elegans
CAEEL|WormBase=WBGene00022106|UniProtKB=Q95Y52	175279	Probable ligand-gated ion channel 46;lgc-46;ortholog	LIGAND-GATED ION CHANNEL 46-RELATED (PTHR18945:SF406)	GABA receptor(PC00023);acetylcholine receptor(PC00037)	Caenorhabditis elegans
CAEEL|WormBase=WBGene00000421|UniProtKB=P34358	176352	ABC transporter ced-7;ced-7;ortholog	ABC TRANSPORTER CED-7 (PTHR19229:SF221)	ATP-binding cassette (ABC) transporter(PC00003)	Caenorhabditis elegans
CAEEL|WormBase=WBGene00002974|UniProtKB=Q27218	178269	Acetylcholine receptor subunit beta-type lev-1;lev-1;ortholog	ACETYLCHOLINE RECEPTOR SUBUNIT BETA-TYPE LEV-1 (PTHR18945:SF837)	GABA receptor(PC00023);acetylcholine receptor(PC00037)	Caenorhabditis elegans
CAEEL|WormBase=WBGene00020903|UniProtKB=O01664	189051	Uncharacterized protein;acd-5;ortholog	SUBFAMILY NOT NAMED (PTHR11690:SF231)	ion channel(PC00133)	Caenorhabditis elegans
CAEEL|WormBase=WBGene00017389|UniProtKB=Q19358	3565717	Ligand-Gated ion Channel;lgc-38;ortholog	GAMMA-AMINOBUTYRIC ACID RECEPTOR SUBUNIT BETA (PTHR18945:SF800)	GABA receptor(PC00023);acetylcholine receptor(PC00037)	Caenorhabditis elegans
CAEEL|WormBase=WBGene00017158|UniProtKB=H2KZ29	175829	Uncharacterized protein;hpo-10;ortholog	LEUKOCYTE RECEPTOR CLUSTER MEMBER 8 (PTHR12436:SF4)	ATP synthase(PC00002);hydrolase(PC00121);receptor(PC00197)	Caenorhabditis elegans
CAEEL|WormBase=WBGene00012099|UniProtKB=Q9U358	176778	Acetylcholine-gated ion channel acc-4;acc-4;ortholog	ACETYLCHOLINE-GATED ION CHANNEL ACC-4 (PTHR18945:SF516)	GABA receptor(PC00023);acetylcholine receptor(PC00037)	Caenorhabditis elegans
CAEEL|WormBase=WBGene00011401|UniProtKB=Q8WQD3	176759	Receptor expression-enhancing protein;CELE_T03F6.6;ortholog	RECEPTOR EXPRESSION-ENHANCING PROTEIN (PTHR12300:SF127)	receptor(PC00197);transporter(PC00227)	Caenorhabditis elegans
CAEEL|WormBase=WBGene00021981|UniProtKB=Q9N4R6	178554	Ligand-Gated ion Channel;lgc-26;ortholog	LIGAND-GATED ION CHANNEL (PTHR18945:SF475)	GABA receptor(PC00023);acetylcholine receptor(PC00037)	Caenorhabditis elegans
CAEEL|WormBase=WBGene00000043|UniProtKB=Q93149	180937	Acetylcholine receptor subunit beta-type acr-3;acr-3;ortholog	ACETYLCHOLINE RECEPTOR SUBUNIT BETA-LIKE 1 (PTHR18945:SF784)	GABA receptor(PC00023);acetylcholine receptor(PC00037)	Caenorhabditis elegans
CAEEL|WormBase=WBGene00021125|UniProtKB=A0A078BQJ0	189330	Calcium Channel, Beta subunit;ccb-2;ortholog	CALCIUM CHANNEL, BETA SUBUNIT (PTHR11824:SF10)	voltage-gated calcium channel(PC00240)	Caenorhabditis elegans
CAEEL|WormBase=WBGene00009092|UniProtKB=Q19766	179691	Mitochondrial import receptor subunit TOM20 homolog;tomm-20;ortholog	TRANSLOCASE OF OUTER MITOCHONDRIAL MEMBRANE 20 (PTHR12430:SF0)	transporter(PC00227)	Caenorhabditis elegans
CAEEL|WormBase=WBGene00003153|UniProtKB=Q95XP5	177089	Calcium-transporting ATPase;mca-3;ortholog	CALCIUM-TRANSPORTING ATPASE (PTHR24093:SF369)	cation transporter(PC00068);hydrolase(PC00121);ion channel(PC00133)	Caenorhabditis elegans
CAEEL|WormBase=WBGene00021854|UniProtKB=Q965T2	190268	Uncharacterized protein;CELE_Y54F10AR.1;ortholog	VIBRATOR, ISOFORM B (PTHR10658:SF58)	transfer/carrier protein(PC00219);transporter(PC00227)	Caenorhabditis elegans
CAEEL|WormBase=WBGene00021535|UniProtKB=H2L028	175864	WHiTe (Drosophila) related ABC transporter;wht-7;ortholog	WHITE (DROSOPHILA) RELATED ABC TRANSPORTER (PTHR19241:SF509)	ATP-binding cassette (ABC) transporter(PC00003)	Caenorhabditis elegans
CAEEL|WormBase=WBGene00001586|UniProtKB=Q09453	191636	Glycine receptor subunit beta-type 4;ggr-1;ortholog	GLYCINE RECEPTOR SUBUNIT BETA-TYPE 4 (PTHR18945:SF538)	GABA receptor(PC00023);acetylcholine receptor(PC00037)	Caenorhabditis elegans
CAEEL|WormBase=WBGene00000057|UniProtKB=G5EG72	191604	AcetylCholine Receptor;acr-18;ortholog	ACETYLCHOLINE RECEPTOR (PTHR18945:SF415)	GABA receptor(PC00023);acetylcholine receptor(PC00037)	Caenorhabditis elegans
CAEEL|WormBase=WBGene00000044|UniProtKB=P54246	191596	Acetylcholine receptor subunit alpha-type acr-5;acr-5;ortholog	ACETYLCHOLINE RECEPTOR SUBUNIT ALPHA-TYPE ACR-5 (PTHR18945:SF526)	GABA receptor(PC00023);acetylcholine receptor(PC00037)	Caenorhabditis elegans
CAEEL|WormBase=WBGene00013025|UniProtKB=Q9XW92	3564970	V-type proton ATPase catalytic subunit A;vha-13;ortholog	V-TYPE PROTON ATPASE CATALYTIC SUBUNIT A (PTHR43607:SF1)	ATP synthase(PC00002);DNA binding protein(PC00009);anion channel(PC00049);ligand-gated ion channel(PC00141);protease(PC00190)	Caenorhabditis elegans
CAEEL|WormBase=WBGene00006913|UniProtKB=G5EDB8	174272	VHA-4;vha-4;ortholog	V-TYPE PROTON ATPASE 21 KDA PROTEOLIPID SUBUNIT (PTHR10263:SF18)	ATP synthase(PC00002);hydrolase(PC00121)	Caenorhabditis elegans
CAEEL|WormBase=WBGene00019061|UniProtKB=Q09544	174059	ATP synthase subunit delta, mitochondrial;F58F12.1;ortholog	ATP SYNTHASE SUBUNIT DELTA, MITOCHONDRIAL (PTHR13822:SF7)	ATP synthase(PC00002);hydrolase(PC00121)	Caenorhabditis elegans
CAEEL|WormBase=WBGene00015494|UniProtKB=L8E7Y1	180730	Uncharacterized protein;C05E11.3;ortholog	SUBFAMILY NOT NAMED (PTHR12479:SF11)	transporter(PC00227)	Caenorhabditis elegans
CAEEL|WormBase=WBGene00019841|UniProtKB=Q5ZR77	178869	Uncharacterized protein;CELE_R02F11.3;ortholog	METAL TOLERANCE PROTEIN C3-RELATED (PTHR43840:SF13)	transporter(PC00227)	Caenorhabditis elegans
CAEEL|WormBase=WBGene00009654|UniProtKB=Q20364	185707	SLY1 homolog;sly-1;ortholog	SEC1 FAMILY DOMAIN-CONTAINING PROTEIN 1 (PTHR11679:SF2)	membrane trafficking regulatory protein(PC00151);transporter(PC00227)	Caenorhabditis elegans
CAEEL|WormBase=WBGene00000053|UniProtKB=Q22224	191601	AcetylCholine Receptor;acr-14;ortholog	ACETYLCHOLINE RECEPTOR (PTHR18945:SF441)	GABA receptor(PC00023);acetylcholine receptor(PC00037)	Caenorhabditis elegans
CAEEL|WormBase=WBGene00018757|UniProtKB=Q9UAU3	178639	Uncharacterized protein;tag-304;ortholog	GLUCOSE-INDUCED DEGRADATION PROTEIN 8 HOMOLOG (PTHR12864:SF3)	transfer/carrier protein(PC00219);transporter(PC00227)	Caenorhabditis elegans
CAEEL|WormBase=WBGene00013914|UniProtKB=G5ECN1	176694	Ligand-Gated ion Channel;lgc-37;ortholog	LIGAND-GATED ION CHANNEL (PTHR18945:SF753)	GABA receptor(PC00023);acetylcholine receptor(PC00037)	Caenorhabditis elegans
CAEEL|WormBase=WBGene00002077|UniProtKB=Q9N5V3	3565440	IMportin Beta family;imb-3;ortholog	KARYOPHERIN (IMPORTIN) BETA 3 (PTHR10527:SF5)	G-protein modulator(PC00022);transfer/carrier protein(PC00219);transporter(PC00227)	Caenorhabditis elegans
CAEEL|WormBase=WBGene00012137|UniProtKB=Q22851	189058	Degenerin-like protein asic-2;asic-2;ortholog	DEGENERIN-LIKE PROTEIN ASIC-2 (PTHR11690:SF153)	ion channel(PC00133)	Caenorhabditis elegans
CAEEL|WormBase=WBGene00022453|UniProtKB=Q9N489	173638	NeCAP (NECAP) endocytosis associated protein homolog;ncap-1;ortholog	ADAPTIN EAR-BINDING COAT-ASSOCIATED PROTEIN 1 (PTHR12847:SF3)	ATP-binding cassette (ABC) transporter(PC00003)	Caenorhabditis elegans
CAEEL|WormBase=WBGene00003797|UniProtKB=O01576	171954	Nuclear Pore complex Protein;npp-11;ortholog	NUCLEOPORIN 62-LIKE (PTHR12084:SF0)	transporter(PC00227)	Caenorhabditis elegans
CAEEL|WormBase=WBGene00007646|UniProtKB=Q93235	182726	Sodium/potassium-transporting ATPase subunit beta-1;nkb-1;ortholog	SODIUM/POTASSIUM-TRANSPORTING ATPASE SUBUNIT BETA-1 (PTHR11523:SF30)	cation transporter(PC00068);hydrolase(PC00121)	Caenorhabditis elegans
CAEEL|WormBase=WBGene00006757|UniProtKB=P34815	181030	Putative acetylcholine regulator unc-18;unc-18;ortholog	PROTEIN ROP (PTHR11679:SF30)	membrane trafficking regulatory protein(PC00151);transporter(PC00227)	Caenorhabditis elegans
CAEEL|WormBase=WBGene00016806|UniProtKB=O44798	183650	Uncharacterized protein;C50D2.2;ortholog	CATIONIC AMINO ACID TRANSPORTER 4 (PTHR43243:SF4)	amino acid transporter(PC00046)	Caenorhabditis elegans
CAEEL|WormBase=WBGene00022815|UniProtKB=O01635	191422	Degenerin-like protein asic-1;asic-1;ortholog	DEGENERIN-LIKE PROTEIN ASIC-1 (PTHR11690:SF131)	ion channel(PC00133)	Caenorhabditis elegans
CAEEL|WormBase=WBGene00015942|UniProtKB=Q18071	173966	Organic solute transporter alpha-like protein 2;osta-2;ortholog	TRANSMEMBRANE PROTEIN 184C (PTHR23423:SF10)	transporter(PC00227)	Caenorhabditis elegans
CAEEL|WormBase=WBGene00002079|UniProtKB=Q965V4	171621	EXPOrtin (Nuclear export receptor);xpo-2;ortholog	EXPORTIN-2 (PTHR10997:SF8)	small GTPase(PC00208);transporter(PC00227)	Caenorhabditis elegans
CAEEL|WormBase=WBGene00000368|UniProtKB=O01661	171933	Calcium Channel, Beta subunit;ccb-1;ortholog	CA2+-CHANNEL-PROTEIN-BETA-SUBUNIT, ISOFORM L (PTHR11824:SF5)	voltage-gated calcium channel(PC00240)	Caenorhabditis elegans
CAEEL|WormBase=WBGene00013740|UniProtKB=Q9BHL2	176690	Yeast Homolog UDP-Gal Transporter;hut-1;ortholog	SOLUTE CARRIER FAMILY 35 MEMBER B1 (PTHR10778:SF10)	transporter(PC00227)	Caenorhabditis elegans
CAEEL|WormBase=WBGene00009920|UniProtKB=B3WFV9	172613	Anion exchange protein;abts-1;ortholog	SODIUM BICARBONATE COTRANSPORTER 3 (PTHR11453:SF36)	cation transporter(PC00068)	Caenorhabditis elegans
CAEEL|WormBase=WBGene00003569|UniProtKB=P90858	172834	Na/Ca eXchangers;ncx-4;ortholog	NA/CA EXCHANGERS (PTHR10846:SF63)	transporter(PC00227)	Caenorhabditis elegans
CAEEL|WormBase=WBGene00003792|UniProtKB=P91350	172156	Nuclear Pore complex Protein;npp-6;ortholog	NUCLEAR PORE COMPLEX PROTEIN NUP160 (PTHR21286:SF0)	transporter(PC00227)	Caenorhabditis elegans
CAEEL|WormBase=WBGene00000048|UniProtKB=Q18556	191597	AcetylCholine Receptor;acr-9;ortholog	ACETYLCHOLINE RECEPTOR-RELATED (PTHR18945:SF815)	GABA receptor(PC00023);acetylcholine receptor(PC00037)	Caenorhabditis elegans
CAEEL|WormBase=WBGene00007631|UniProtKB=Q09466	175528	ABC transporter ATP-binding protein/permease wht-3;wht-3;ortholog	ABC TRANSPORTER ATP-BINDING PROTEIN/PERMEASE WHT-3 (PTHR19241:SF171)	ATP-binding cassette (ABC) transporter(PC00003)	Caenorhabditis elegans
CAEEL|WormBase=WBGene00008570|UniProtKB=V6CLK4	172602	KCNN (Potassium K ChaNNel, calcium activated)-Like;kcnl-2;ortholog	SMALL CONDUCTANCE CALCIUM-ACTIVATED POTASSIUM CHANNEL PROTEIN (PTHR10153:SF33)	voltage-gated potassium channel(PC00242)	Caenorhabditis elegans
CAEEL|WormBase=WBGene00007204|UniProtKB=Q17529	182044	Bestrophin homolog 2;best-2;ortholog	BESTROPHIN HOMOLOG 1-RELATED (PTHR10736:SF9)	anion channel(PC00049)	Caenorhabditis elegans
CAEEL|WormBase=WBGene00006472|UniProtKB=O17388	181096	Transmembrane 9 superfamily member;tag-123;ortholog	TRANSMEMBRANE 9 SUPERFAMILY MEMBER (PTHR10766:SF114)	transporter(PC00227)	Caenorhabditis elegans
CAEEL|WormBase=WBGene00020048|UniProtKB=Q95Y94	187855	Ligand-Gated ion Channel;lgc-12;ortholog	ACETYLCHOLINE RECEPTOR (51.1 KD) (ACR-22)-RELATED (PTHR18945:SF529)	GABA receptor(PC00023);acetylcholine receptor(PC00037)	Caenorhabditis elegans
CAEEL|WormBase=WBGene00007388|UniProtKB=Q17766	179544	Folate transporter 1;folt-1;ortholog	FOLATE TRANSPORTER 1 (PTHR10686:SF20)	transporter(PC00227)	Caenorhabditis elegans
CAEEL|WormBase=WBGene00000162|UniProtKB=O16637	173701	AP-3 complex subunit delta;apd-3;ortholog	AP-3 COMPLEX SUBUNIT DELTA-1 (PTHR22781:SF12)	transporter(PC00227)	Caenorhabditis elegans
CAEEL|WormBase=WBGene00015130|UniProtKB=P34260	176221	Vacuolar protein sorting-associated protein 33A;vps-33.1;ortholog	VACUOLAR PROTEIN SORTING-ASSOCIATED PROTEIN 33A (PTHR11679:SF56)	membrane trafficking regulatory protein(PC00151);transporter(PC00227)	Caenorhabditis elegans
CAEEL|WormBase=WBGene00000834|UniProtKB=G5EE14	176770	CU (Copper) ATPase;cua-1;ortholog	ATP7, ISOFORM B (PTHR43520:SF8)	cation transporter(PC00068);hydrolase(PC00121);ion channel(PC00133)	Caenorhabditis elegans

## Sheet: Cytoskeletal protein
CAEEL|WormBase=WBGene00021827|UniProtKB=Q9N3F1	171891	Dynactin subunit 6;dnc-6;ortholog	DYNACTIN SUBUNIT 6 (PTHR13072:SF0)	microtubule binding motor protein(PC00156)	Caenorhabditis elegans
CAEEL|WormBase=WBGene00019361|UniProtKB=O61848	186951	Uncharacterized protein;CELE_K03E5.2;ortholog	SUBFAMILY NOT NAMED (PTHR18959:SF92)	non-motor actin binding protein(PC00165)	Caenorhabditis elegans
CAEEL|WormBase=WBGene00017042|UniProtKB=P34376	183938	Uncharacterized protein D2007.2;D2007.2;ortholog	SUBFAMILY NOT NAMED (PTHR22947:SF1)	cytoskeletal protein(PC00085)	Caenorhabditis elegans
CAEEL|WormBase=WBGene00002224|UniProtKB=H2KYL6	180865	Kinesin-like protein;klp-13;ortholog	KINESIN FAMILY MEMBER 19A (PTHR24115:SF372)	microtubule binding motor protein(PC00156)	Caenorhabditis elegans
CAEEL|WormBase=WBGene00004075|UniProtKB=K8ESK9	176784	Uncharacterized protein;pod-1;ortholog	CORONIN-7 (PTHR10856:SF20)	non-motor actin binding protein(PC00165)	Caenorhabditis elegans
CAEEL|WormBase=WBGene00000200|UniProtKB=P53489	179440	Actin-related protein 2;arx-2;ortholog	ACTIN-RELATED PROTEIN 2 (PTHR11937:SF37)	actin and actin related protein(PC00039)	Caenorhabditis elegans
CAEEL|WormBase=WBGene00008887|UniProtKB=Q19493	172622	Tubulin-specific chaperone D;tbcd-1;ortholog	TUBULIN-SPECIFIC CHAPERONE D (PTHR12658:SF0)	chaperone(PC00072);non-motor microtubule binding protein(PC00166)	Caenorhabditis elegans
CAEEL|WormBase=WBGene00006816|UniProtKB=Q20745	181480	Nuclear migration and anchoring protein unc-84;unc-84;ortholog	KLAROID, ISOFORM A-RELATED (PTHR12911:SF8)	non-motor microtubule binding protein(PC00166)	Caenorhabditis elegans
CAEEL|WormBase=WBGene00011027|UniProtKB=O45706	187604	Uncharacterized protein;CELE_R05D7.2;ortholog	SET (TRITHORAX/POLYCOMB) DOMAIN CONTAINING (PTHR23362:SF0)	actin family cytoskeletal protein(PC00041)	Caenorhabditis elegans
CAEEL|WormBase=WBGene00002222|UniProtKB=Q19633	177685	Kinesin-like protein;klp-11;ortholog	KINESIN-LIKE PROTEIN KLP68D (PTHR24115:SF789)	microtubule binding motor protein(PC00156)	Caenorhabditis elegans
CAEEL|WormBase=WBGene00003183|UniProtKB=P34808	172612	Meiotic spindle formation protein mei-1;mei-1;ortholog	KATANIN P60 ATPASE-CONTAINING SUBUNIT A1 (PTHR23074:SF19)	non-motor microtubule binding protein(PC00166)	Caenorhabditis elegans
CAEEL|WormBase=WBGene00015023|UniProtKB=O61745	172975	Uncharacterized protein;B0205.9;ortholog	SET (TRITHORAX/POLYCOMB) DOMAIN CONTAINING (PTHR23362:SF0)	actin family cytoskeletal protein(PC00041)	Caenorhabditis elegans
CAEEL|WormBase=WBGene00003932|UniProtKB=O16785	176848	Paralyzed arrest at two-fold protein 6;pat-6;ortholog	GH23568P (PTHR12114:SF4)	actin and actin related protein(PC00039)	Caenorhabditis elegans
CAEEL|WormBase=WBGene00002219|UniProtKB=Q9XU12	176511	Kinesin-like protein;klp-7;ortholog	FI21273P1-RELATED (PTHR24115:SF0)	microtubule binding motor protein(PC00156)	Caenorhabditis elegans
CAEEL|WormBase=WBGene00002229|UniProtKB=O45935	176750	Kinesin-like protein;klp-19;ortholog	KINESIN-LIKE PROTEIN NOD-RELATED (PTHR24115:SF742)	microtubule binding motor protein(PC00156)	Caenorhabditis elegans
CAEEL|WormBase=WBGene00004969|UniProtKB=Q9TZI9	171712	Uncharacterized protein;spe-15;ortholog	SUBFAMILY NOT NAMED (PTHR13140:SF719)	G-protein modulator(PC00022);actin binding motor protein(PC00040);cell junction protein(PC00070)	Caenorhabditis elegans
CAEEL|WormBase=WBGene00015017|UniProtKB=H2KY62	172974	Uncharacterized protein;B0205.1;ortholog	SET (TRITHORAX/POLYCOMB) DOMAIN CONTAINING (PTHR23362:SF0)	actin family cytoskeletal protein(PC00041)	Caenorhabditis elegans
CAEEL|WormBase=WBGene00010681|UniProtKB=Q21360	174398	MAP kinase-activated protein kinase mak-1;mak-1;ortholog	MAP KINASE-ACTIVATED PROTEIN KINASE MAK-1 (PTHR24349:SF109)	non-motor microtubule binding protein(PC00166);non-receptor serine/threonine protein kinase(PC00167)	Caenorhabditis elegans
CAEEL|WormBase=WBGene00003175|UniProtKB=P91910	175419	Tubulin alpha-3 chain;mec-12;ortholog	TUBULIN ALPHA-3 CHAIN (PTHR11588:SF290)	tubulin(PC00228)	Caenorhabditis elegans
CAEEL|WormBase=WBGene00000294|UniProtKB=Q95YA9	181729	Adenylyl cyclase-associated protein;cas-1;ortholog	ADENYLYL CYCLASE-ASSOCIATED PROTEIN (PTHR10652:SF0)	actin family cytoskeletal protein(PC00041)	Caenorhabditis elegans
CAEEL|WormBase=WBGene00006957|UniProtKB=Q8MQE6	177616	WASP (Actin cytoskeleton modulator) homolog;wsp-1;ortholog	RE12101P (PTHR23202:SF34)	actin family cytoskeletal protein(PC00041)	Caenorhabditis elegans
CAEEL|WormBase=WBGene00000201|UniProtKB=Q9U1R7	3565442	Actin-related protein 2/3 complex subunit;arx-3;ortholog	ACTIN-RELATED PROTEIN 2/3 COMPLEX SUBUNIT (PTHR10709:SF2)	actin family cytoskeletal protein(PC00041)	Caenorhabditis elegans
CAEEL|WormBase=WBGene00006794|UniProtKB=Q07750	178640	Actin-depolymerizing factor 1, isoforms a/b;unc-60;ortholog	COFILIN/ACTIN-DEPOLYMERIZING FACTOR HOMOLOG (PTHR11913:SF12)	non-motor actin binding protein(PC00165)	Caenorhabditis elegans
CAEEL|WormBase=WBGene00002036|UniProtKB=G8JY81	179321	Heavy chain, Unconventional Myosin;hum-2;ortholog	DILUTE CLASS UNCONVENTIONAL MYOSIN, ISOFORM C (PTHR13140:SF706)	G-protein modulator(PC00022);actin binding motor protein(PC00040);cell junction protein(PC00070)	Caenorhabditis elegans
CAEEL|WormBase=WBGene00007007|UniProtKB=Q965G5	176914	MAP kinase-activated protein kinase mak-2;mak-2;ortholog	MAP KINASE-ACTIVATED PROTEIN KINASE 2 (PTHR24349:SF273)	non-motor microtubule binding protein(PC00166);non-receptor serine/threonine protein kinase(PC00167)	Caenorhabditis elegans
CAEEL|WormBase=WBGene00010796|UniProtKB=P34531	176307	CAP-Gly domain-containing linker protein 1 homolog;clip-1;ortholog	CAP-GLY DOMAIN-CONTAINING LINKER PROTEIN 1 HOMOLOG (PTHR18916:SF71)	chaperone(PC00072);non-motor microtubule binding protein(PC00166)	Caenorhabditis elegans
CAEEL|WormBase=WBGene00006994|UniProtKB=G5EEM5	174350	Zygote defective protein 9;zyg-9;ortholog	ZYGOTE DEFECTIVE PROTEIN 9 (PTHR12609:SF1)	non-motor microtubule binding protein(PC00166)	Caenorhabditis elegans
CAEEL|WormBase=WBGene00002980|UniProtKB=Q09490	174050	Protein lgg-1;lgg-1;ortholog	GABA(A) RECEPTOR-ASSOCIATED PROTEIN B (PTHR10969:SF33)	non-motor microtubule binding protein(PC00166)	Caenorhabditis elegans
CAEEL|WormBase=WBGene00010224|UniProtKB=Q93806	186483	Major sperm protein;CELE_F58A3.4;ortholog	MAJOR SPERM PROTEIN (PTHR22947:SF5)	cytoskeletal protein(PC00085)	Caenorhabditis elegans
CAEEL|WormBase=WBGene00019753|UniProtKB=Q21500	187422	Major sperm protein;CELE_M03E7.1;ortholog	MAJOR SPERM PROTEIN (PTHR22947:SF11)	cytoskeletal protein(PC00085)	Caenorhabditis elegans
CAEEL|WormBase=WBGene00006529|UniProtKB=P34690	173167	Tubulin alpha-2 chain;tba-2;ortholog	TUBULIN ALPHA-2 CHAIN-RELATED (PTHR11588:SF298)	tubulin(PC00228)	Caenorhabditis elegans
CAEEL|WormBase=WBGene00000962|UniProtKB=Q19020	172041	Dynein heavy chain, cytoplasmic;dhc-1;ortholog	CYTOPLASMIC DYNEIN 1 HEAVY CHAIN 1 (PTHR10676:SF314)	hydrolase(PC00121);microtubule binding motor protein(PC00156)	Caenorhabditis elegans
CAEEL|WormBase=WBGene00006795|UniProtKB=Q8I4C9	179976	Uncharacterized protein;unc-61;ortholog	LD28935P-RELATED (PTHR18884:SF69)	cytoskeletal protein(PC00085);small GTPase(PC00208)	Caenorhabditis elegans
CAEEL|WormBase=WBGene00006068|UniProtKB=Q9XWC6	190619	STOmatin;sto-6;ortholog	STOMATIN (PTHR10264:SF32)	cytoskeletal protein(PC00085);protease inhibitor(PC00191)	Caenorhabditis elegans
CAEEL|WormBase=WBGene00003989|UniProtKB=Q9XW16	173161	Profilin-1;pfn-1;ortholog	PROFILIN-1 (PTHR11604:SF6)	non-motor actin binding protein(PC00165)	Caenorhabditis elegans
CAEEL|WormBase=WBGene00002981|UniProtKB=Q23536	177989	Protein lgg-2;lgg-2;ortholog	PROTEIN LGG-2 (PTHR10969:SF37)	non-motor microtubule binding protein(PC00166)	Caenorhabditis elegans
CAEEL|WormBase=WBGene00016706|UniProtKB=Q966P3	180735	Uncharacterized protein;C46C11.3;ortholog	SUBFAMILY NOT NAMED (PTHR10671:SF83)	cytoskeletal protein(PC00085)	Caenorhabditis elegans
CAEEL|WormBase=WBGene00009306|UniProtKB=P91859	173357	Microtubule-associated protein homolog maph-1.1;maph-1.1;ortholog	MICROTUBULE-ASSOCIATED PROTEIN FUTSCH (PTHR13843:SF12)	non-motor microtubule binding protein(PC00166)	Caenorhabditis elegans
CAEEL|WormBase=WBGene00011304|UniProtKB=Q8I113	174623	MAP kinase-interacting serine/threonine-protein kinase mnk-1;mnk-1;ortholog	LD17393P (PTHR24349:SF317)	non-motor microtubule binding protein(PC00166);non-receptor serine/threonine protein kinase(PC00167)	Caenorhabditis elegans
CAEEL|WormBase=WBGene00006999|UniProtKB=Q9U3F4	174951	Zyxin;zyx-1;ortholog	ZYX102 PROTEIN (PTHR24207:SF2)	actin family cytoskeletal protein(PC00041);cell junction protein(PC00070);kinase modulator(PC00140)	Caenorhabditis elegans
CAEEL|WormBase=WBGene00003990|UniProtKB=Q20025	180808	Profilin-2;pfn-2;ortholog	PROFILIN-2 (PTHR11604:SF1)	non-motor actin binding protein(PC00165)	Caenorhabditis elegans
CAEEL|WormBase=WBGene00021334|UniProtKB=Q9BL83	189590	Related to yeast Vacuolar Protein Sorting factor;vps-4;ortholog	VACUOLAR PROTEIN SORTING-ASSOCIATED PROTEIN 4A (PTHR23074:SF83)	non-motor microtubule binding protein(PC00166)	Caenorhabditis elegans
CAEEL|WormBase=WBGene00000293|UniProtKB=P34686	174673	F-actin-capping protein subunit beta;cap-2;ortholog	F-ACTIN-CAPPING PROTEIN SUBUNIT BETA (PTHR10619:SF0)	non-motor actin binding protein(PC00165)	Caenorhabditis elegans
CAEEL|WormBase=WBGene00001130|UniProtKB=P39055	181644	Dynamin;dyn-1;ortholog	DYNAMIN (PTHR11566:SF144)	hydrolase(PC00121);microtubule family cytoskeletal protein(PC00157);small GTPase(PC00208)	Caenorhabditis elegans
CAEEL|WormBase=WBGene00006741|UniProtKB=Q21190	180458	Protein unc-1;unc-1;ortholog	PROTEIN UNC-1 (PTHR10264:SF72)	cytoskeletal protein(PC00085);protease inhibitor(PC00191)	Caenorhabditis elegans
CAEEL|WormBase=WBGene00006761|UniProtKB=G5ED76	177594	UNC-24;unc-24;ortholog	UNC-24 (PTHR10264:SF28)	cytoskeletal protein(PC00085);protease inhibitor(PC00191)	Caenorhabditis elegans
CAEEL|WormBase=WBGene00013038|UniProtKB=Q9XTT4	176672	Anillin-like protein 1;ani-1;ortholog	ANILLIN-LIKE PROTEIN 1 (PTHR21538:SF11)	non-motor actin binding protein(PC00165)	Caenorhabditis elegans
CAEEL|WormBase=WBGene00001333|UniProtKB=G5EBK3	172174	ERM-1B;erm-1;ortholog	MOESIN/EZRIN/RADIXIN HOMOLOG 1 (PTHR23281:SF18)	actin family cytoskeletal protein(PC00041)	Caenorhabditis elegans
CAEEL|WormBase=WBGene00019777|UniProtKB=Q9TYX9	177114	Uncharacterized protein;CELE_M57.1;ortholog	SET (TRITHORAX/POLYCOMB) DOMAIN CONTAINING (PTHR23362:SF0)	actin family cytoskeletal protein(PC00041)	Caenorhabditis elegans
CAEEL|WormBase=WBGene00012004|UniProtKB=Q22752	188872	Dynein light chain roadblock;dyrb-1;ortholog	DYNEIN LIGHT CHAIN ROADBLOCK-RELATED (PTHR10779:SF3)	microtubule family cytoskeletal protein(PC00157)	Caenorhabditis elegans
CAEEL|WormBase=WBGene00002223|UniProtKB=G5EGS3	178057	Kinesin-like protein;klp-12;ortholog	KINESIN-LIKE PROTEIN (PTHR24115:SF837)	microtubule binding motor protein(PC00156)	Caenorhabditis elegans
CAEEL|WormBase=WBGene00016793|UniProtKB=Q9GYR2	183628	Actin-Related Proteins;arp-11;ortholog	ACTIN-RELATED PROTEIN 10 (PTHR11937:SF14)	actin and actin related protein(PC00039)	Caenorhabditis elegans
CAEEL|WormBase=WBGene00001134|UniProtKB=Q18965	174476	Uncharacterized protein;eat-3;ortholog	DYNAMIN-LIKE 120 KDA PROTEIN, MITOCHONDRIAL (PTHR11566:SF67)	hydrolase(PC00121);microtubule family cytoskeletal protein(PC00157);small GTPase(PC00208)	Caenorhabditis elegans
CAEEL|WormBase=WBGene00002230|UniProtKB=Q965T6	3565057	Kinesin-like protein klp-20;klp-20;ortholog	KINESIN-LIKE PROTEIN KIF3A (PTHR24115:SF472)	microtubule binding motor protein(PC00156)	Caenorhabditis elegans
CAEEL|WormBase=WBGene00002182|UniProtKB=H2KZP1	176041	Kinesin-Associated Protein;kap-1;ortholog	KINESIN-ASSOCIATED PROTEIN 3 (PTHR15605:SF2)	microtubule binding motor protein(PC00156)	Caenorhabditis elegans
CAEEL|WormBase=WBGene00016045|UniProtKB=Q8MNV0	179300	Probable spastin homolog spas-1;spas-1;ortholog	SPASTIN (PTHR23074:SF86)	non-motor microtubule binding protein(PC00166)	Caenorhabditis elegans
CAEEL|WormBase=WBGene00006831|UniProtKB=P23678	174144	Kinesin-like protein unc-104;unc-104;ortholog	KINESIN-LIKE PROTEIN UNC-104 (PTHR24115:SF802)	microtubule binding motor protein(PC00156)	Caenorhabditis elegans
CAEEL|WormBase=WBGene00006064|UniProtKB=Q19958	180802	Stomatin-2;sto-2;ortholog	BAND 7 PROTEIN CG42540 (PTHR10264:SF114)	cytoskeletal protein(PC00085);protease inhibitor(PC00191)	Caenorhabditis elegans
CAEEL|WormBase=WBGene00012319|UniProtKB=G5EGD6	180354	Intracelllar PhosphoLipase A family;ipla-3;ortholog	INTRACELLLAR PHOSPHOLIPASE A FAMILY (PTHR24153:SF21)	non-motor actin binding protein(PC00165)	Caenorhabditis elegans
CAEEL|WormBase=WBGene00004913|UniProtKB=Q8MXU3	176987	SyNapsiN;snn-1;ortholog	SYNAPSIN (PTHR10841:SF17)	membrane trafficking regulatory protein(PC00151);non-motor actin binding protein(PC00165)	Caenorhabditis elegans
CAEEL|WormBase=WBGene00001007|UniProtKB=G5ED34	178260	Dynein Light Intermediate chain;dli-1;ortholog	DYNEIN LIGHT INTERMEDIATE CHAIN, ISOFORM A (PTHR12688:SF0)	enzyme modulator(PC00095);microtubule family cytoskeletal protein(PC00157)	Caenorhabditis elegans
CAEEL|WormBase=WBGene00019828|UniProtKB=Q21641	187525	Uncharacterized protein;CELE_R02E12.4;ortholog	MAFF-INTERACTING PROTEIN-RELATED (PTHR19960:SF12)	non-motor microtubule binding protein(PC00166)	Caenorhabditis elegans
CAEEL|WormBase=WBGene00006826|UniProtKB=P50464	180827	LIM domain-containing protein unc-97;unc-97;ortholog	LIM DOMAIN-CONTAINING PROTEIN (PTHR24210:SF0)	actin family cytoskeletal protein(PC00041);structural protein(PC00211)	Caenorhabditis elegans
CAEEL|WormBase=WBGene00000066|UniProtKB=P10986	180767	Actin-4;act-4;ortholog	ACTIN-1-RELATED (PTHR11937:SF242)	actin and actin related protein(PC00039)	Caenorhabditis elegans
CAEEL|WormBase=WBGene00014232|UniProtKB=Q09647	176427	Tubulin polyglutamylase ttll-4;ttll-4;ortholog	TUBULIN POLYGLUTAMYLASE TTLL4 (PTHR12241:SF145)	ligase(PC00142);microtubule family cytoskeletal protein(PC00157)	Caenorhabditis elegans
CAEEL|WormBase=WBGene00006823|UniProtKB=O01479	172275	Tropomodulin;unc-94;ortholog	TROPOMODULIN, ISOFORM N (PTHR10901:SF6)	actin family cytoskeletal protein(PC00041)	Caenorhabditis elegans
CAEEL|WormBase=WBGene00010685|UniProtKB=O17939	180022	AIP1 (Actin Interacting Protein 1) Like;aipl-1;ortholog	WD REPEAT-CONTAINING PROTEIN 1 (PTHR19856:SF0)	non-motor actin binding protein(PC00165)	Caenorhabditis elegans
CAEEL|WormBase=WBGene00008666|UniProtKB=G5EE23	172870	Uncharacterized protein;CELE_F10G8.8;ortholog	PROTEIN OUTSPREAD (PTHR17271:SF1)	G-protein modulator(PC00022);actin family cytoskeletal protein(PC00041)	Caenorhabditis elegans
CAEEL|WormBase=WBGene00006840|UniProtKB=P34540	176179	Kinesin heavy chain;unc-116;ortholog	KINESIN HEAVY CHAIN ISOFORM 5A (PTHR24115:SF9)	microtubule binding motor protein(PC00156)	Caenorhabditis elegans
CAEEL|WormBase=WBGene00000248|UniProtKB=Q18817	175461	Tubulin beta chain;ben-1;ortholog	TUBULIN BETA CHAIN (PTHR11588:SF357)	tubulin(PC00228)	Caenorhabditis elegans
CAEEL|WormBase=WBGene00006536|UniProtKB=O17921	176501	Tubulin beta chain;tbb-1;ortholog	TUBULIN BETA-1 CHAIN-RELATED (PTHR11588:SF9)	tubulin(PC00228)	Caenorhabditis elegans
CAEEL|WormBase=WBGene00021192|UniProtKB=Q9TYP8	173735	Uncharacterized protein;CELE_Y14H12B.2;ortholog	SET (TRITHORAX/POLYCOMB) DOMAIN CONTAINING (PTHR23362:SF0)	actin family cytoskeletal protein(PC00041)	Caenorhabditis elegans
CAEEL|WormBase=WBGene00000292|UniProtKB=P34685	177497	F-actin-capping protein subunit alpha;cap-1;ortholog	F-ACTIN-CAPPING PROTEIN SUBUNIT ALPHA (PTHR10653:SF0)	non-motor actin binding protein(PC00165)	Caenorhabditis elegans

## Sheet: Receptor
CAEEL|WormBase=WBGene00007261|UniProtKB=Q93177	181643	ELRR (Extracellular Leucine-Rich Repeat) ONly;lron-3;ortholog	ELRR (EXTRACELLULAR LEUCINE-RICH REPEAT) ONLY (PTHR24364:SF23)	extracellular matrix protein(PC00102);receptor(PC00197)	Caenorhabditis elegans
CAEEL|WormBase=WBGene00001082|UniProtKB=P35603	180713	AP-2 complex subunit mu;dpy-23;ortholog	AP-2 COMPLEX SUBUNIT MU (PTHR10529:SF236)	extracellular matrix glycoprotein(PC00100);receptor(PC00197)	Caenorhabditis elegans
CAEEL|WormBase=WBGene00008885|UniProtKB=Q9XVQ0	184568	Uncharacterized protein;CELE_F16C3.1;ortholog	ALLATOSTATIN A RECEPTOR 1, ISOFORM B (PTHR24229:SF87)	G-protein coupled receptor(PC00021)	Caenorhabditis elegans
CAEEL|WormBase=WBGene00043156|UniProtKB=Q95QU1	175673	Uncharacterized protein;C27F2.9;ortholog	JMJC DOMAIN-CONTAINING PROTEIN 8 (PTHR12480:SF35)	receptor(PC00197)	Caenorhabditis elegans
CAEEL|WormBase=WBGene00001331|UniProtKB=P48583	181228	ER lumen protein-retaining receptor;erd-2;ortholog	ER LUMEN PROTEIN-RETAINING RECEPTOR (PTHR10585:SF53)	membrane trafficking regulatory protein(PC00151);receptor(PC00197)	Caenorhabditis elegans
CAEEL|WormBase=WBGene00006790|UniProtKB=G5ECR9	192082	UNC-55a isoform;unc-55;ortholog	UNC-55A ISOFORM (PTHR24082:SF287)	C4 zinc finger nuclear receptor(PC00169);nucleic acid binding(PC00171);receptor(PC00197)	Caenorhabditis elegans
CAEEL|WormBase=WBGene00008808|UniProtKB=O62169	184471	Nematocin receptor 2;ntr-2;ortholog	NEMATOCIN RECEPTOR 2 (PTHR24224:SF32)	G-protein coupled receptor(PC00021)	Caenorhabditis elegans
CAEEL|WormBase=WBGene00021528|UniProtKB=H2L0Q3	189837	Gamma-aminobutyric acid type B receptor subunit 1;gbb-1;ortholog	GAMMA-AMINOBUTYRIC ACID TYPE B RECEPTOR SUBUNIT 1 (PTHR10519:SF42)	G-protein coupled receptor(PC00021)	Caenorhabditis elegans
CAEEL|WormBase=WBGene00006287|UniProtKB=Q9XUJ6	189315	Seven TM Receptor;str-261;ortholog	SEVEN TM RECEPTOR (PTHR22943:SF6)	G-protein coupled receptor(PC00021)	Caenorhabditis elegans
CAEEL|WormBase=WBGene00020424|UniProtKB=O76412	188401	Uncharacterized protein;CELE_T10H9.1;ortholog	SUBFAMILY NOT NAMED (PTHR46955:SF1)	receptor(PC00197)	Caenorhabditis elegans
CAEEL|WormBase=WBGene00006153|UniProtKB=O18083	188391	Seven TM Receptor;str-96;ortholog	SEVEN TM RECEPTOR (PTHR22943:SF137)	G-protein coupled receptor(PC00021)	Caenorhabditis elegans
CAEEL|WormBase=WBGene00007944|UniProtKB=G5EF49	181313	Uncharacterized protein;C34F6.10;ortholog	SUBFAMILY NOT NAMED (PTHR24020:SF46)	receptor(PC00197)	Caenorhabditis elegans
CAEEL|WormBase=WBGene00000897|UniProtKB=P20792	176829	Cell surface receptor daf-1;daf-1;ortholog	CELL SURFACE RECEPTOR DAF-1 (PTHR23255:SF95)	TGF-beta receptor(PC00035);serine/threonine protein kinase receptor(PC00205)	Caenorhabditis elegans
CAEEL|WormBase=WBGene00016610|UniProtKB=Q94177	177416	Progestin and adipoQ receptor-like protein 1;paqr-1;ortholog	ADIPONECTIN RECEPTOR PROTEIN (PTHR20855:SF52)	receptor(PC00197)	Caenorhabditis elegans
CAEEL|WormBase=WBGene00003173|UniProtKB=Q18761	179382	Uncharacterized protein;mec-9;ortholog	SUBFAMILY NOT NAMED (PTHR24039:SF38)	annexin(PC00050);calmodulin(PC00061);cell adhesion molecule(PC00069);extracellular matrix glycoprotein(PC00100);extracellular matrix structural protein(PC00103);receptor(PC00197);signaling molecule(PC00207)	Caenorhabditis elegans
CAEEL|WormBase=WBGene00003600|UniProtKB=Q21878	181783	Nuclear hormone receptor family member nhr-1;nhr-1;ortholog	NUCLEAR HORMONE RECEPTOR FAMILY MEMBER NHR-1 (PTHR24083:SF159)	C4 zinc finger nuclear receptor(PC00169);nucleic acid binding(PC00171);receptor(PC00197)	Caenorhabditis elegans
CAEEL|WormBase=WBGene00003639|UniProtKB=O45666	172839	Nuclear hormone receptor family member nhr-49;nhr-49;ortholog	NUCLEAR HORMONE RECEPTOR FAMILY MEMBER NHR-49 (PTHR24083:SF93)	C4 zinc finger nuclear receptor(PC00169);nucleic acid binding(PC00171);receptor(PC00197)	Caenorhabditis elegans
CAEEL|WormBase=WBGene00018304|UniProtKB=G5EG68	3565243	AGRin (Synaptic protein) homolog;agr-1;ortholog	AGRIN (SYNAPTIC PROTEIN) HOMOLOG (PTHR10574:SF385)	extracellular matrix linker protein(PC00101);protease inhibitor(PC00191);receptor(PC00197)	Caenorhabditis elegans
CAEEL|WormBase=WBGene00001518|UniProtKB=Q09388	175893	Muscarinic acetylcholine receptor gar-2;gar-2;ortholog	MUSCARINIC ACETYLCHOLINE RECEPTOR, B-TYPE, ISOFORM A (PTHR24247:SF191)	G-protein coupled receptor(PC00021)	Caenorhabditis elegans
CAEEL|WormBase=WBGene00021328|UniProtKB=Q9N452	189587	NeuroPeptide Receptor family;npr-23;ortholog	GONADOTROPIN-RELEASING HORMONE RECEPTOR (GNRHR) RELATED-RELATED (PTHR24230:SF49)	G-protein coupled receptor(PC00021)	Caenorhabditis elegans
CAEEL|EnsemblGenome=WBGene00000478|UniProtKB=G5ECQ2	178768	Frizzled-2;cfz-2;ortholog	FRIZZLED-2 (PTHR11309:SF126)	G-protein coupled receptor(PC00021);protease inhibitor(PC00191);signaling molecule(PC00207)	Caenorhabditis elegans
CAEEL|WormBase=WBGene00022418|UniProtKB=Q95XJ7	180518	ImmunoGlobulin-like Cell adhesion Molecule family;igcm-4;ortholog	FIBROBLAST GROWTH FACTOR RECEPTOR-LIKE 1 (PTHR19890:SF10)	tyrosine protein kinase receptor(PC00233)	Caenorhabditis elegans
CAEEL|WormBase=WBGene00004215|UniProtKB=Q9BMN8	174685	Tyrosine-protein phosphatase Lar-like;ptp-3;ortholog	FI18312P1-RELATED (PTHR19134:SF474)	protein phosphatase(PC00195);receptor(PC00197)	Caenorhabditis elegans
CAEEL|WormBase=WBGene00021439|UniProtKB=G4SNP8	175341	CholecystoKinin Receptor homolog;ckr-2;ortholog	CHOLECYSTOKININ RECEPTOR HOMOLOG (PTHR24238:SF22)	G-protein coupled receptor(PC00021)	Caenorhabditis elegans
CAEEL|WormBase=WBGene00011382|UniProtKB=O45732	179571	DOPamine receptor;dop-5;ortholog	DOPAMINE RECEPTOR (PTHR24247:SF186)	G-protein coupled receptor(PC00021)	Caenorhabditis elegans
CAEEL|WormBase=WBGene00006777|UniProtKB=P90761	179387	Putative stoned B-like protein;unc-41;ortholog	STONIN 2 (PTHR10529:SF344)	extracellular matrix glycoprotein(PC00100);receptor(PC00197)	Caenorhabditis elegans
CAEEL|WormBase=WBGene00022734|UniProtKB=Q23483	175987	Uncharacterized protein;CELE_ZK418.5;ortholog	TRANSMEMBRANE PROTEIN 147 (PTHR12869:SF0)	receptor(PC00197)	Caenorhabditis elegans
CAEEL|WormBase=WBGene00005147|UniProtKB=Q9XV08	185988	Serpentine Receptor, class D (Delta);srd-70;ortholog	SERPENTINE RECEPTOR, CLASS D (DELTA)-RELATED (PTHR22945:SF83)	G-protein coupled receptor(PC00021)	Caenorhabditis elegans
CAEEL|WormBase=WBGene00010375|UniProtKB=H9G358	186709	Uncharacterized protein;CELE_H09F14.1;ortholog	SUBFAMILY NOT NAMED (PTHR24229:SF93)	G-protein coupled receptor(PC00021)	Caenorhabditis elegans
CAEEL|WormBase=WBGene00021313|UniProtKB=Q9N536	175739	Progestin and AdipoQ Receptor family;paqr-2;ortholog	PROGESTIN AND ADIPOQ RECEPTOR FAMILY (PTHR20855:SF28)	receptor(PC00197)	Caenorhabditis elegans
CAEEL|WormBase=WBGene00000164|UniProtKB=Q20736	186194	AdaPtin, Mu/medium chain (Clathrin associated complex);apm-3;ortholog	CARMINE, ISOFORM A (PTHR10529:SF340)	extracellular matrix glycoprotein(PC00100);receptor(PC00197)	Caenorhabditis elegans
CAEEL|WormBase=WBGene00003006|UniProtKB=G5EDV1	171832	Transmembrane receptor LIN-17;lin-17;ortholog	FRIZZLED-4 (PTHR11309:SF23)	G-protein coupled receptor(PC00021);protease inhibitor(PC00191);signaling molecule(PC00207)	Caenorhabditis elegans
CAEEL|WormBase=WBGene00022452|UniProtKB=Q9N488	173639	Receptor expression-enhancing protein;CELE_Y110A2AR.1;ortholog	RECEPTOR EXPRESSION-ENHANCING PROTEIN (PTHR12300:SF104)	receptor(PC00197);transporter(PC00227)	Caenorhabditis elegans
CAEEL|WormBase=WBGene00006843|UniProtKB=Q10658	176519	Protein unc-119;unc-119;ortholog	PROTEIN UNC-119 HOMOLOG (PTHR12951:SF1)	receptor(PC00197)	Caenorhabditis elegans
CAEEL|WormBase=WBGene00000900|UniProtKB=P50488	175781	Cell surface receptor daf-4;daf-4;ortholog	SERINE/THREONINE-PROTEIN KINASE RECEPTOR (PTHR23255:SF98)	TGF-beta receptor(PC00035);serine/threonine protein kinase receptor(PC00205)	Caenorhabditis elegans
CAEEL|WormBase=WBGene00015801|UniProtKB=Q18024	180881	Uncharacterized protein;C15H9.5;ortholog	RE59932P (PTHR21229:SF2)	G-protein coupled receptor(PC00021)	Caenorhabditis elegans
CAEEL|WormBase=WBGene00004220|UniProtKB=P91184	181764	PaTched Related family;ptr-5;ortholog	PATCHED RELATED FAMILY (PTHR10796:SF90)	receptor(PC00197)	Caenorhabditis elegans
CAEEL|WormBase=WBGene00017158|UniProtKB=H2KZ29	175829	Uncharacterized protein;hpo-10;ortholog	LEUKOCYTE RECEPTOR CLUSTER MEMBER 8 (PTHR12436:SF4)	ATP synthase(PC00002);hydrolase(PC00121);receptor(PC00197)	Caenorhabditis elegans
CAEEL|WormBase=WBGene00011401|UniProtKB=Q8WQD3	176759	Receptor expression-enhancing protein;CELE_T03F6.6;ortholog	RECEPTOR EXPRESSION-ENHANCING PROTEIN (PTHR12300:SF127)	receptor(PC00197);transporter(PC00227)	Caenorhabditis elegans
CAEEL|WormBase=WBGene00016044|UniProtKB=Q18130	179301	Uncharacterized protein;C24B5.1;ortholog	G-PROTEIN COUPLED RECEPTOR 19-RELATED (PTHR24243:SF214)	G-protein coupled receptor(PC00021)	Caenorhabditis elegans
CAEEL|WormBase=WBGene00015497|UniProtKB=Q65CM0	182276	Nuclear Hormone Receptor family;nhr-76;ortholog	TRANSCRIPTION FACTOR HNF-4 HOMOLOG (PTHR24083:SF104)	C4 zinc finger nuclear receptor(PC00169);nucleic acid binding(PC00171);receptor(PC00197)	Caenorhabditis elegans
CAEEL|WormBase=WBGene00006252|UniProtKB=Q966B3	192032	Seven TM Receptor;str-221;ortholog	SEVEN TM RECEPTOR (PTHR22943:SF34)	G-protein coupled receptor(PC00021)	Caenorhabditis elegans
CAEEL|WormBase=WBGene00013143|UniProtKB=O18215	190203	Uncharacterized protein;CELE_Y53C12B.1;ortholog	TRANSDUCIN BETA-LIKE PROTEIN 3 (PTHR19854:SF15)	G-protein coupled receptor(PC00021)	Caenorhabditis elegans
CAEEL|WormBase=WBGene00003609|UniProtKB=P41999	175993	Nuclear hormone receptor family member nhr-10;nhr-10;ortholog	NUCLEAR HORMONE RECEPTOR FAMILY MEMBER NHR-10 (PTHR24083:SF156)	C4 zinc finger nuclear receptor(PC00169);nucleic acid binding(PC00171);receptor(PC00197)	Caenorhabditis elegans
CAEEL|WormBase=WBGene00018798|UniProtKB=O44731	186230	GoNadotropin-Releasing hormone Receptor (GnRHR) related;gnrr-1;ortholog	ADIPOKINETIC HORMONE RECEPTOR, ISOFORM C (PTHR24241:SF163)	G-protein coupled receptor(PC00021)	Caenorhabditis elegans
CAEEL|WormBase=WBGene00000908|UniProtKB=G5EFF5	181263	Nuclear hormone receptor family member daf-12;daf-12;ortholog	NUCLEAR HORMONE RECEPTOR FAMILY MEMBER DAF-12 (PTHR24082:SF487)	C4 zinc finger nuclear receptor(PC00169);nucleic acid binding(PC00171);receptor(PC00197)	Caenorhabditis elegans
CAEEL|WormBase=WBGene00011563|UniProtKB=Q14V35	259530	JuMonJi (Transcription factor) Domain protein;jmjd-4;ortholog	JMJC DOMAIN-CONTAINING PROTEIN 4 (PTHR12480:SF6)	receptor(PC00197)	Caenorhabditis elegans
CAEEL|WormBase=WBGene00021353|UniProtKB=X5LX93	171771	IG(Immunoglobulin) and LRR(Leucine Rich Repeat) domains;iglr-3;ortholog	IG(IMMUNOGLOBULIN) AND LRR(LEUCINE RICH REPEAT) DOMAINS (PTHR24364:SF24)	extracellular matrix protein(PC00102);receptor(PC00197)	Caenorhabditis elegans
CAEEL|WormBase=WBGene00004238|UniProtKB=B6VQ56	181456	PaTched Related family;ptr-24;ortholog	PATCHED RELATED FAMILY (PTHR10796:SF189)	receptor(PC00197)	Caenorhabditis elegans
CAEEL|WormBase=WBGene00003238|UniProtKB=Q9N532	171677	Uncharacterized protein;mig-1;ortholog	SUBFAMILY NOT NAMED (PTHR11309:SF132)	G-protein coupled receptor(PC00021);protease inhibitor(PC00191);signaling molecule(PC00207)	Caenorhabditis elegans
CAEEL|WormBase=WBGene00003638|UniProtKB=Q94407	181661	Nuclear hormone receptor family member nhr-48;nhr-48;ortholog	NUCLEAR HORMONE RECEPTOR HR96 (PTHR24082:SF283)	C4 zinc finger nuclear receptor(PC00169);nucleic acid binding(PC00171);receptor(PC00197)	Caenorhabditis elegans
CAEEL|WormBase=WBGene00013039|UniProtKB=Q9XTT3	176673	SCAVenger receptor (CD36 family) related;scav-3;ortholog	SCAVENGER RECEPTOR (CD36 FAMILY) RELATED (PTHR11923:SF99)	receptor(PC00197)	Caenorhabditis elegans
CAEEL|EnsemblGenome=WBGene00001475|UniProtKB=G5EDK5	179788	FlaMIngo (Cadherin plus 7TM domain) homolog;fmi-1;ortholog	PROTOCADHERIN-LIKE WING POLARITY PROTEIN STAN (PTHR24026:SF51)	G-protein coupled receptor(PC00021);cadherin(PC00057)	Caenorhabditis elegans
CAEEL|WormBase=WBGene00003637|UniProtKB=Q17370	178933	Nuclear hormone receptor family member nhr-47;nhr-47;ortholog	NUCLEAR HORMONE RECEPTOR FAMILY MEMBER NHR-47 (PTHR24083:SF160)	C4 zinc finger nuclear receptor(PC00169);nucleic acid binding(PC00171);receptor(PC00197)	Caenorhabditis elegans
CAEEL|WormBase=WBGene00007126|UniProtKB=G5ED82	181886	DeHydroCholesterol Reductase;dhcr-7;ortholog	7-DEHYDROCHOLESTEROL REDUCTASE (PTHR21257:SF38)	receptor(PC00197);reductase(PC00198)	Caenorhabditis elegans
CAEEL|WormBase=WBGene00006787|UniProtKB=Q06561	175126	Basement membrane proteoglycan;unc-52;ortholog	BASEMENT MEMBRANE-SPECIFIC HEPARAN SULFATE PROTEOGLYCAN CORE PROTEIN (PTHR10574:SF273)	extracellular matrix linker protein(PC00101);protease inhibitor(PC00191);receptor(PC00197)	Caenorhabditis elegans
CAEEL|WormBase=WBGene00006890|UniProtKB=Q7YZW5	181066	Protein vem-1;vem-1;ortholog	CALCUTTA CUP-RELATED (PTHR10281:SF71)	receptor(PC00197);signaling molecule(PC00207)	Caenorhabditis elegans
CAEEL|WormBase=WBGene00003630|UniProtKB=Q22127	180560	Nuclear hormone receptor family member nhr-40;nhr-40;ortholog	NUCLEAR HORMONE RECEPTOR FAMILY MEMBER NHR-40 (PTHR24083:SF157)	C4 zinc finger nuclear receptor(PC00169);nucleic acid binding(PC00171);receptor(PC00197)	Caenorhabditis elegans
CAEEL|WormBase=WBGene00021897|UniProtKB=Q8MXS7	259560	SERotonin/octopamine receptor family;ser-6;ortholog	SEROTONIN/OCTOPAMINE RECEPTOR FAMILY (PTHR24247:SF92)	G-protein coupled receptor(PC00021)	Caenorhabditis elegans

## Sheet: Membrane traffic protein
CAEEL|WormBase=WBGene00008438|UniProtKB=G5EDP5	3565199	Uncharacterized protein;CELE_DH11.5;ortholog	SUBFAMILY NOT NAMED (PTHR10024:SF355)	membrane trafficking regulatory protein(PC00151)	Caenorhabditis elegans
CAEEL|WormBase=WBGene00004364|UniProtKB=A5PEW5	179427	Synaptosomal-associated protein;ric-4;ortholog	SYNAPTOSOMAL-ASSOCIATED PROTEIN-RELATED (PTHR19305:SF14)	SNARE protein(PC00034)	Caenorhabditis elegans
CAEEL|WormBase=WBGene00012345|UniProtKB=P91915	189290	Uncharacterized protein;CELE_W08E3.4;ortholog	SUBFAMILY NOT NAMED (PTHR10809:SF67)	membrane trafficking regulatory protein(PC00151)	Caenorhabditis elegans
CAEEL|WormBase=WBGene00007128|UniProtKB=P41941	181891	Golgi SNAP receptor complex member 2 homolog memb-1;memb-1;ortholog	GOLGI SNAP RECEPTOR COMPLEX MEMBER 2 (PTHR21230:SF1)	SNARE protein(PC00034)	Caenorhabditis elegans
CAEEL|WormBase=WBGene00001331|UniProtKB=P48583	181228	ER lumen protein-retaining receptor;erd-2;ortholog	ER LUMEN PROTEIN-RETAINING RECEPTOR (PTHR10585:SF53)	membrane trafficking regulatory protein(PC00151);receptor(PC00197)	Caenorhabditis elegans
CAEEL|WormBase=WBGene00011775|UniProtKB=Q22498	177891	Probable coatomer subunit gamma;T14G10.5;ortholog	COATOMER SUBUNIT GAMMA-2 (PTHR10261:SF0)	vesicle coat protein(PC00235)	Caenorhabditis elegans
CAEEL|WormBase=Y116A8C.36d|UniProtKB=A0A0K3AS36	178491	ITSN (Intersectin) family;itsn-1;ortholog	DYNAMIN ASSOCIATED PROTEIN 160, ISOFORM D (PTHR11216:SF136)	G-protein modulator(PC00022);calcium-binding protein(PC00060);membrane traffic protein(PC00150)	Caenorhabditis elegans
CAEEL|WormBase=WBGene00007586|UniProtKB=Q17973	179725	RNAi-Induced Longevity;ril-2;ortholog	RNAI-INDUCED LONGEVITY (PTHR10981:SF3)	membrane trafficking regulatory protein(PC00151)	Caenorhabditis elegans
CAEEL|WormBase=WBGene00004753|UniProtKB=Q9XWS2	172924	Exocyst complex component 4;sec-8;ortholog	EXOCYST COMPLEX COMPONENT 4 (PTHR14146:SF0)	membrane traffic protein(PC00150)	Caenorhabditis elegans
CAEEL|WormBase=WBGene00003804|UniProtKB=O45933	176748	Nucleoporin SEH1;npp-18;ortholog	NUCLEOPORIN SEH1 (PTHR11024:SF3)	membrane trafficking regulatory protein(PC00151)	Caenorhabditis elegans
CAEEL|WormBase=WBGene00006751|UniProtKB=Q9XZI6	171952	Phosphatidylinositol-binding clathrin assembly protein unc-11;unc-11;ortholog	PHOSPHATIDYLINOSITOL-BINDING CLATHRIN ASSEMBLY PROTEIN LAP (PTHR22951:SF5)	vesicle coat protein(PC00235)	Caenorhabditis elegans
CAEEL|WormBase=WBGene00018468|UniProtKB=W6RTA4	177539	CLArinet, functional homolog of cytomatrix at the active zone proteins piccolo and fife;cla-1;ortholog	SYNAPTOTAGMIN-17 (PTHR10024:SF348)	membrane trafficking regulatory protein(PC00151)	Caenorhabditis elegans
CAEEL|WormBase=WBGene00000157|UniProtKB=Q19123	184091	AP complex subunit sigma;aps-2;ortholog	AP-2 COMPLEX SUBUNIT SIGMA (PTHR11753:SF6)	vesicle coat protein(PC00235)	Caenorhabditis elegans
CAEEL|WormBase=WBGene00017016|UniProtKB=Q18921	179193	SNAP (Soluble NSF Attachment Protein) homolog;snap-1;ortholog	ALPHA-SOLUBLE NSF ATTACHMENT PROTEIN (PTHR13768:SF8)	membrane traffic protein(PC00150)	Caenorhabditis elegans
CAEEL|WormBase=WBGene00006933|UniProtKB=Q21053	174000	Vacuolar protein sorting-associated protein 35;vps-35;ortholog	VACUOLAR PROTEIN SORTING-ASSOCIATED PROTEIN 35 (PTHR11099:SF0)	membrane traffic protein(PC00150)	Caenorhabditis elegans
CAEEL|WormBase=WBGene00015734|UniProtKB=Q09236	175940	Probable coatomer subunit delta;copd-1;ortholog	COATOMER SUBUNIT DELTA (PTHR10121:SF0)	vesicle coat protein(PC00235)	Caenorhabditis elegans
CAEEL|WormBase=WBGene00019747|UniProtKB=G5EEM9	173795	Intracelllar PhosphoLipase A family;ipla-1;ortholog	INTRACELLLAR PHOSPHOLIPASE A FAMILY (PTHR23509:SF27)	membrane traffic protein(PC00150);phospholipase(PC00186)	Caenorhabditis elegans
CAEEL|WormBase=WBGene00010713|UniProtKB=G5EGG0	178311	USO1 (Yeast transport protein) homolog;uso-1;ortholog	GENERAL VESICULAR TRANSPORT FACTOR P115 (PTHR10013:SF0)	membrane traffic protein(PC00150)	Caenorhabditis elegans
CAEEL|WormBase=WBGene00006798|UniProtKB=O16000	176743	Syntaxin-1A homolog;unc-64;ortholog	SYNTAXIN-1A HOMOLOG (PTHR19957:SF231)	SNARE protein(PC00034)	Caenorhabditis elegans
CAEEL|WormBase=WBGene00022122|UniProtKB=Q95XT5	171865	TRanslocon-Associated Protein;trap-1;ortholog	TRANSLOCON-ASSOCIATED PROTEIN SUBUNIT ALPHA (PTHR12924:SF0)	calcium-binding protein(PC00060);membrane traffic protein(PC00150)	Caenorhabditis elegans
CAEEL|WormBase=WBGene00011696|UniProtKB=G5ED80	179832	EEA1;eea-1;ortholog	EARLY ENDOSOME ANTIGEN 1 (PTHR23164:SF17)	membrane trafficking regulatory protein(PC00151)	Caenorhabditis elegans
CAEEL|WormBase=WBGene00018987|UniProtKB=G5EEI1	180435	LGL-1;lgl-1;ortholog	LETHAL(2) GIANT LARVAE PROTEIN (PTHR10241:SF29)	membrane trafficking regulatory protein(PC00151)	Caenorhabditis elegans
CAEEL|WormBase=WBGene00020838|UniProtKB=P91503	172297	TRAK1 and TRAK2 related;trak-1;ortholog	TRAFFICKING KINESIN-BINDING PROTEIN MILT (PTHR15751:SF12)	membrane traffic protein(PC00150)	Caenorhabditis elegans
CAEEL|WormBase=WBGene00006306|UniProtKB=Q19136	184108	SUppressor of Elongation defect;sue-1;ortholog	SYNAPTOTAGMIN-12 (PTHR10024:SF252)	membrane trafficking regulatory protein(PC00151)	Caenorhabditis elegans
CAEEL|WormBase=WBGene00003806|UniProtKB=Q9N4A7	176957	Protein SEC13 homolog;npp-20;ortholog	PROTEIN SEC13 HOMOLOG (PTHR11024:SF2)	membrane trafficking regulatory protein(PC00151)	Caenorhabditis elegans
CAEEL|WormBase=WBGene00012696|UniProtKB=Q8MYM6	180241	REPS (RalBP1-associated Eps domain-containing protein) homolog;reps-1;ortholog	GH06923P (PTHR11216:SF61)	G-protein modulator(PC00022);calcium-binding protein(PC00060);membrane traffic protein(PC00150)	Caenorhabditis elegans
CAEEL|WormBase=WBGene00003053|UniProtKB=Q11117	180912	LAMP family protein lmp-1;lmp-1;ortholog	LAMP FAMILY PROTEIN LMP-1 (PTHR11506:SF33)	membrane trafficking regulatory protein(PC00151)	Caenorhabditis elegans
CAEEL|WormBase=WBGene00004921|UniProtKB=P34693	174120	Synaptotagmin-1;snt-1;ortholog	SYNAPTOTAGMIN 1 (PTHR10024:SF227)	membrane trafficking regulatory protein(PC00151)	Caenorhabditis elegans
CAEEL|WormBase=WBGene00002999|UniProtKB=O17583	172597	Protein lin-10;lin-10;ortholog	X11L, ISOFORM F-RELATED (PTHR12345:SF16)	membrane trafficking regulatory protein(PC00151)	Caenorhabditis elegans
CAEEL|WormBase=WBGene00004922|UniProtKB=K8FE10	185680	Synaptotagmin 2;snt-2;ortholog	SYNAPTOTAGMIN 2 (PTHR10024:SF352)	membrane trafficking regulatory protein(PC00151)	Caenorhabditis elegans
CAEEL|WormBase=WBGene00007059|UniProtKB=G5EFV8	181018	Vacuolar protein sorting-associated protein 52 homolog;vps-52;ortholog	VACUOLAR PROTEIN SORTING-ASSOCIATED PROTEIN 52 HOMOLOG (PTHR14190:SF7)	membrane traffic protein(PC00150)	Caenorhabditis elegans
CAEEL|WormBase=WBGene00008183|UniProtKB=G5ECF0	3565509	RIN (Ras/Rab INteractor) homolog;rin-1;ortholog	PROTEIN SPRINT (PTHR23101:SF104)	guanyl-nucleotide exchange factor(PC00113);membrane trafficking regulatory protein(PC00151)	Caenorhabditis elegans
CAEEL|WormBase=WBGene00019757|UniProtKB=Q21499	187425	Golgi SNAP receptor complex member 2;memb-2;ortholog	GOLGI SNAP RECEPTOR COMPLEX MEMBER 2 (PTHR21230:SF25)	SNARE protein(PC00034)	Caenorhabditis elegans
CAEEL|WormBase=WBGene00011867|UniProtKB=P34574	176434	Probable clathrin heavy chain 1;chc-1;ortholog	CLATHRIN HEAVY CHAIN (PTHR10292:SF1)	vesicle coat protein(PC00235)	Caenorhabditis elegans
CAEEL|WormBase=WBGene00004912|UniProtKB=O76735	180995	Synaptogyrin homolog 1;sng-1;ortholog	SYNAPTOGYRIN (PTHR10838:SF20)	membrane trafficking regulatory protein(PC00151)	Caenorhabditis elegans
CAEEL|WormBase=WBGene00020861|UniProtKB=Q23056	188995	Uncharacterized protein;CELE_T27E4.1;ortholog	SUBFAMILY NOT NAMED (PTHR10024:SF354)	membrane trafficking regulatory protein(PC00151)	Caenorhabditis elegans
CAEEL|WormBase=WBGene00009654|UniProtKB=Q20364	185707	SLY1 homolog;sly-1;ortholog	SEC1 FAMILY DOMAIN-CONTAINING PROTEIN 1 (PTHR11679:SF2)	membrane trafficking regulatory protein(PC00151);transporter(PC00227)	Caenorhabditis elegans
CAEEL|WormBase=WBGene00012644|UniProtKB=Q8I100	176481	RAB eXchange factor;rabx-5;ortholog	RAB5 GDP/GTP EXCHANGE FACTOR (PTHR23101:SF25)	guanyl-nucleotide exchange factor(PC00113);membrane trafficking regulatory protein(PC00151)	Caenorhabditis elegans
CAEEL|WormBase=WBGene00022534|UniProtKB=Q9TY08	175712	SYntaXin;syx-16;ortholog	STX16-NPEPL1 READTHROUGH (NMD CANDIDATE)-RELATED (PTHR19957:SF83)	SNARE protein(PC00034)	Caenorhabditis elegans
CAEEL|WormBase=WBGene00006757|UniProtKB=P34815	181030	Putative acetylcholine regulator unc-18;unc-18;ortholog	PROTEIN ROP (PTHR11679:SF30)	membrane trafficking regulatory protein(PC00151);transporter(PC00227)	Caenorhabditis elegans
CAEEL|WormBase=WBGene00009829|UniProtKB=Q20546	179567	Uncharacterized protein;CELE_F47G9.1;ortholog	TMED10 PROTEIN (PTHR22811:SF58)	transfer/carrier protein(PC00219);vesicle coat protein(PC00235)	Caenorhabditis elegans
CAEEL|WormBase=WBGene00004913|UniProtKB=Q8MXU3	176987	SyNapsiN;snn-1;ortholog	SYNAPSIN (PTHR10841:SF17)	membrane trafficking regulatory protein(PC00151);non-motor actin binding protein(PC00165)	Caenorhabditis elegans
CAEEL|EnsemblGenome=WBGene00006594|UniProtKB=A0A0K3ATN9	172209	TOMosyn synaptic protein;tom-1;ortholog	TOMOSYN, ISOFORM C (PTHR10241:SF25)	membrane trafficking regulatory protein(PC00151)	Caenorhabditis elegans
CAEEL|WormBase=WBGene00000160|UniProtKB=Q9N4F3	175376	AP complex subunit beta;apb-1;ortholog	AP COMPLEX SUBUNIT BETA (PTHR11134:SF3)	membrane traffic protein(PC00150)	Caenorhabditis elegans
CAEEL|WormBase=WBGene00001224|UniProtKB=Q9BIF4	173985	EHS-1;ehs-1;ortholog	EPIDERMAL GROWTH FACTOR RECEPTOR PATHWAY SUBSTRATE CLONE 15, ISOFORM A (PTHR11216:SF126)	G-protein modulator(PC00022);calcium-binding protein(PC00060);membrane traffic protein(PC00150)	Caenorhabditis elegans
CAEEL|WormBase=WBGene00020246|UniProtKB=P90961	179150	Clathrin light chain;clic-1;ortholog	CLATHRIN LIGHT CHAIN (PTHR10639:SF7)	vesicle coat protein(PC00235)	Caenorhabditis elegans
CAEEL|WormBase=WBGene00002070|UniProtKB=G5EDE8	172799	ERGIC-53-like protein;ile-1;ortholog	LECTIN, MANNOSE BINDING 1 (PTHR12223:SF8)	membrane traffic protein(PC00150)	Caenorhabditis elegans
CAEEL|WormBase=WBGene00007743|UniProtKB=Q7YX71	259317	Uncharacterized protein;C26C6.9;ortholog	SUBFAMILY NOT NAMED (PTHR22811:SF77)	transfer/carrier protein(PC00219);vesicle coat protein(PC00235)	Caenorhabditis elegans
CAEEL|WormBase=WBGene00004927|UniProtKB=Q9GYJ9	180468	Sorting NeXin;snx-1;ortholog	FI18122P1 (PTHR10555:SF170)	membrane trafficking regulatory protein(PC00151)	Caenorhabditis elegans
CAEEL|WormBase=WBGene00015130|UniProtKB=P34260	176221	Vacuolar protein sorting-associated protein 33A;vps-33.1;ortholog	VACUOLAR PROTEIN SORTING-ASSOCIATED PROTEIN 33A (PTHR11679:SF56)	membrane trafficking regulatory protein(PC00151);transporter(PC00227)	Caenorhabditis elegans
CAEEL|WormBase=WBGene00004923|UniProtKB=Q965S5	190698	SyNapTotagmin;snt-3;ortholog	SYNAPTOTAGMIN (PTHR10024:SF221)	membrane trafficking regulatory protein(PC00151)	Caenorhabditis elegans
CAEEL|WormBase=WBGene00004925|UniProtKB=O16700	178631	SyNapTotagmin;snt-5;ortholog	SYNAPTOTAGMIN (PTHR10024:SF206)	membrane trafficking regulatory protein(PC00151)	Caenorhabditis elegans

## Sheet: Calcium-binding protein
CAEEL|WormBase=WBGene00019352|UniProtKB=H2L0D6	186916	Uncharacterized protein;CELE_K03A1.4;ortholog	CALMODULIN-LIKE PROTEIN (PTHR23050:SF233)	calmodulin(PC00061)	Caenorhabditis elegans
CAEEL|WormBase=WBGene00000288|UniProtKB=G5EDZ8	177945	CALmodulin related genes;cal-4;ortholog	CALMODULIN RELATED GENES (PTHR23050:SF130)	calmodulin(PC00061)	Caenorhabditis elegans
CAEEL|WormBase=WBGene00000545|UniProtKB=Q8IAA9	175326	CaLPain family;clp-4;ortholog	CALPAIN FAMILY (PTHR10183:SF262)	annexin(PC00050);calmodulin(PC00061);cysteine protease(PC00081)	Caenorhabditis elegans
CAEEL|WormBase=WBGene00011145|UniProtKB=P30644	187699	Uncharacterized calcium-binding protein R08D7.5;R08D7.5;ortholog	SUBFAMILY NOT NAMED (PTHR23050:SF340)	calmodulin(PC00061)	Caenorhabditis elegans
CAEEL|WormBase=WBGene00009054|UniProtKB=Q27494	184829	Serine/threonine-protein phosphatase;CELE_F22D6.9;ortholog	SERINE/THREONINE-PROTEIN PHOSPHATASE (PTHR11668:SF236)	calcium-binding protein(PC00060);protein phosphatase(PC00195)	Caenorhabditis elegans
CAEEL|WormBase=WBGene00001748|UniProtKB=P48727	3564807	Serine/threonine-protein phosphatase PP1-beta;gsp-2;ortholog	SERINE/THREONINE-PROTEIN PHOSPHATASE PP1-BETA (PTHR11668:SF434)	calcium-binding protein(PC00060);protein phosphatase(PC00195)	Caenorhabditis elegans
CAEEL|WormBase=WBGene00018657|UniProtKB=Q9N5S8	180519	ACyLtransferase-like;acl-4;ortholog	ACYLTRANSFERASE-LIKE (PTHR23063:SF8)	acyltransferase(PC00042);annexin(PC00050);calmodulin(PC00061)	Caenorhabditis elegans
CAEEL|WormBase=WBGene00001426|UniProtKB=Q20107	191634	Peptidylprolyl isomerase;fkb-1;ortholog	PEPTIDYLPROLYL ISOMERASE (PTHR10516:SF402)	calcium-binding protein(PC00060);chaperone(PC00072);isomerase(PC00135)	Caenorhabditis elegans
CAEEL|WormBase=Y116A8C.36d|UniProtKB=A0A0K3AS36	178491	ITSN (Intersectin) family;itsn-1;ortholog	DYNAMIN ASSOCIATED PROTEIN 160, ISOFORM D (PTHR11216:SF136)	G-protein modulator(PC00022);calcium-binding protein(PC00060);membrane traffic protein(PC00150)	Caenorhabditis elegans
CAEEL|WormBase=WBGene00003173|UniProtKB=Q18761	179382	Uncharacterized protein;mec-9;ortholog	SUBFAMILY NOT NAMED (PTHR24039:SF38)	annexin(PC00050);calmodulin(PC00061);cell adhesion molecule(PC00069);extracellular matrix glycoprotein(PC00100);extracellular matrix structural protein(PC00103);receptor(PC00197);signaling molecule(PC00207)	Caenorhabditis elegans
CAEEL|WormBase=WBGene00002192|UniProtKB=H9G328	178068	Protein KINase;kin-4;ortholog	DROP OUT, ISOFORM A (PTHR24356:SF356)	annexin(PC00050);calmodulin(PC00061);non-receptor serine/threonine protein kinase(PC00167);transfer/carrier protein(PC00219)	Caenorhabditis elegans
CAEEL|WormBase=WBGene00004083|UniProtKB=G5EC18	182242	Serine/threonine-protein phosphatase;pph-1;ortholog	SERINE/THREONINE-PROTEIN PHOSPHATASE (PTHR11668:SF300)	calcium-binding protein(PC00060);protein phosphatase(PC00195)	Caenorhabditis elegans
CAEEL|WormBase=WBGene00004727|UniProtKB=Q2L6W9	180655	Serine/threonine-protein kinase sax-1;sax-1;ortholog	SERINE/THREONINE-PROTEIN KINASE TRICORNER (PTHR24356:SF184)	annexin(PC00050);calmodulin(PC00061);non-receptor serine/threonine protein kinase(PC00167);transfer/carrier protein(PC00219)	Caenorhabditis elegans
CAEEL|WormBase=WBGene00000103|UniProtKB=Q9XTG7	181524	Serine/threonine-protein kinase akt-2;akt-2;ortholog	RAC SERINE/THREONINE-PROTEIN KINASE (PTHR24356:SF333)	annexin(PC00050);calmodulin(PC00061);non-receptor serine/threonine protein kinase(PC00167);transfer/carrier protein(PC00219)	Caenorhabditis elegans
CAEEL|WormBase=WBGene00016081|UniProtKB=Q4R171	178923	Serine/threonine-protein phosphatase;C25A6.1;ortholog	SERINE/THREONINE-PROTEIN PHOSPHATASE (PTHR11668:SF398)	calcium-binding protein(PC00060);protein phosphatase(PC00195)	Caenorhabditis elegans
CAEEL|WormBase=WBGene00009793|UniProtKB=G5EGE3	181244	Protein Kinase N (PKN) homolog;pkn-1;ortholog	SERINE/THREONINE-PROTEIN KINASE N (PTHR24356:SF210)	annexin(PC00050);calmodulin(PC00061);non-receptor serine/threonine protein kinase(PC00167);transfer/carrier protein(PC00219)	Caenorhabditis elegans
CAEEL|WormBase=WBGene00018376|UniProtKB=Q20358	180753	Uncharacterized protein;CELE_F43C9.2;ortholog	SUBFAMILY NOT NAMED (PTHR23050:SF331)	calmodulin(PC00061)	Caenorhabditis elegans
CAEEL|WormBase=Y37A1B.1a|UniProtKB=A0A0S4XR43	178362	CCAR1 homolog;ccar-1;ortholog	CCAR1 HOMOLOG (PTHR14304:SF11)	calmodulin(PC00061)	Caenorhabditis elegans
CAEEL|WormBase=WBGene00006861|UniProtKB=Q18136	192083	CALmodulin related genes;cal-5;ortholog	CALMODULIN RELATED GENES (PTHR23050:SF314)	calmodulin(PC00061)	Caenorhabditis elegans
CAEEL|WormBase=WBGene00009674|UniProtKB=Q8MQ51	181230	NUCleoBindin homolog;nucb-1;ortholog	NUCB1 (PTHR19237:SF20)	annexin(PC00050);calmodulin(PC00061);nucleic acid binding(PC00171)	Caenorhabditis elegans
CAEEL|WormBase=WBGene00000552|UniProtKB=O16305	178614	Calmodulin;cmd-1;ortholog	CALMODULIN (PTHR23050:SF401)	calmodulin(PC00061)	Caenorhabditis elegans
CAEEL|WormBase=WBGene00000286|UniProtKB=G5EEG0	182789	CALmodulin related genes;cal-2;ortholog	CALMODULIN RELATED GENES (PTHR23050:SF119)	calmodulin(PC00061)	Caenorhabditis elegans
CAEEL|WormBase=WBGene00008924|UniProtKB=Q19529	181399	Probable calcium-binding mitochondrial carrier F17E5.2;F17E5.2;ortholog	FI05451P (PTHR24089:SF57)	amino acid transporter(PC00046);calmodulin(PC00061);mitochondrial carrier protein(PC00158);transfer/carrier protein(PC00219)	Caenorhabditis elegans
CAEEL|WormBase=WBGene00022122|UniProtKB=Q95XT5	171865	TRanslocon-Associated Protein;trap-1;ortholog	TRANSLOCON-ASSOCIATED PROTEIN SUBUNIT ALPHA (PTHR12924:SF0)	calcium-binding protein(PC00060);membrane traffic protein(PC00150)	Caenorhabditis elegans
CAEEL|WormBase=WBGene00004036|UniProtKB=G5EFI8	181274	1-phosphatidylinositol 4,5-bisphosphate phosphodiesterase epsilon-1;plc-1;ortholog	1-PHOSPHATIDYLINOSITOL 4,5-BISPHOSPHATE PHOSPHODIESTERASE EPSILON-1 (PTHR10336:SF6)	calcium-binding protein(PC00060);guanyl-nucleotide exchange factor(PC00113);phospholipase(PC00186);signaling molecule(PC00207)	Caenorhabditis elegans
CAEEL|WormBase=WBGene00000547|UniProtKB=Q9N4B1	176953	CaLPain family;clp-7;ortholog	CALPAIN FAMILY (PTHR10183:SF392)	annexin(PC00050);calmodulin(PC00061);cysteine protease(PC00081)	Caenorhabditis elegans
CAEEL|WormBase=WBGene00006599|UniProtKB=P34722	176825	Protein kinase C-like 1;tpa-1;ortholog	PROTEIN KINASE C DELTA TYPE HOMOLOG-RELATED (PTHR24356:SF347)	annexin(PC00050);calmodulin(PC00061);non-receptor serine/threonine protein kinase(PC00167);transfer/carrier protein(PC00219)	Caenorhabditis elegans
CAEEL|WormBase=WBGene00004032|UniProtKB=P34885	179649	Protein kinase C-like 1B;pkc-1;ortholog	PROTEIN KINASE C (PTHR24356:SF240)	annexin(PC00050);calmodulin(PC00061);non-receptor serine/threonine protein kinase(PC00167);transfer/carrier protein(PC00219)	Caenorhabditis elegans
CAEEL|WormBase=WBGene00012696|UniProtKB=Q8MYM6	180241	REPS (RalBP1-associated Eps domain-containing protein) homolog;reps-1;ortholog	GH06923P (PTHR11216:SF61)	G-protein modulator(PC00022);calcium-binding protein(PC00060);membrane traffic protein(PC00150)	Caenorhabditis elegans
CAEEL|WormBase=WBGene00004033|UniProtKB=P90980	181166	Protein kinase C-like 2;pkc-2;ortholog	PROTEIN KINASE C, BRAIN ISOZYME-RELATED (PTHR24356:SF331)	annexin(PC00050);calmodulin(PC00061);non-receptor serine/threonine protein kinase(PC00167);transfer/carrier protein(PC00219)	Caenorhabditis elegans
CAEEL|WormBase=WBGene00019827|UniProtKB=Q21643	180685	MO25 (MOuse embryo scaffolding Protein) homolog;mop-25.1;ortholog	PROTEIN MO25 (PTHR10182:SF3)	annexin(PC00050)	Caenorhabditis elegans
CAEEL|WormBase=WBGene00004045|UniProtKB=Q8IA75	187273	Phosphoinositide phospholipase C;pll-1;ortholog	PHOSPHOINOSITIDE PHOSPHOLIPASE C (PTHR10336:SF36)	calcium-binding protein(PC00060);phospholipase(PC00186)	Caenorhabditis elegans
CAEEL|WormBase=R13A5.11b|UniProtKB=A0A0K3AU53	176075	Serine/threonine-protein phosphatase;CELE_R13A5.11;ortholog	SERINE/THREONINE-PROTEIN PHOSPHATASE (PTHR11668:SF10)	calcium-binding protein(PC00060);protein phosphatase(PC00195)	Caenorhabditis elegans
CAEEL|WormBase=WBGene00003965|UniProtKB=Q9Y1J3	180475	3-phosphoinositide-dependent protein kinase 1;pdk-1;ortholog	3-PHOSPHOINOSITIDE-DEPENDENT PROTEIN KINASE 1 (PTHR24356:SF309)	annexin(PC00050);calmodulin(PC00061);non-receptor serine/threonine protein kinase(PC00167);transfer/carrier protein(PC00219)	Caenorhabditis elegans
CAEEL|WormBase=WBGene00011538|UniProtKB=O45757	180039	Uncharacterized protein;CELE_T06E6.1;ortholog	WD REPEAT-CONTAINING PROTEIN 74 (PTHR16038:SF4)	annexin(PC00050);calmodulin(PC00061)	Caenorhabditis elegans
CAEEL|WormBase=WBGene00000542|UniProtKB=P34308	176122	Calpain clp-1;clp-1;ortholog	CALPAIN-A-RELATED (PTHR10183:SF396)	annexin(PC00050);calmodulin(PC00061);cysteine protease(PC00081)	Caenorhabditis elegans
CAEEL|WormBase=WBGene00001224|UniProtKB=Q9BIF4	173985	EHS-1;ehs-1;ortholog	EPIDERMAL GROWTH FACTOR RECEPTOR PATHWAY SUBSTRATE CLONE 15, ISOFORM A (PTHR11216:SF126)	G-protein modulator(PC00022);calcium-binding protein(PC00060);membrane traffic protein(PC00150)	Caenorhabditis elegans
CAEEL|WormBase=WBGene00001427|UniProtKB=Q9U2Q8	173160	Peptidylprolyl isomerase;fkb-2;ortholog	PEPTIDYL-PROLYL CIS-TRANS ISOMERASE FKBP1B (PTHR10516:SF341)	calcium-binding protein(PC00060);chaperone(PC00072);isomerase(PC00135)	Caenorhabditis elegans
CAEEL|WormBase=WBGene00017240|UniProtKB=Q9TYS8	184174	CALUmenin (Calcium-binding protein) homolog;calu-2;ortholog	RETICULOCALBIN-2 (PTHR10827:SF56)	calmodulin(PC00061)	Caenorhabditis elegans
CAEEL|WormBase=WBGene00015264|UniProtKB=Q11083	182041	Uncharacterized calcium-binding protein B0563.7;B0563.7;ortholog	SUBFAMILY NOT NAMED (PTHR23050:SF309)	calmodulin(PC00061)	Caenorhabditis elegans

## Sheet: Signaling molecule
CAEEL|WormBase=WBGene00000858|UniProtKB=P34889	177870	Protein Wnt-2;cwn-2;ortholog	PROTEIN WNT-5 (PTHR12027:SF77)	signaling molecule(PC00207)	Caenorhabditis elegans
CAEEL|WormBase=WBGene00003237|UniProtKB=Q9GUG4	190649	MIF (Macrophage migration Inhibitory Factor) related;mif-4;ortholog	MIF (MACROPHAGE MIGRATION INHIBITORY FACTOR) RELATED (PTHR11954:SF15)	cytokine(PC00083);isomerase(PC00135)	Caenorhabditis elegans
CAEEL|WormBase=WBGene00002176|UniProtKB=G4RZC8	173513	JNK Interacting Protein (Scaffold protein);jip-1;ortholog	JNK-INTERACTING PROTEIN 1 (PTHR11232:SF18)	kinase activator(PC00138);signaling molecule(PC00207)	Caenorhabditis elegans
CAEEL|WormBase=WBGene00012468|UniProtKB=Q9XXH7	174849	Uncharacterized protein;CELE_Y17G7B.17;ortholog	MYELOID LEUKEMIA FACTOR (PTHR13105:SF7)	signaling molecule(PC00207)	Caenorhabditis elegans
CAEEL|WormBase=WBGene00022454|UniProtKB=Q9N586	172151	Uncharacterized protein;CELE_Y110A7A.2;ortholog	TNF RECEPTOR-ASSOCIATED FACTOR 4 (PTHR10131:SF120)	signaling molecule(PC00207)	Caenorhabditis elegans
CAEEL|WormBase=WBGene00004896|UniProtKB=Q9N4U5	173693	Smu-2 suppressor of mec-8 and unc-52 protein;smu-2;ortholog	PROTEIN RED (PTHR12765:SF5)	cytokine(PC00083)	Caenorhabditis elegans
CAEEL|WormBase=WBGene00004890|UniProtKB=Q9TYS4	183905	SeMaPhorin related;smp-2;ortholog	SEMAPHORIN RELATED (PTHR11036:SF92)	membrane-bound signaling molecule(PC00152)	Caenorhabditis elegans
CAEEL|WormBase=WBGene00003241|UniProtKB=Q22227	174317	Segment polarity protein dishevelled homolog mig-5;mig-5;ortholog	SEGMENT POLARITY PROTEIN DISHEVELLED HOMOLOG MIG-5 (PTHR10878:SF24)	enzyme modulator(PC00095);signaling molecule(PC00207)	Caenorhabditis elegans
CAEEL|WormBase=WBGene00002267|UniProtKB=Q18625	175488	Galectin;lec-4;ortholog	GALECTIN (PTHR11346:SF147)	cell adhesion molecule(PC00069);signaling molecule(PC00207)	Caenorhabditis elegans
CAEEL|WormBase=WBGene00020722|UniProtKB=A7DT38	188778	Putative glycoprotein hormone-beta5;gpb5;ortholog	GLYCOPROTEIN HORMONE BETA 5, ISOFORM A (PTHR11515:SF13)	peptide hormone(PC00179)	Caenorhabditis elegans
CAEEL|WormBase=WBGene00003173|UniProtKB=Q18761	179382	Uncharacterized protein;mec-9;ortholog	SUBFAMILY NOT NAMED (PTHR24039:SF38)	annexin(PC00050);calmodulin(PC00061);cell adhesion molecule(PC00069);extracellular matrix glycoprotein(PC00100);extracellular matrix structural protein(PC00103);receptor(PC00197);signaling molecule(PC00207)	Caenorhabditis elegans
CAEEL|WormBase=WBGene00006805|UniProtKB=O61528	171988	Guanine nucleotide exchange factor UNC-73A;unc-73;ortholog	TRIO, ISOFORM A (PTHR22826:SF106)	signaling molecule(PC00207)	Caenorhabditis elegans
CAEEL|WormBase=WBGene00003830|UniProtKB=Q9XTY6	180367	Numb-related protein 1;num-1;ortholog	NUMB HOMOLOG (DROSOPHILA)-RELATED (PTHR11232:SF45)	signaling molecule(PC00207)	Caenorhabditis elegans
CAEEL|EnsemblGenome=WBGene00000478|UniProtKB=G5ECQ2	178768	Frizzled-2;cfz-2;ortholog	FRIZZLED-2 (PTHR11309:SF126)	G-protein coupled receptor(PC00021);protease inhibitor(PC00191);signaling molecule(PC00207)	Caenorhabditis elegans
CAEEL|WormBase=WBGene00004958|UniProtKB=Q01608	172498	Presenilin spe-4;spe-4;ortholog	PRESENILIN SPE-4 (PTHR10202:SF25)	aspartic protease(PC00053);membrane-bound signaling molecule(PC00152)	Caenorhabditis elegans
CAEEL|WormBase=WBGene00001717|UniProtKB=Q23353	191191	GRound-Like (Grd related);grl-8;ortholog	GROUND-LIKE (GRD RELATED) (PTHR23261:SF25)	signaling molecule(PC00207)	Caenorhabditis elegans
CAEEL|WormBase=WBGene00002265|UniProtKB=Q20684	174560	GaLECtin;lec-2;ortholog	GALECTIN (PTHR11346:SF93)	cell adhesion molecule(PC00069);signaling molecule(PC00207)	Caenorhabditis elegans
CAEEL|WormBase=WBGene00003006|UniProtKB=G5EDV1	171832	Transmembrane receptor LIN-17;lin-17;ortholog	FRIZZLED-4 (PTHR11309:SF23)	G-protein coupled receptor(PC00021);protease inhibitor(PC00191);signaling molecule(PC00207)	Caenorhabditis elegans
CAEEL|WormBase=WBGene00004036|UniProtKB=G5EFI8	181274	1-phosphatidylinositol 4,5-bisphosphate phosphodiesterase epsilon-1;plc-1;ortholog	1-PHOSPHATIDYLINOSITOL 4,5-BISPHOSPHATE PHOSPHODIESTERASE EPSILON-1 (PTHR10336:SF6)	calcium-binding protein(PC00060);guanyl-nucleotide exchange factor(PC00113);phospholipase(PC00186);signaling molecule(PC00207)	Caenorhabditis elegans
CAEEL|WormBase=WBGene00006462|UniProtKB=G5EC57	181627	Uncharacterized protein;svh-5;ortholog	SUBFAMILY NOT NAMED (PTHR11849:SF190)	nucleic acid binding(PC00171);signaling molecule(PC00207);winged helix/forkhead transcription factor(PC00246)	Caenorhabditis elegans
CAEEL|WormBase=WBGene00004769|UniProtKB=P52166	180441	Presenilin sel-12;sel-12;ortholog	PRESENILIN HOMOLOG (PTHR10202:SF13)	aspartic protease(PC00053);membrane-bound signaling molecule(PC00152)	Caenorhabditis elegans
CAEEL|WormBase=WBGene00006852|UniProtKB=G5EBY8	177719	UNC-129;unc-129;ortholog	UNC-129 (PTHR11848:SF4)	growth factor(PC00112)	Caenorhabditis elegans
CAEEL|WormBase=WBGene00009833|UniProtKB=Q20549	185950	Uncharacterized protein;CELE_F47G9.6;ortholog	GALECTIN (PTHR11346:SF116)	cell adhesion molecule(PC00069);signaling molecule(PC00207)	Caenorhabditis elegans
CAEEL|WormBase=WBGene00017080|UniProtKB=Q5ZR27	178548	Galectin;lec-12;ortholog	GALECTIN (PTHR11346:SF116)	cell adhesion molecule(PC00069);signaling molecule(PC00207)	Caenorhabditis elegans
CAEEL|WormBase=WBGene00002264|UniProtKB=P36573	174964	32 kDa beta-galactoside-binding lectin;lec-1;ortholog	32 KDA BETA-GALACTOSIDE-BINDING LECTIN (PTHR11346:SF108)	cell adhesion molecule(PC00069);signaling molecule(PC00207)	Caenorhabditis elegans
CAEEL|WormBase=WBGene00006570|UniProtKB=O16273	178864	TransformIng Growth factor beta family;tig-2;ortholog	TRANSFORMING GROWTH FACTOR BETA FAMILY (PTHR11848:SF256)	growth factor(PC00112)	Caenorhabditis elegans
CAEEL|WormBase=WBGene00000894|UniProtKB=A5JYR4	174323	DAB (Drosophila disabled) homolog;dab-1;ortholog	PROTEIN DISABLED (PTHR11232:SF47)	signaling molecule(PC00207)	Caenorhabditis elegans
CAEEL|WormBase=C33H5.11d|UniProtKB=A0A0K3AUD2	177565	IntraMembrane Protease (IMPAS) family;imp-3;ortholog	INTRAMEMBRANE PROTEASE (IMPAS) FAMILY (PTHR12174:SF35)	aspartic protease(PC00053);membrane-bound signaling molecule(PC00152)	Caenorhabditis elegans
CAEEL|WormBase=WBGene00019407|UniProtKB=Q21241	173978	LECT-2;lect-2;ortholog	LEUKOCYTE CELL-DERIVED CHEMOTAXIN-2 (PTHR11329:SF0)	chemokine(PC00074)	Caenorhabditis elegans
CAEEL|WormBase=WBGene00003238|UniProtKB=Q9N532	171677	Uncharacterized protein;mig-1;ortholog	SUBFAMILY NOT NAMED (PTHR11309:SF132)	G-protein coupled receptor(PC00021);protease inhibitor(PC00191);signaling molecule(PC00207)	Caenorhabditis elegans
CAEEL|WormBase=WBGene00004128|UniProtKB=C7IVR4	175335	Polyglutamine-repeat protein pqn-41;pqn-41;ortholog	POLYGLUTAMINE-REPEAT PROTEIN PQN-41 (PTHR23261:SF64)	signaling molecule(PC00207)	Caenorhabditis elegans
CAEEL|WormBase=WBGene00006890|UniProtKB=Q7YZW5	181066	Protein vem-1;vem-1;ortholog	CALCUTTA CUP-RELATED (PTHR10281:SF71)	receptor(PC00197);signaling molecule(PC00207)	Caenorhabditis elegans
CAEEL|WormBase=WBGene00002266|UniProtKB=Q09581	174557	32 kDa beta-galactoside-binding lectin lec-3;lec-3;ortholog	32 KDA BETA-GALACTOSIDE-BINDING LECTIN LEC-3 (PTHR11346:SF149)	cell adhesion molecule(PC00069);signaling molecule(PC00207)	Caenorhabditis elegans
CAEEL|WormBase=WBGene00011392|UniProtKB=Q9XTY3	180366	Seven B Two (Mammalian 7BT prohormone convertase chaperone) homolog;sbt-1;ortholog	NEUROENDOCRINE PROTEIN 7B2 (PTHR12738:SF0)	neuropeptide(PC00162);protease inhibitor(PC00191)	Caenorhabditis elegans
CAEEL|WormBase=WBGene00004889|UniProtKB=Q17330	173351	Semaphorin-1A;smp-1;ortholog	SEMAPHORIN-1A (PTHR11036:SF127)	membrane-bound signaling molecule(PC00152)	Caenorhabditis elegans
CAEEL|WormBase=WBGene00003111|UniProtKB=Q95XP4	171727	Semaphorin-2A;mab-20;ortholog	SEMAPHORIN-2A (PTHR11036:SF139)	membrane-bound signaling molecule(PC00152)	Caenorhabditis elegans
CAEEL|WormBase=WBGene00016977|UniProtKB=Q09285	175898	KH domain-containing protein akap-1;akap-1;ortholog	A-KINASE ANCHOR PROTEIN 1, MITOCHONDRIAL (PTHR22948:SF48)	nuclease(PC00170);signaling molecule(PC00207)	Caenorhabditis elegans

## Sheet: Transfer or carrier protein
CAEEL|WormBase=WBGene00017069|UniProtKB=Q19012	183965	Translocase, Inner Mitochondrial Membrane;timm-17b.2;ortholog	AT05822P-RELATED (PTHR10485:SF0)	mitochondrial carrier protein(PC00158);transfer/carrier protein(PC00219)	Caenorhabditis elegans
CAEEL|WormBase=WBGene00015437|UniProtKB=G5EG07	182212	Phospholipid scramblase;scrm-3;ortholog	PHOSPHOLIPID SCRAMBLASE (PTHR23248:SF9)	transfer/carrier protein(PC00219)	Caenorhabditis elegans
CAEEL|WormBase=WBGene00004341|UniProtKB=Q19360	175982	NEDD8-activating enzyme E1 catalytic subunit;rfl-1;ortholog	NEDD8-ACTIVATING ENZYME E1 CATALYTIC SUBUNIT (PTHR10953:SF6)	ligase(PC00142);transfer/carrier protein(PC00219)	Caenorhabditis elegans
CAEEL|WormBase=WBGene00002192|UniProtKB=H9G328	178068	Protein KINase;kin-4;ortholog	DROP OUT, ISOFORM A (PTHR24356:SF356)	annexin(PC00050);calmodulin(PC00061);non-receptor serine/threonine protein kinase(PC00167);transfer/carrier protein(PC00219)	Caenorhabditis elegans
CAEEL|WormBase=WBGene00015487|UniProtKB=Q11189	175912	28S ribosomal protein S17, mitochondrial;mrps-17;ortholog	28S RIBOSOMAL PROTEIN S17, MITOCHONDRIAL (PTHR24088:SF0)	mitochondrial carrier protein(PC00158);transfer/carrier protein(PC00219)	Caenorhabditis elegans
CAEEL|WormBase=WBGene00004727|UniProtKB=Q2L6W9	180655	Serine/threonine-protein kinase sax-1;sax-1;ortholog	SERINE/THREONINE-PROTEIN KINASE TRICORNER (PTHR24356:SF184)	annexin(PC00050);calmodulin(PC00061);non-receptor serine/threonine protein kinase(PC00167);transfer/carrier protein(PC00219)	Caenorhabditis elegans
CAEEL|WormBase=WBGene00000103|UniProtKB=Q9XTG7	181524	Serine/threonine-protein kinase akt-2;akt-2;ortholog	RAC SERINE/THREONINE-PROTEIN KINASE (PTHR24356:SF333)	annexin(PC00050);calmodulin(PC00061);non-receptor serine/threonine protein kinase(PC00167);transfer/carrier protein(PC00219)	Caenorhabditis elegans
CAEEL|WormBase=WBGene00020184|UniProtKB=P91430	171968	Ubiquitin-like modifier-activating enzyme 5;uba-5;ortholog	UBIQUITIN-LIKE MODIFIER-ACTIVATING ENZYME 5 (PTHR10953:SF9)	ligase(PC00142);transfer/carrier protein(PC00219)	Caenorhabditis elegans
CAEEL|WormBase=WBGene00017119|UniProtKB=O44477	177242	Probable mitochondrial import inner membrane translocase subunit tim-17B.1;timm-17B.1;ortholog	MITOCHONDRIAL IMPORT INNER MEMBRANE TRANSLOCASE SUBUNIT TIM-17B.1-RELATED (PTHR10485:SF12)	mitochondrial carrier protein(PC00158);transfer/carrier protein(PC00219)	Caenorhabditis elegans
CAEEL|WormBase=WBGene00009793|UniProtKB=G5EGE3	181244	Protein Kinase N (PKN) homolog;pkn-1;ortholog	SERINE/THREONINE-PROTEIN KINASE N (PTHR24356:SF210)	annexin(PC00050);calmodulin(PC00061);non-receptor serine/threonine protein kinase(PC00167);transfer/carrier protein(PC00219)	Caenorhabditis elegans
CAEEL|WormBase=WBGene00002074|UniProtKB=Q19969	177533	Importin subunit alpha-3;ima-3;ortholog	IMPORTIN SUBUNIT ALPHA (PTHR23316:SF28)	transfer/carrier protein(PC00219)	Caenorhabditis elegans
CAEEL|WormBase=WBGene00010813|UniProtKB=G5EED9	175459	PhosphatidylInositol Transfer Protein family;pitp-1;ortholog	PROTEIN RETINAL DEGENERATION B (PTHR10658:SF11)	transfer/carrier protein(PC00219);transporter(PC00227)	Caenorhabditis elegans
CAEEL|WormBase=WBGene00006699|UniProtKB=Q27481	177855	UBA (Human ubiquitin) related;uba-1;ortholog	GH24511P (PTHR10953:SF4)	ligase(PC00142);transfer/carrier protein(PC00219)	Caenorhabditis elegans
CAEEL|WormBase=WBGene00008924|UniProtKB=Q19529	181399	Probable calcium-binding mitochondrial carrier F17E5.2;F17E5.2;ortholog	FI05451P (PTHR24089:SF57)	amino acid transporter(PC00046);calmodulin(PC00061);mitochondrial carrier protein(PC00158);transfer/carrier protein(PC00219)	Caenorhabditis elegans
CAEEL|WormBase=WBGene00006599|UniProtKB=P34722	176825	Protein kinase C-like 1;tpa-1;ortholog	PROTEIN KINASE C DELTA TYPE HOMOLOG-RELATED (PTHR24356:SF347)	annexin(PC00050);calmodulin(PC00061);non-receptor serine/threonine protein kinase(PC00167);transfer/carrier protein(PC00219)	Caenorhabditis elegans
CAEEL|Gene_ORFName=CELE_R06A4.4|UniProtKB=A0A131MBF9	175094	IMportin Beta family;imb-2;ortholog	FI21453P1 (PTHR10527:SF3)	transfer/carrier protein(PC00219);transporter(PC00227)	Caenorhabditis elegans
CAEEL|WormBase=WBGene00004032|UniProtKB=P34885	179649	Protein kinase C-like 1B;pkc-1;ortholog	PROTEIN KINASE C (PTHR24356:SF240)	annexin(PC00050);calmodulin(PC00061);non-receptor serine/threonine protein kinase(PC00167);transfer/carrier protein(PC00219)	Caenorhabditis elegans
CAEEL|WormBase=WBGene00011976|UniProtKB=Q22718	174442	Uncharacterized protein;CELE_T24B8.2;ortholog	SUBFAMILY NOT NAMED (PTHR22761:SF46)	transfer/carrier protein(PC00219)	Caenorhabditis elegans
CAEEL|WormBase=WBGene00004743|UniProtKB=G5EED5	171756	Secretory carrier-associated membrane protein;scm-1;ortholog	SECRETORY CARRIER-ASSOCIATED MEMBRANE PROTEIN (PTHR10687:SF2)	transfer/carrier protein(PC00219);transferase(PC00220)	Caenorhabditis elegans
CAEEL|WormBase=WBGene00004033|UniProtKB=P90980	181166	Protein kinase C-like 2;pkc-2;ortholog	PROTEIN KINASE C, BRAIN ISOZYME-RELATED (PTHR24356:SF331)	annexin(PC00050);calmodulin(PC00061);non-receptor serine/threonine protein kinase(PC00167);transfer/carrier protein(PC00219)	Caenorhabditis elegans
CAEEL|WormBase=WBGene00021854|UniProtKB=Q965T2	190268	Uncharacterized protein;CELE_Y54F10AR.1;ortholog	VIBRATOR, ISOFORM B (PTHR10658:SF58)	transfer/carrier protein(PC00219);transporter(PC00227)	Caenorhabditis elegans
CAEEL|WormBase=WBGene00002072|UniProtKB=Q22560	179555	Importin subunit alpha-1;ima-1;ortholog	IMPORTIN SUBUNIT ALPHA-1 (PTHR23316:SF67)	transfer/carrier protein(PC00219)	Caenorhabditis elegans
CAEEL|WormBase=WBGene00018290|UniProtKB=O16458	179242	Related to yeast Vacuolar Protein Sorting factor;vps-60;ortholog	CHARGED MULTIVESICULAR BODY PROTEIN 5 (PTHR22761:SF12)	transfer/carrier protein(PC00219)	Caenorhabditis elegans
CAEEL|WormBase=WBGene00018703|UniProtKB=Q20678	180598	Exocyst complex component 1;sec-3;ortholog	EXOCYST COMPLEX COMPONENT 1-RELATED (PTHR16092:SF14)	transfer/carrier protein(PC00219)	Caenorhabditis elegans
CAEEL|WormBase=WBGene00018757|UniProtKB=Q9UAU3	178639	Uncharacterized protein;tag-304;ortholog	GLUCOSE-INDUCED DEGRADATION PROTEIN 8 HOMOLOG (PTHR12864:SF3)	transfer/carrier protein(PC00219);transporter(PC00227)	Caenorhabditis elegans
CAEEL|WormBase=WBGene00014177|UniProtKB=O18282	176719	Protein FRG1 homolog;frg-1;ortholog	FSHD REGION GENE 1 (PTHR12928:SF0)	ribonucleoprotein(PC00201);transfer/carrier protein(PC00219)	Caenorhabditis elegans
CAEEL|WormBase=WBGene00002077|UniProtKB=Q9N5V3	3565440	IMportin Beta family;imb-3;ortholog	KARYOPHERIN (IMPORTIN) BETA 3 (PTHR10527:SF5)	G-protein modulator(PC00022);transfer/carrier protein(PC00219);transporter(PC00227)	Caenorhabditis elegans
CAEEL|WormBase=WBGene00003965|UniProtKB=Q9Y1J3	180475	3-phosphoinositide-dependent protein kinase 1;pdk-1;ortholog	3-PHOSPHOINOSITIDE-DEPENDENT PROTEIN KINASE 1 (PTHR24356:SF309)	annexin(PC00050);calmodulin(PC00061);non-receptor serine/threonine protein kinase(PC00167);transfer/carrier protein(PC00219)	Caenorhabditis elegans
CAEEL|WormBase=WBGene00009829|UniProtKB=Q20546	179567	Uncharacterized protein;CELE_F47G9.1;ortholog	TMED10 PROTEIN (PTHR22811:SF58)	transfer/carrier protein(PC00219);vesicle coat protein(PC00235)	Caenorhabditis elegans
CAEEL|WormBase=WBGene00007743|UniProtKB=Q7YX71	259317	Uncharacterized protein;C26C6.9;ortholog	SUBFAMILY NOT NAMED (PTHR22811:SF77)	transfer/carrier protein(PC00219);vesicle coat protein(PC00235)	Caenorhabditis elegans
CAEEL|WormBase=WBGene00022027|UniProtKB=Q9BL60	171654	Related to yeast Vacuolar Protein Sorting factor;vps-20;ortholog	CHARGED MULTIVESICULAR BODY PROTEIN 6 (PTHR22761:SF5)	transfer/carrier protein(PC00219)	Caenorhabditis elegans

## Sheet: Cell-adhesion molecule
CAEEL|WormBase=WBGene00023502|UniProtKB=Q5WRN9	3564777	C-type LECtin;clec-184;ortholog	C-TYPE LECTIN (PTHR22802:SF221)	cell adhesion molecule(PC00069);immunoglobulin receptor superfamily(PC00124)	Caenorhabditis elegans
CAEEL|WormBase=WBGene00002267|UniProtKB=Q18625	175488	Galectin;lec-4;ortholog	GALECTIN (PTHR11346:SF147)	cell adhesion molecule(PC00069);signaling molecule(PC00207)	Caenorhabditis elegans
CAEEL|WormBase=WBGene00003173|UniProtKB=Q18761	179382	Uncharacterized protein;mec-9;ortholog	SUBFAMILY NOT NAMED (PTHR24039:SF38)	annexin(PC00050);calmodulin(PC00061);cell adhesion molecule(PC00069);extracellular matrix glycoprotein(PC00100);extracellular matrix structural protein(PC00103);receptor(PC00197);signaling molecule(PC00207)	Caenorhabditis elegans
CAEEL|WormBase=WBGene00002265|UniProtKB=Q20684	174560	GaLECtin;lec-2;ortholog	GALECTIN (PTHR11346:SF93)	cell adhesion molecule(PC00069);signaling molecule(PC00207)	Caenorhabditis elegans
CAEEL|WormBase=WBGene00009156|UniProtKB=Q9XVT9	178506	C-type LECtin;clec-196;ortholog	C-TYPE LECTIN (PTHR22802:SF383)	cell adhesion molecule(PC00069);immunoglobulin receptor superfamily(PC00124)	Caenorhabditis elegans
CAEEL|WormBase=WBGene00009833|UniProtKB=Q20549	185950	Uncharacterized protein;CELE_F47G9.6;ortholog	GALECTIN (PTHR11346:SF116)	cell adhesion molecule(PC00069);signaling molecule(PC00207)	Caenorhabditis elegans
CAEEL|WormBase=WBGene00017080|UniProtKB=Q5ZR27	178548	Galectin;lec-12;ortholog	GALECTIN (PTHR11346:SF116)	cell adhesion molecule(PC00069);signaling molecule(PC00207)	Caenorhabditis elegans
CAEEL|WormBase=WBGene00014117|UniProtKB=Q94417	172736	C-type lectin domain-containing protein 91;clec-91;ortholog	C-TYPE LECTIN DOMAIN-CONTAINING PROTEIN 91 (PTHR22802:SF237)	cell adhesion molecule(PC00069);immunoglobulin receptor superfamily(PC00124)	Caenorhabditis elegans
CAEEL|WormBase=WBGene00002264|UniProtKB=P36573	174964	32 kDa beta-galactoside-binding lectin;lec-1;ortholog	32 KDA BETA-GALACTOSIDE-BINDING LECTIN (PTHR11346:SF108)	cell adhesion molecule(PC00069);signaling molecule(PC00207)	Caenorhabditis elegans
CAEEL|EnsemblGenome=WBGene00001475|UniProtKB=G5EDK5	179788	FlaMIngo (Cadherin plus 7TM domain) homolog;fmi-1;ortholog	PROTOCADHERIN-LIKE WING POLARITY PROTEIN STAN (PTHR24026:SF51)	G-protein coupled receptor(PC00021);cadherin(PC00057)	Caenorhabditis elegans
CAEEL|WormBase=WBGene00002266|UniProtKB=Q09581	174557	32 kDa beta-galactoside-binding lectin lec-3;lec-3;ortholog	32 KDA BETA-GALACTOSIDE-BINDING LECTIN LEC-3 (PTHR11346:SF149)	cell adhesion molecule(PC00069);signaling molecule(PC00207)	Caenorhabditis elegans

## Sheet: Extracellular matrix protein
CAEEL|WormBase=WBGene00007261|UniProtKB=Q93177	181643	ELRR (Extracellular Leucine-Rich Repeat) ONly;lron-3;ortholog	ELRR (EXTRACELLULAR LEUCINE-RICH REPEAT) ONLY (PTHR24364:SF23)	extracellular matrix protein(PC00102);receptor(PC00197)	Caenorhabditis elegans
CAEEL|WormBase=WBGene00001082|UniProtKB=P35603	180713	AP-2 complex subunit mu;dpy-23;ortholog	AP-2 COMPLEX SUBUNIT MU (PTHR10529:SF236)	extracellular matrix glycoprotein(PC00100);receptor(PC00197)	Caenorhabditis elegans
CAEEL|WormBase=WBGene00003173|UniProtKB=Q18761	179382	Uncharacterized protein;mec-9;ortholog	SUBFAMILY NOT NAMED (PTHR24039:SF38)	annexin(PC00050);calmodulin(PC00061);cell adhesion molecule(PC00069);extracellular matrix glycoprotein(PC00100);extracellular matrix structural protein(PC00103);receptor(PC00197);signaling molecule(PC00207)	Caenorhabditis elegans
CAEEL|WormBase=WBGene00018304|UniProtKB=G5EG68	3565243	AGRin (Synaptic protein) homolog;agr-1;ortholog	AGRIN (SYNAPTIC PROTEIN) HOMOLOG (PTHR10574:SF385)	extracellular matrix linker protein(PC00101);protease inhibitor(PC00191);receptor(PC00197)	Caenorhabditis elegans
CAEEL|WormBase=WBGene00011723|UniProtKB=L8E6K9	178110	Uncharacterized protein;CELE_T12A7.2;ortholog	SUBFAMILY NOT NAMED (PTHR24035:SF131)	extracellular matrix protein(PC00102)	Caenorhabditis elegans
CAEEL|WormBase=WBGene00006777|UniProtKB=P90761	179387	Putative stoned B-like protein;unc-41;ortholog	STONIN 2 (PTHR10529:SF344)	extracellular matrix glycoprotein(PC00100);receptor(PC00197)	Caenorhabditis elegans
CAEEL|WormBase=WBGene00000164|UniProtKB=Q20736	186194	AdaPtin, Mu/medium chain (Clathrin associated complex);apm-3;ortholog	CARMINE, ISOFORM A (PTHR10529:SF340)	extracellular matrix glycoprotein(PC00100);receptor(PC00197)	Caenorhabditis elegans
CAEEL|WormBase=WBGene00021353|UniProtKB=X5LX93	171771	IG(Immunoglobulin) and LRR(Leucine Rich Repeat) domains;iglr-3;ortholog	IG(IMMUNOGLOBULIN) AND LRR(LEUCINE RICH REPEAT) DOMAINS (PTHR24364:SF24)	extracellular matrix protein(PC00102);receptor(PC00197)	Caenorhabditis elegans
CAEEL|WormBase=WBGene00000415|UniProtKB=Q9XWD6	173064	Cell death abnormality protein 1;ced-1;ortholog	MULTIPLE EPIDERMAL GROWTH FACTOR-LIKE DOMAINS PROTEIN 10 (PTHR24035:SF130)	extracellular matrix protein(PC00102)	Caenorhabditis elegans
CAEEL|WormBase=WBGene00006787|UniProtKB=Q06561	175126	Basement membrane proteoglycan;unc-52;ortholog	BASEMENT MEMBRANE-SPECIFIC HEPARAN SULFATE PROTEOGLYCAN CORE PROTEIN (PTHR10574:SF273)	extracellular matrix linker protein(PC00101);protease inhibitor(PC00191);receptor(PC00197)	Caenorhabditis elegans
CAEEL|WormBase=WBGene00009958|UniProtKB=P90884	172706	Protein madd-4;madd-4;ortholog	PROTEIN MADD-4 (PTHR13723:SF269)	extracellular matrix glycoprotein(PC00100);metalloprotease(PC00153);serine protease inhibitor(PC00204)	Caenorhabditis elegans

[truncated: 15 more sheets: Transmembrane receptor regulato, Cell junction protein, Structural protein, Nucleic acid binding protein, Transcription factor, Hydrolase, Enzyme modulator, Ligase, Oxidoreductase, Chaperone, Lyase, Isomerase, Defense or immunity protein, Storage protein, Viral protein]
