# Supplementary material for: Establishment and maintenance of motor neuron identity via temporal modularity in terminal selector function
Source: eLife. 2020 Oct 1;9:e59464. doi: 10.7554/eLife.59464 (PMC7529460; doi:10.7554/eLife.59464)
Supplement: Supplementary file 3. [file elife-59464-supp3.xlsx]

## Sheet: Sheet1
Transcript enriched in SAB, DA, DB, VA, VB neurons	UNC-3 binding based on ChIP-Seq
act-1	No
act-2	No
anc-1	No
aqp-7	No
cco-1	No
cgp-1	No
col-130	No
crn-2	No
crt-1	No
cup-2	No
cyn-7	No
dad-1	No
daf-21	No
dars-1	No
eat-6	No
eef-1A.2	No
eif-6	No
fis-2	No
flp-5	No
gpc-2	No
gpd-2	No
grp-1	No
gst-7	No
haf-2	No
C50F4.6	No
his-71	No
his-72	No
hmg-1.1	No
hsp-4	No
let-70	No
mbf-1	No
mec-1	No
par-5	No
pdi-3	No
pgp-6	No
rab-1	No
rab-3	No
rab-11.1	No
ran-1	No
rop-1	No
rla-1	No
rpl-10	No
rpl-25.1	No
rpl-27	No
rps-16	No
rps-27	No
rrn-3.1	No
skr-3	No
snb-1	No
sars-1	No
stc-1	No
tba-1	No
tbb-2	No
twk-30	No
nfx-1	No
C01A2.4	No
rilp-1	No
C36E8.1	No
nspc-20	No
nspc-19	No
F08G5.3	No
F14B4.1	No
F14B4.2	No
ubql-1	No
F17C11.11	No
F22B5.4	No
tct-1	No
F39H2.3	No
nspc-9	No
nspc-14	No
nspc-15	No
F58B3.6	No
H36L18.2	No
nduo-6	No
ctc-2	No
R09B3.3	No
T04H1.2	No
T10B9.9	No
sqst-1	No
T20G5.14	No
cutl-15	No
cdka-1	No
T26C5.4	No
Y41C4A.17	No
Y53F4B.14	No
Y87G2A.17	No
fbxa-37	No
ZC410.5	No
C53C7.5	No
F07H5.5	No
MTCE.7	No
snet-1	No
C10G11.7	No
C13A10.2	No
C24A3.2	No
C32E8.3	No
C37C3.2	No
C44E4.4	No
C49G7.10	No
ilys-4	No
D1005.1	No
F38B6.2	No
F41B4.3	No
F41G3.1	No
F53C3.4	No
F53F10.2	No
fgt-1	No
zip-2	No
vms-1	No
K07D4.9	No
K09F6.6	No
K09F6.9	No
K09F6.10	No
calu-1	No
vdac-1	No
R13A5.9	No
T01B6.4	No
pdf-1	No
T22F3.3	No
T28D9.1	No
Y45G5AM.3	No
Y52E8A.3	No
Y54G2A.18	No
Y58A7A.5	No
Y71H2B.4	No
blos-2	No
Y73B6BL.35	No
Y82E9BR.3	No
ZK484.1	No
C30E1.9	No
Y55B1BR.5	No
ZK622.5	No
bnc-1	No
C49G7.12	No
T07C12.15	No
F52G3.6	No
nlp-18	No
R102.2	No
flp-19	No
unc-54	No
ctc-3	No
K03B4.4	No
pat-10	No
F44E5.4	No
F41B4.2	No
R74.10	No
hsp-16.2	No
T02C12.5	No
gst-5	No
K10C9.1	No
K02F2.5	No
E04D5.5	No
nduo-1	No
ins-18	No
W05E10.2	No
eef-1B.1	No
C13G3.1	No
T04C12.3	No
linc-7	No
eat-4	No
R12G8.1	No
nlp-3	No
flp-6	No
rgs-2	No
T05A8.3	No
F58E10.7	No
nlp-8	No
eri-6	No
flp-12	No
nspc-18	No
Y53F4B.45	No
hsp-16.11	No
flp-27	No
ast-1	No
F08G12.8	No
flp-22	No
F17C11.2	No
F58H1.7	No
M02E1.2	No
C33A12.4	No
flp-1	No
ins-30	No
K09E4.4	No
pdi-2	No
rps-26	No
egl-3	No
E02A10.3	No
linc-25	No
Y37E3.8	No
rps-10	No
npr-2	No
F54D7.7	No
nlp-13	No
T20B3.14	No
rps-1	No
flp-32	No
acr-2	No
acr-17	No
erp-1	No
flp-11	No
tag-89	No
rhgf-1	No
twk-35	No
vab-8	No
C06A1.2	No
syg-2	No
F54E4.4	No
T01B7.9	No
lron-14	No
ssu-2	No
ZK757.2	No
C06E7.2	No
C29H12.6	No
C33C12.9	No
dmsr-7	No
F08F3.1	No
F38E9.5	No
F40A3.4	No
F55C12.4	No
frpr-13	No
lgc-33	No
pfk-1.1	No
lfi-1	No
lin-15A	No
gpb-1	No
ubq-2	No
cco-2	No
hil-2	No
rho-1	No
rpl-37	No
cdr-4	No
gdi-1	No
nduo-4	No
cnb-1	No
T10B5.4	No
rpl-24.1	No
nspc-10	No
tag-80	No
unc-70	No
rpl-36	No
rps-6	No
sup-1	No
F23H11.5	No
rps-30	No
ZK792.7	No
drap-1	No
eef-2	No
R53.4	No
nlr-1	No
C11E4.6	No
gnrr-4	No
F29B9.12	No
F54E4.3	No
his-41	No
twk-13	No
jnk-1	No
Y12A6A.2	No
rps-0	No
Y64G10A.6	No
rpl-1	No
D2092.1	No
tes-1	No
F55C12.1	No
tag-68	No
F42C5.9	No
T01G1.2	No
ubl-1	No
cutl-19	No
twk-17	No
gei-3	No
dop-3	No
baf-1	Yes
cab-1	Yes
cap-2	Yes
ccb-1	Yes
ceh-12	Yes
cey-1	Yes
cka-2	Yes
clp-4	Yes
cmd-1	Yes
cyn-3	Yes
dlk-1	Yes
egl-21	Yes
fat-1	Yes
flp-9	Yes
flp-18	Yes
frm-1	Yes
ftt-2	Yes
gem-4	Yes
his-37	Yes
hlh-17	Yes
hsp-1	Yes
hsp-3	Yes
hsp-70	Yes
ida-1	Yes
jip-1	Yes
klc-2	Yes
ldh-1	Yes
lec-3	Yes
lgg-1	Yes
nlp-1	Yes
nlp-9	Yes
nlp-15	Yes
nlp-21	Yes
pan-1	Yes
pbs-2	Yes
pfn-1	Yes
pqn-44	Yes
ric-4	Yes
rla-0	Yes
rpl-7A	Yes
rpl-19	Yes
snt-1	Yes
snt-4	Yes
sod-4	Yes
spc-1	Yes
tba-2	Yes
tli-1	Yes
tpi-1	Yes
tsp-7	Yes
twk-29	Yes
uba-1	Yes
ubq-1	Yes
unc-1	Yes
unc-44	Yes
unc-52	Yes
unc-62	Yes
unc-108	Yes
unc-116	Yes
xbp-1	Yes
zyx-1	Yes
cpna-5	Yes
B0457.6	Yes
nlp-38	Yes
C04F12.5	Yes
rmd-2	Yes
C34F6.10	Yes
nspc-17	Yes
F09C3.2	Yes
F20D1.3	Yes
lgc-31	Yes
ndk-1	Yes
F26H9.5	Yes
xbx-6	Yes
F44E5.5	Yes
twk-48	Yes
clip-1	Yes
glb-22	Yes
pde-12	Yes
R107.5	Yes
T01C1.4	Yes
sbt-1	Yes
aldo-1	Yes
enpl-1	Yes
enol-1	Yes
lron-9	Yes
T26C5.5	Yes
T28D6.5	Yes
nra-1	Yes
W05H12.1	Yes
hlh-32	Yes
ZK287.1	Yes
pdi-6	Yes
C01C4.3	Yes
mdt-26	Yes
ari-1	Yes
lntl-1	Yes
C35B1.2	Yes
snap-1	Yes
nap-1	Yes
F07C3.2	Yes
F08D12.12	Yes
F14F9.4	Yes
pgal-1	Yes
pcca-1	Yes
F37C4.5	Yes
vps-60	Yes
mdh-1	Yes
F47D12.3	Yes
pccb-1	Yes
K06H7.7	Yes
tos-1	Yes
K07C11.7	Yes
M04F3.4	Yes
pgk-1	Yes
T19C3.3	Yes
T22E5.1	Yes
T27C4.1	Yes
pck-1	Yes
mvk-1	Yes
Y61A9LA.1	Yes
pghm-1	Yes
cpx-1	Yes
Y119C1B.3	Yes
ZC155.2	Yes
ZK154.6	Yes
F43C1.7	Yes
oig-5	Yes
Y53F4B.51	Yes
K09F6.13	Yes
C01G5.25	Yes
nlp-11	Yes
F26E4.3	Yes
ugt-50	Yes
B0252.8	Yes
egl-30	Yes
flp-14	Yes
eef-1G	Yes
fbxa-24	Yes
aip-1	Yes
T27A10.2	Yes
rpl-12	Yes
cle-1	Yes
unc-4	Yes
lgc-36	Yes
madd-4	Yes
C13A2.12	Yes
Y43F8B.2	Yes
unc-80	Yes
his-24	Yes
exc-7	Yes
twk-43	Yes
W05E10.5	Yes
F43C9.2	Yes
rpl-38	Yes
cho-1	Yes
F52A8.3	Yes
C08G9.1	Yes
Y44A6D.2	Yes
F58F9.1	Yes
ben-1	Yes
cal-2	Yes
gab-1	Yes
gar-2	Yes
ggr-1	Yes
hot-6	Yes
mab-9	Yes
mig-1	Yes
rig-3	Yes
sax-7	Yes
sto-6	Yes
twk-7	Yes
unc-3	Yes
unc-9	Yes
unc-13	Yes
unc-17	Yes
unc-41	Yes
unc-77	Yes
unc-82	Yes
unc-129	Yes
vab-7	Yes
zag-1	Yes
zig-1	Yes
zig-8	Yes
tag-180	Yes
nrx-1	Yes
F11C1.4	Yes
F19C6.2	Yes
hecw-1	Yes
ztf-26	Yes
F57B7.2	Yes
R90.1	Yes
T19C4.5	Yes
T24F1.4	Yes
cpd-2	Yes
acc-4	Yes
lgc-35	Yes
Y53F4B.12	Yes
Y54E2A.10	Yes
cls-3	Yes
ZK1067.4	Yes
C02B10.3	Yes
soap-1	Yes
C24B5.1	Yes
C45G9.8	Yes
agr-1	Yes
H06I04.6	Yes
H11E01.3	Yes
H14E04.2	Yes
M04G7.3	Yes
twk-49	Yes
gcy-28	Yes
tmc-1	Yes
hex-1	Yes
arrd-22	Yes
dmsr-2	Yes
ZC581.3	Yes
gbb-2	Yes
lin-15B	Yes
R05C11.4	Yes
gsa-1	Yes
rps-5	Yes
F39B2.8	Yes
W02C12.2	Yes
rps-25	Yes
hsp-16.41	Yes
rps-14	Yes
R04F11.2	Yes
rpl-6	Yes
hil-3	Yes
T04C9.1	Yes
F29B9.11	Yes
atp-2	Yes
lron-3	Yes
snn-1	Yes
rps-7	Yes
par-1	Yes
clp-1	Yes
unc-115	Yes
unc-69	Yes
kin-2	Yes
goa-1	Yes
rps-9	Yes
F32B5.7	Yes
far-1	Yes
unc-104	Yes
VM106R.1	Yes
unc-76	Yes
F46H5.3	Yes
frm-8	Yes
rpl-13	Yes
mec-12	Yes
aps-2	Yes
ppk-2	Yes
DH11.5	Yes
hmg-11	Yes
rpl-29	Yes
cah-3	Yes
mtch-1	Yes
W05B5.1	Yes
mca-3	Yes
dhs-17	Yes
acr-14	Yes
aqp-2	Yes
lin-39	Yes
smp-1	Yes
twk-40	Yes
unc-8	Yes
ttr-52	Yes
zoo-1	Yes
ZK849.1	Yes
C50D2.6	Yes
pqn-52	Yes
ZK1320.13	Yes
lurp-1	Yes
C44H4.6	Yes
mbk-2	Yes
unc-18	Yes
hsp-25	Yes
F02A9.1	Yes
hot-2	Yes
F47F2.1	Yes
T28F4.5	Yes
gopc-1	Yes
rpl-18	Yes
ant-1.1	Yes
R10E11.5	Yes
mpz-1	Yes
T13H5.1	Yes
unc-58	Yes
ret-1	Yes
Y72A10A.1	Yes
twk-46	Yes
kvs-1	Yes
M03E7.1	Yes
unc-53	Yes
unc-68	Yes
Y54G2A.26	Yes
saeg-1	Yes
apl-1	Yes
F28E10.1	Yes
Y47A7.2	Yes
Y97E10C.1	Yes
F52E1.9	Yes
F13E9.11	Yes
kpc-1	Yes
